# Supplementary material
Source: Royal Society of Chemistry journal article supplement (doi:10.1039/d6qo00409a)
Supplement: d6qo00409a1.pdf [file d6qo00409a1.pdf]

## SUPPORTING INFORMATION

### Ligand-Controlled Chemoselective Nickel-Catalyzed Cross-Electrophile Coupling of Cyclic Anhydrides with Alkyl Bromides

Tingzhi Lin,<sup>a</sup> Junlong Jia,<sup>†,a</sup> Yu Wu,<sup>†,b</sup> Ziheng Li,<sup>†,a</sup> Xueying Gao,<sup>a</sup> Junyu Ma,<sup>a</sup> Mengjiao Wei,<sup>a</sup> Yifei Song,<sup>a</sup> Zifan Wang,<sup>a</sup> Xinrui Yuan,<sup>a</sup> Patrick J. Walsh<sup>\*,b</sup> and Jianyou Mao<sup>\*,a</sup>

<sup>a</sup>Institute of Advanced Synthesis, School of Chemistry and Molecular Engineering, Nanjing Tech University, 30 South Puzhu Road, Nanjing 211816, China.

E-mail: ias\_jymao@njtech.edu.cn

<sup>b</sup>Roy and Diana Vagelos Laboratories, Penn/Merck Laboratory for High-Throughput Experimentation, University of Pennsylvania, Department of Chemistry, 231 South 34th Street, Philadelphia, Pennsylvania 19104, USA.

E-mail: pwalsh@sas.upenn.edu

<sup>†</sup>These authors contributed equally.

#### Table of Contents

|                                                                                                                                     |   |
|-------------------------------------------------------------------------------------------------------------------------------------|---|
| 1. General Information .....                                                                                                        | 3 |
| 2. General Procedure A for the Synthesis of $\gamma$ -Keto Acids .....                                                              | 3 |
| 3. General Procedure B for the Synthesis of $\beta$ -Alkylated Acid Derivatives .....                                               | 3 |
| 4. Systematic Study of Reaction Conditions .....                                                                                    | 4 |
| 4.1 Table S1: Optimization of the nickel sources for the synthesis of $\gamma$ -keto acids .....                                    | 4 |
| 4.2 Table S2: Optimization of the solvent for the synthesis of $\gamma$ -keto acids .....                                           | 4 |
| 4.3 Table S3: Optimization of the ratio of <b>1a</b> to <b>2a</b> for the synthesis of $\gamma$ -keto acids .....                   | 5 |
| 4.4 Table S4: Optimization of the ratio of Zn powder for the synthesis of $\gamma$ -keto acids .....                                | 5 |
| 4.5 Table S5: Optimization of the reaction concentration for the synthesis of $\gamma$ -keto acids.....                             | 6 |
| 4.6 Table S6: Optimization of different electrophilic reagents .....                                                                | 6 |
| 4.7 Table S7: Optimization of the ligand for the synthesis of $\gamma$ -keto acids .....                                            | 6 |
| 4.8 Table S8: Optimization of the reaction temperature for the synthesis of $\gamma$ -keto acids .....                              | 7 |
| 4.9 Table S9: Optimization of the reaction time for the synthesis of $\gamma$ -keto acids .....                                     | 8 |
| 4.10 Table S10: Optimization of the nickel sources for the synthesis of $\beta$ -alkylated acid derivatives .....                   | 8 |
| 4.11 Table S11: Optimization of the ratio of <b>1a</b> and <b>2l</b> for the synthesis of $\beta$ -alkylated acid derivatives ..... | 9 |
| 4.12 Table S12: Optimization of the temperature for the synthesis of $\beta$ -alkylated acid                                        |   |

|                                                                                                                                                                                                                                                                                                   |    |
|---------------------------------------------------------------------------------------------------------------------------------------------------------------------------------------------------------------------------------------------------------------------------------------------------|----|
| derivatives .....                                                                                                                                                                                                                                                                                 | 9  |
| 4.13 Table S13: Optimization of the catalyst mol% for the synthesis of $\beta$ -alkylated acid derivatives .....                                                                                                                                                                                  | 9  |
| 5. Scale-up Transformation on 10.0 mmol Scale for the Synthesis of $\gamma$ -Keto Acid <b>3ar</b> .....                                                                                                                                                                                           | 10 |
| 6. Scale-up Transformation on 10.0 mmol Scale for the Synthesis of $\beta$ -Alkylated Acid <b>4ae</b> .....                                                                                                                                                                                       | 10 |
| 7. Mechanistic Studies .....                                                                                                                                                                                                                                                                      | 11 |
| 7.1 Figure S1. HRMS for <b>3aa'</b> .....                                                                                                                                                                                                                                                         | 11 |
| 7.2 Figure S2. HRMS for <b>4al'</b> .....                                                                                                                                                                                                                                                         | 12 |
| 7.3 Figure S3. $^1\text{H}$ NMR (400 MHz, $\text{CDCl}_3$ ) for <b>3azb+3azb'</b> .....                                                                                                                                                                                                           | 13 |
| 7.4 Figure S4. $^1\text{H}$ NMR (400 MHz, $\text{CDCl}_3$ ) for <b>3azc+3azc'</b> .....                                                                                                                                                                                                           | 13 |
| 7.5 Figure S5. (A) Preparation of the Ni homoenolate <b>1B</b> ; (B) Preparation of the alkyl nickel species <b>1C</b> ; (C) Infrared spectroscopy of anhydride <b>1a</b> , <b>1B</b> and <b>1C</b> (The infrared spectra were obtained with KBr plates by using a IS10 FT-IR Spectrometer) ..... | 14 |
| 7.6 Figure S6. HRMS for <b>1B</b> .....                                                                                                                                                                                                                                                           | 15 |
| 7.7 Figure S7. HRMS for <b>1C</b> .....                                                                                                                                                                                                                                                           | 15 |
| 7.8 Table S13: Selectivity in oxidative addition to $(\text{L})\text{Ni}^0$ . Percent of remaining <b>1a</b> and <b>2l</b> with yield of <b>3al</b> .....                                                                                                                                         | 15 |
| 7.9 Table S14: Selectivity in oxidative addition to $(\text{L})\text{Ni}^0$ . Percent of remaining <b>1a</b> and <b>2l</b> with yield of <b>4al</b> .....                                                                                                                                         | 16 |
| 7.10 Table S15: Selectivity in oxidative addition to $(\text{L})\text{Ni}^0$ . Percent of remaining <b>1a</b> and <b>2l</b> with yield of <b>4al</b> .....                                                                                                                                        | 16 |
| 7.11 Procedures for the synthesis of $[(\text{dtbbpy})\text{Ni}^{\text{I}}\text{Cl}]_2$ .....                                                                                                                                                                                                     | 17 |
| 7.12 Procedures for the reactivity test of cyclic anhydrides and alkyl bromides using the $[(\text{dtbbpy})\text{Ni}^{\text{I}}\text{Cl}]_2$ complex. ....                                                                                                                                        | 17 |
| 7.13 Table S16: Selectivity in oxidative addition to $(\text{L})\text{Ni}^{\text{I}}$ at room temperature. Percent of remaining <b>1a</b> and <b>2l</b> with yield of <b>4al</b> .....                                                                                                            | 18 |
| 7.14 Table S17: Selectivity in oxidative addition to $(\text{L})\text{Ni}^{\text{I}}$ at 40 °C heating. Percent of remaining <b>1a</b> and <b>2l</b> with yield of <b>4al</b> .....                                                                                                               | 18 |
| 8. Characterization Data for All Products .....                                                                                                                                                                                                                                                   | 20 |
| 9. References .....                                                                                                                                                                                                                                                                               | 34 |
| 10. NMR Spectra .....                                                                                                                                                                                                                                                                             | 35 |

## 1. General Information

All reactions were carried out under an atmosphere of dry nitrogen. Anhydrous DMA was purchased from J&K and used without further purification. Unless otherwise stated, reagents were commercially available and used as purchased. Chemicals were obtained from Sigma-Aldrich, Acros, Innochem, Energy Chemical, TCI China or Alfa Aesar. The progress of the reactions was monitored by thin-layer chromatography using TLC plates and visualized by bromocresol green solution. Flash chromatography was performed with Qingdao Haiyang flash silica gel (200–300 mesh). The NMR spectra were obtained using a Bruker 400 MHz Fourier-transform NMR spectrometer. Chemical shifts were reported in units of parts per million (ppm) downfield from tetramethylsilane (TMS), and all coupling constants were reported in hertz. The infrared spectra were obtained with KBr plates by using a IS10 FT-IR Spectrometer (ThermoFisher Corporation). High resolution mass spectrometry (HRMS) data were obtained on a Waters LC-TOF mass spectrometer (Xevo G2-XS QToF) using electrospray ionization (ESI) in positive or negative mode. Melting points were measured using a WRS-1C Melt-Temp apparatus and were uncorrected.

## 2. General Procedure A for the Synthesis of $\gamma$ -Keto Acids

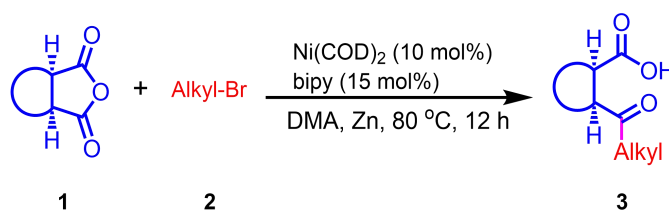

**General Procedure A:** To an oven-dried microwave vial (10 mL) equipped with a stir bar (10 × 5 mm) was added  $\text{Ni}(\text{COD})_2$  (8.3 mg, 0.03 mmol), bipy (7.0 mg, 0.045 mmol) under nitrogen atmosphere inside a glove box at 25 °C. Next, 0.22 mL of dry DMA was added via syringe to give a purple solution. After the catalyst/ligand solution was stirred for 1 h at 25 °C inside the glove box, Zn powder (39.2 mg, 0.6 mmol, 2.0 equiv) was added to the reaction vial followed by the bicyclic anhydride (0.45 mmol, 1.5 equiv) and alkyl bromide (0.3 mmol, 1.0 equiv). The microwave vial was sealed with a cap containing a rubber septum and removed from the glove box. The reaction mixture was stirred (1000 rpm) at 80 °C for 12 h. The resulting dark brown solution was then quenched by addition of 5 drops water via syringe and then the vial opened to air. The reaction mixture was passed through a short pad of silica gel and rinsed with 5 mL of ethyl acetate to afford a dark brown solution. The solvent was removed by rotary evaporator. The crude residue was purified by flash column chromatography to yield the corresponding product.

## 3. General Procedure B for the Synthesis of $\beta$ -Alkylated Acid Derivatives

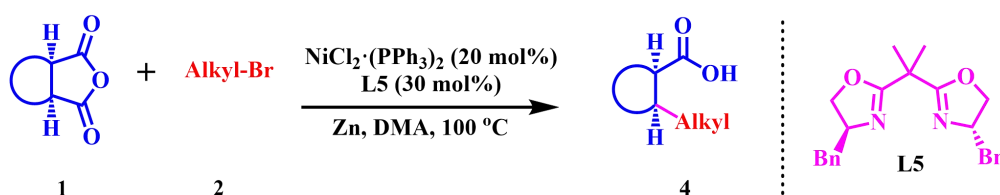

**General Procedure B:** To an oven-dried microwave vial (10 mL) equipped with a stir bar (10 × 5 mm)

was added NiCl<sub>2</sub>·(PPh<sub>3</sub>)<sub>2</sub> (39.3 mg, 0.06 mmol), L5 (32.6 mg, 0.09 mmol) under a nitrogen atmosphere inside a glove box at 25 °C. Next, 0.6 mL of dry DMA was added via syringe to give a purple solution. After the catalyst/ligand solution was stirred for 1 h at 25 °C inside the glove box, Zn powder (39.2 mg, 0.6 mmol, 2.0 equiv) was added to the reaction vial followed by the bicyclic anhydride (0.3 mmol, 1 equiv) and alkyl bromide (0.6 mmol, 2.0 equiv). The microwave vial was sealed with a cap containing a rubber septum and removed from the glove box. The reaction mixture was stirred (1000 rpm) at 100 °C for 24 h. The resulting dark brown solution was then quenched by addition of 5 drops water via syringe and then the vial opened to air. The reaction mixture was passed through a short pad of silica gel and rinsed with 5 mL of ethyl acetate to afford a dark brown solution. The solvent was removed by rotary evaporator. The crude residue was purified by flash column chromatography to yield the corresponding product.

#### 4. Systematic Study of Reaction Conditions

##### 4.1 Table S1: Optimization of the nickel sources for the synthesis of $\gamma$ -keto acids

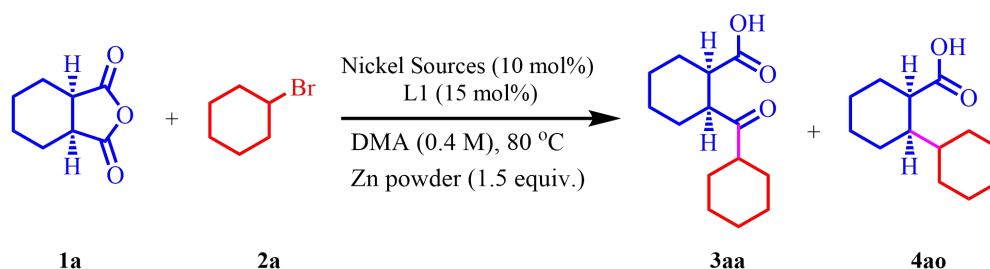

| Entry | Ni Sources                                            | Yield (%) <sup>a</sup> ( <b>3aa</b> : <b>4ao</b> ) |
|-------|-------------------------------------------------------|----------------------------------------------------|
| 1     | Ni(COD) <sub>2</sub>                                  | 22:0                                               |
| 2     | NiBr <sub>2</sub>                                     | 7:0                                                |
| 3     | NiI <sub>2</sub>                                      | 16:0                                               |
| 4     | NiBr <sub>2</sub> ·DME                                | 18:0                                               |
| 5     | Ni(acac) <sub>2</sub>                                 | 8:0                                                |
| 6     | NiBr <sub>2</sub> ·glyme                              | 17:0                                               |
| 7     | Ni(ClO <sub>4</sub> ) <sub>2</sub> ·6H <sub>2</sub> O | 0:0                                                |
| 8     | NiF <sub>2</sub>                                      | 0:0                                                |
| 9     | NiCl <sub>2</sub>                                     | 0:0                                                |
| 10    | NiCl <sub>2</sub> ·(PPh <sub>3</sub> ) <sub>2</sub>   | 19:0                                               |

<sup>a</sup>Isolated yields.

##### 4.2 Table S2: Optimization of the solvent for the synthesis of $\gamma$ -keto acids

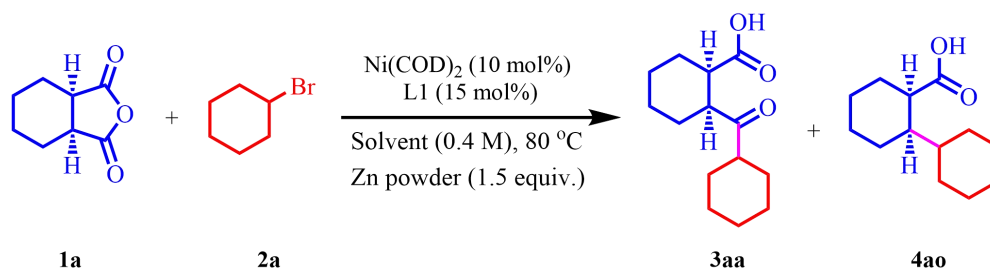

| Entry | Solvents | Yield (%) <sup>a</sup> ( <b>3aa</b> : <b>4ao</b> ) |
|-------|----------|----------------------------------------------------|
|-------|----------|----------------------------------------------------|

|    |                    |       |
|----|--------------------|-------|
| 1  | DMA                | 22:0  |
| 2  | DMF                | trace |
| 3  | DMSO               | trace |
| 4  | THF                | trace |
| 5  | Dioxane            | trace |
| 6  | CH <sub>3</sub> CN | trace |
| 7  | Toluene            | 0     |
| 8  | 2-MeTHF            | 0     |
| 9  | TBME               | 0     |
| 10 | CPME               | 0     |

<sup>a</sup>Isolated yields. Trace means the yield <5%.

#### 4.3 Table S3: Optimization of the ratio of 1a to 2a for the synthesis of $\gamma$ -keto acids

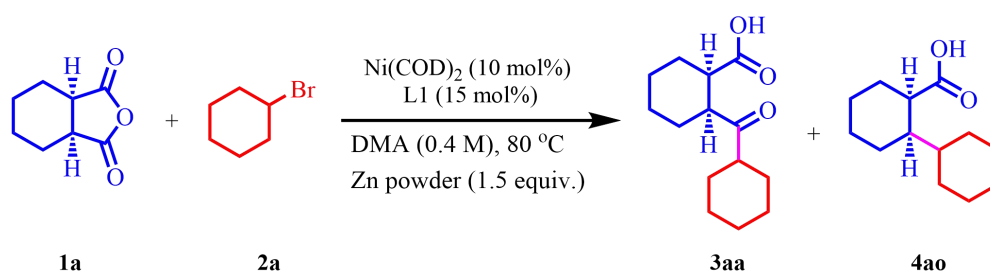

| Entry | 1a:2a | Yield (%) <sup>a</sup> (3aa:4ao) |
|-------|-------|----------------------------------|
| 1     | 3:1   | 27:0                             |
| 2     | 2:1   | 43:0                             |
| 3     | 1.5:1 | 52:0                             |
| 4     | 1:1   | 45:0                             |
| 5     | 1:1.5 | 23:0                             |
| 6     | 1:2   | trace                            |
| 7     | 1:3   | trace                            |

<sup>a</sup>Isolated yields. Trace means the yield <5%.

#### 4.4 Table S4: Optimization of the ratio of Zn powder for the synthesis of $\gamma$ -keto acids

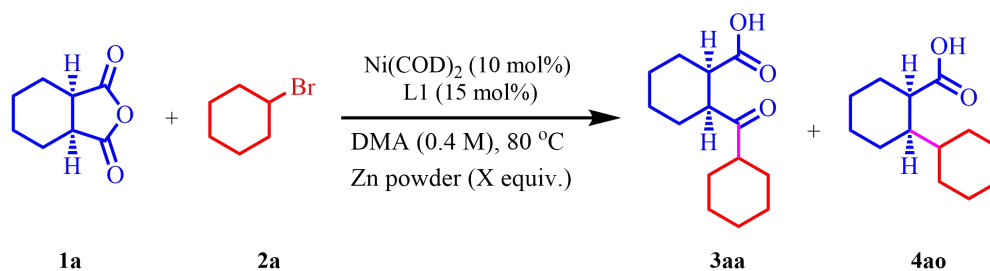

| Entry | Zn powder (X equiv.) | Yield (%) <sup>a</sup> (3aa:4ao) |
|-------|----------------------|----------------------------------|
| 1     | 0.5                  | 11:0                             |
| 2     | 1                    | 18:0                             |
| 3     | 1.5                  | 43:0                             |
| 4     | 2                    | 56:0                             |

|   |     |      |
|---|-----|------|
| 5 | 2.5 | 54:0 |
| 6 | 3   | 48:0 |
| 7 | 3.5 | 45:0 |

<sup>a</sup>Isolated yields.

#### 4.5 Table S5: Optimization of the reaction concentration for the synthesis of $\gamma$ -keto acids

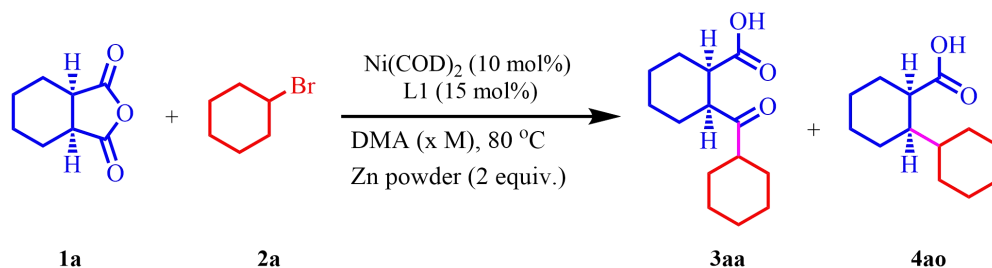

| Entry | DMA (x M) | Yield (%) <sup>a</sup> (3aa:4ao) |
|-------|-----------|----------------------------------|
| 1     | 0.2       | 47:0                             |
| 2     | 0.4       | 56:0                             |
| 3     | 0.5       | 58:0                             |
| 4     | 1.0       | 72:0                             |
| 5     | 1.3       | 78:0                             |
| 6     | 2.0       | 66:0                             |

<sup>a</sup>Isolated yields.

#### 4.6 Table S6: Optimization of different electrophilic reagents

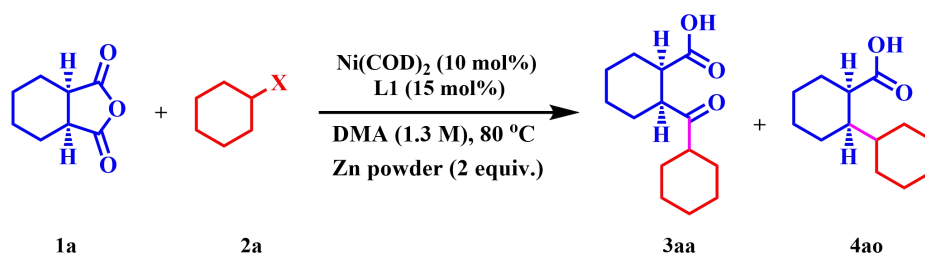

| Entry | X  | Yield <sup>a</sup> (%) (3aa:4ao) |
|-------|----|----------------------------------|
| 1     | Cl | 46:0                             |
| 2     | Br | 78:0                             |
| 3     | I  | 72:0                             |

<sup>a</sup>Isolated yields.

#### 4.7 Table S7: Optimization of the ligand for the synthesis of $\gamma$ -keto acids

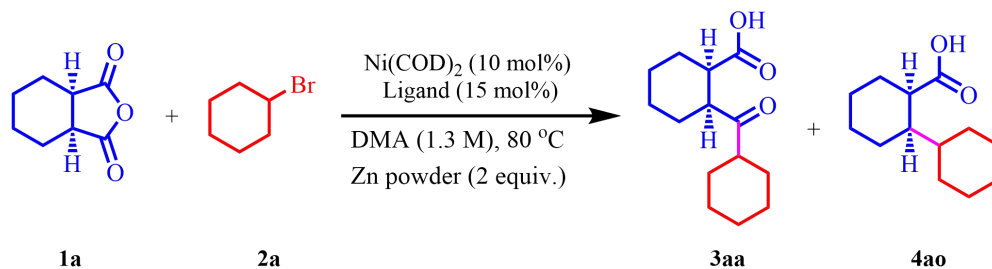

| Entry | Ligand | Yield <sup>a</sup> (%) (3aa:4ao) |
|-------|--------|----------------------------------|
| 1     | L1     | 78:0                             |
| 2     | L2     | trace:0                          |
| 3     | L3     | trace:0                          |
| 4     | L4     | trace:0                          |
| 5     | L5     | trace:12                         |
| 6     | L6     | 13:0                             |
| 7     | L7     | 11:0                             |
| 8     | L8     | 8:0                              |
| 9     | L9     | trace                            |
| 10    | L10    | 0:0                              |
| 11    | L11    | trace                            |
| 12    | L12    | 8:0                              |
| 13    | L13    | trace                            |
| 14    | L14    | 12:0                             |
| 15    | L15    | 15:0                             |
| 16    | L16    | 9:0                              |
| 17    | L17    | 12:0                             |
| 18    | L18    | trace                            |
| 19    | L19    | trace                            |
| 20    | L20    | trace                            |

<sup>a</sup>Isolated yields. Trace means the yield <5%.

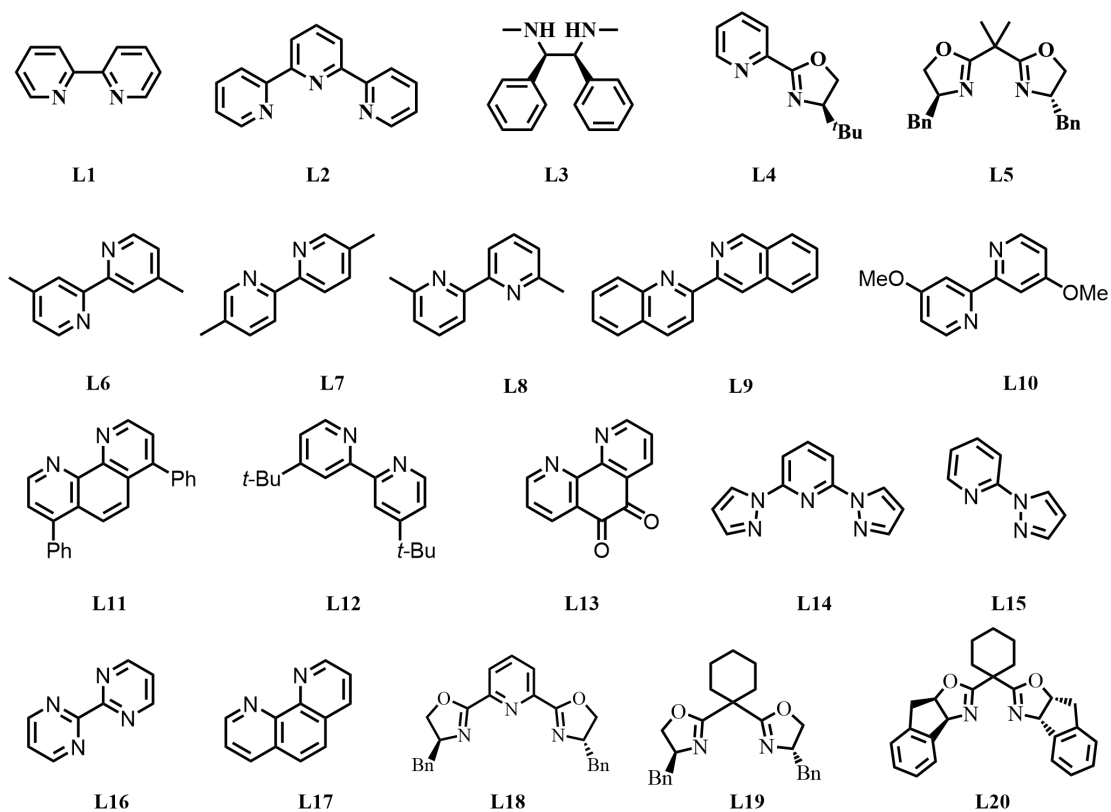

4.8 Table S8: Optimization of the reaction temperature for the synthesis of  $\gamma$ -keto acids

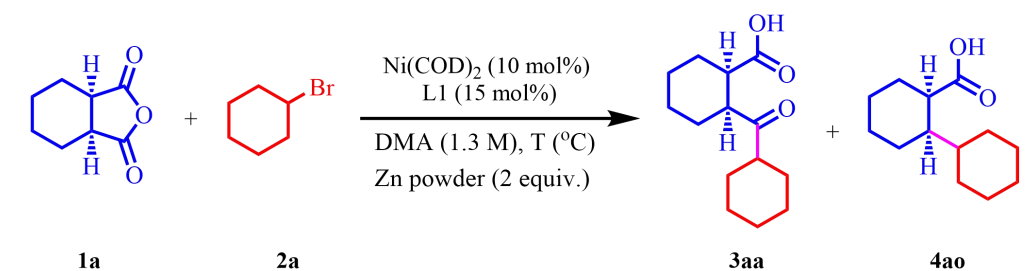

| Entry | T/°C | Yield <sup>a</sup> (%) (3aa:4ao) |
|-------|------|----------------------------------|
| 1     | 25   | trace                            |
| 2     | 40   | 33:0                             |
| 3     | 60   | 57:0                             |
| 4     | 80   | 78:0                             |
| 5     | 100  | 74:0                             |
| 6     | 120  | 66:0                             |

<sup>a</sup>Isolated yields. Trace means the yield <5%.

#### 4.9 Table S9: Optimization of the reaction time for the synthesis of $\gamma$ -keto acids

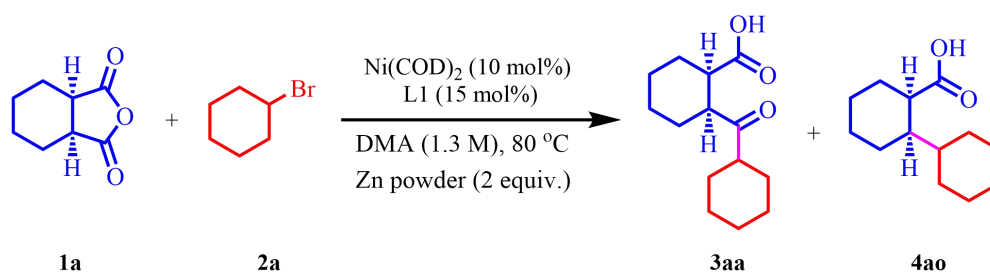

| Entry | t/h | Yield <sup>a</sup> (%) (3aa:4ao) |
|-------|-----|----------------------------------|
| 1     | 3   | 17:0                             |
| 2     | 6   | 36:0                             |
| 3     | 9   | 63:0                             |
| 4     | 12  | 78:0                             |
| 5     | 15  | 77:0                             |
| 6     | 18  | 78:0                             |
| 7     | 21  | 74:0                             |
| 8     | 24  | 72:0                             |

<sup>a</sup>Isolated yields.

#### 4.10 Table S10: Optimization of the nickel sources for the synthesis of $\beta$ -alkylated acid derivatives

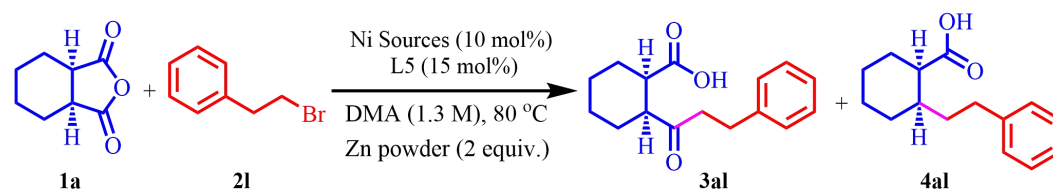

| Entry | Ni Sources           | Yield (%) <sup>a</sup> (3al:4al) |
|-------|----------------------|----------------------------------|
| 1     | Ni(COD) <sub>2</sub> | trace:19                         |

|    |                                                       |          |
|----|-------------------------------------------------------|----------|
| 2  | NiBr <sub>2</sub>                                     | 7:13     |
| 3  | NiI <sub>2</sub>                                      | 6:28     |
| 4  | NiBr <sub>2</sub> ·DME                                | 11:26    |
| 5  | Ni(acac) <sub>2</sub>                                 | trace    |
| 6  | NiBr <sub>2</sub> ·glyme                              | 7:33     |
| 7  | Ni(ClO <sub>4</sub> ) <sub>2</sub> ·6H <sub>2</sub> O | trace    |
| 8  | NiF <sub>2</sub>                                      | trace    |
| 9  | NiCl <sub>2</sub>                                     | trace    |
| 10 | NiCl <sub>2</sub> ·(PPh <sub>3</sub> ) <sub>2</sub>   | trace:45 |

<sup>a</sup>Isolated yields. Trace means the yield <5%.

#### 4.11 Table S11: Optimization of the ratio of 1a and 2l for the synthesis of β-alkylated acid derivatives

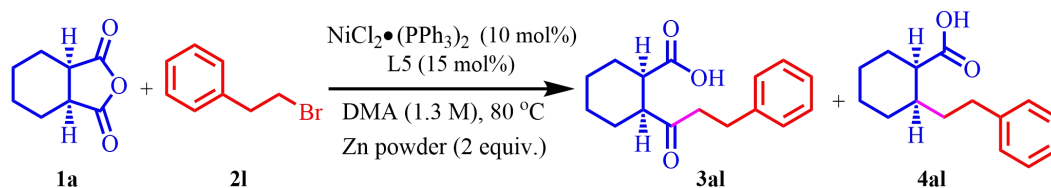

| Entry | 1a:2l | Yield (%) <sup>a</sup> (3al:4al) |
|-------|-------|----------------------------------|
| 1     | 3:1   | trace:37                         |
| 2     | 2:1   | trace:42                         |
| 3     | 1.5:1 | trace:45                         |
| 4     | 1:1   | trace:46                         |
| 5     | 1:1.5 | trace:48                         |
| 6     | 1:2   | trace:57                         |
| 7     | 1:3   | trace:55                         |

<sup>a</sup>Isolated yields. Trace means the yield <5%.

#### 4.12 Table S12: Optimization of the temperature for the synthesis of β-alkylated acid derivatives

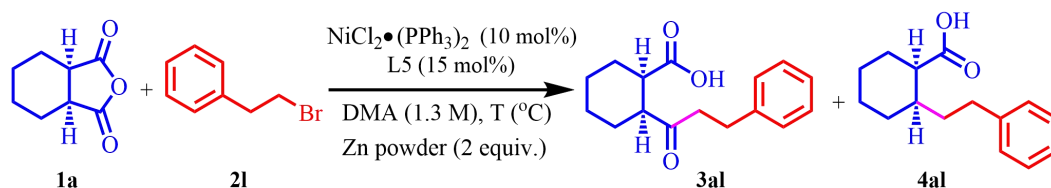

| Entry | T/°C | Yield <sup>a</sup> (%) (3al:4al) |
|-------|------|----------------------------------|
| 1     | 25   | trace                            |
| 2     | 40   | trace                            |
| 3     | 60   | trace:35                         |
| 4     | 80   | trace:57                         |
| 5     | 100  | trace:64                         |
| 6     | 120  | Trace:60                         |

<sup>a</sup>Isolated yields. Trace means the yield <5%.

#### 4.13 Table S13: Optimization of the catalyst mol% for the synthesis of β-alkylated acid derivatives

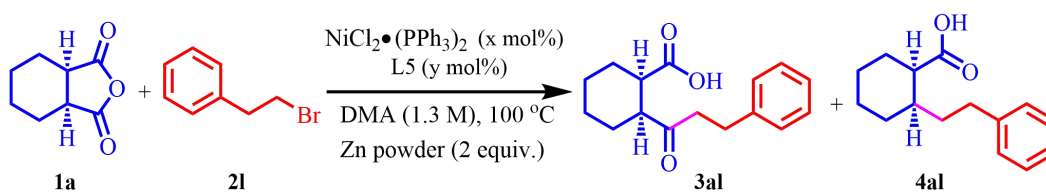

| Entry | x (mol%) | y (mol%) | Yield <sup>a</sup> (%) (3al:4al) |
|-------|----------|----------|----------------------------------|
| 1     | 5        | 7.5      | trace                            |
| 2     | 10       | 15       | trace:64                         |
| 3     | 15       | 22.5     | trace:72                         |
| 4     | 20       | 30       | trace:80                         |
| 5     | 30       | 45       | trace:78                         |

<sup>a</sup>Isolated yields. Trace means the yield <5%.

### 5. Scale-up Transformation on 10.0 mmol Scale for the Synthesis of $\gamma$ -Keto Acid 3ar

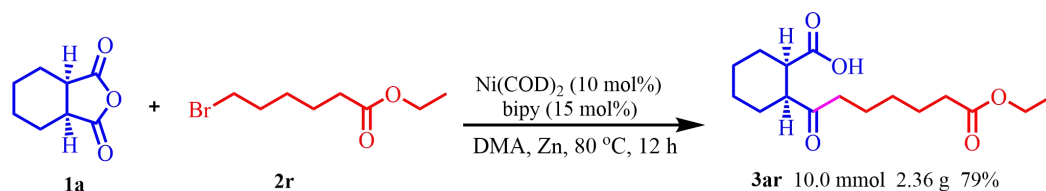

To an oven-dried microwave vial (25 mL) equipped with a stir bar (10 × 5 mm) was added Ni(COD)<sub>2</sub> (275 mg, 1.0 mmol), bipy (234 mg, 1.5 mmol) under a nitrogen atmosphere inside a glove box at 25 °C. Next, 7.5 mL of dry DMA was added via syringe to give a purple solution. After the catalyst/ligand solution was stirred for 1 h at 25 °C inside the glove box, Zn powder (1.3 g, 20 mmol, 2.0 equiv) was added to the reaction vial followed by the *cis*-1,2-cyclohexanedicarboxylic anhydride (2.31 g, 15 mmol, 1.5 equiv) and ethyl 6-bromohexanoate (1.78 mL, 10 mmol, 1.0 equiv). The microwave vial was sealed with a cap containing a rubber septum and removed from the glove box. The reaction mixture was stirred (1000 rpm) at 80 °C for 12 h. The resulting dark brown solution was then quenched by addition of 10 drops water via syringe and then the vial opened to air. The reaction mixture was passed through a short pad of silica gel and rinsed with 5 mL of ethyl acetate to afford a dark brown solution. The solvent was removed by rotary evaporator. The crude residue was purified by flash column chromatography to give **3ar** (2.36 g, 79%) as a colorless oil.

### 6. Scale-up Transformation on 10.0 mmol Scale for the Synthesis of $\beta$ -Alkylated Acid 4aa

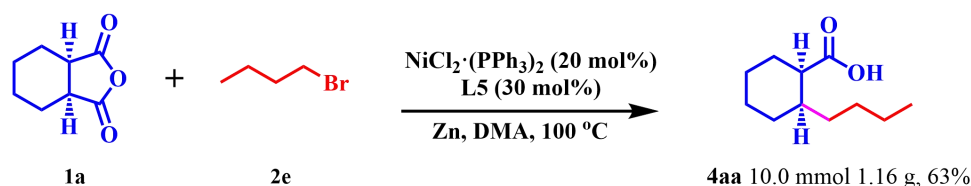

To an oven-dried microwave vial (50 mL) equipped with a stir bar (10 × 5 mm) was added NiCl<sub>2</sub>·(PPh<sub>3</sub>)<sub>2</sub> (1.31 g, 2 mmol), L5 (1.09 g, 3 mmol) under nitrogen atmosphere inside a glove box at 25 °C. Next, 20 mL of dry DMA was added via syringe to give a purple solution. After the catalyst/ligand solution was stirred for 1 h at 25 °C inside the glove box, Zn powder (1.31 g, 20 mmol, 2.0 equiv) was added to the reaction vial followed by the *cis*-1,2-cyclohexanedicarboxylic anhydride (1.54 g, 10 mmol, 1 equiv) and 1-bromobutane (2.74 g, 20 mmol, 2.0 equiv). The microwave vial was

sealed with a cap containing a rubber septum and removed from the glove box. The reaction mixture was stirred (1000 rpm) at 100 °C for 12 h. The resulting dark brown solution was then quenched by addition of 10 drops water via syringe and then the vial opened to air. The reaction mixture was passed through a short pad of silica gel and rinsed with 5 mL of ethyl acetate to afford a dark brown solution. The solvent was removed by rotary evaporator. The crude residue was purified by flash column chromatography to give **4aa** (1.16 g, 63%) as a colorless oil.

## 7. Mechanistic Studies

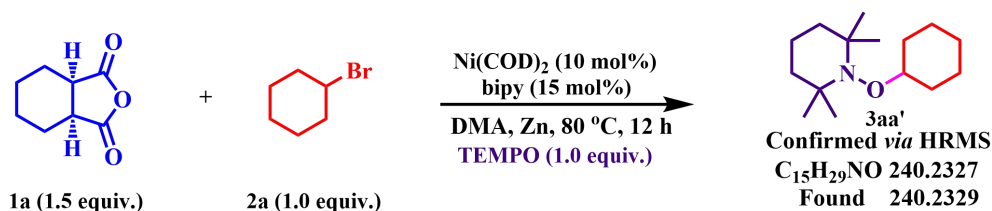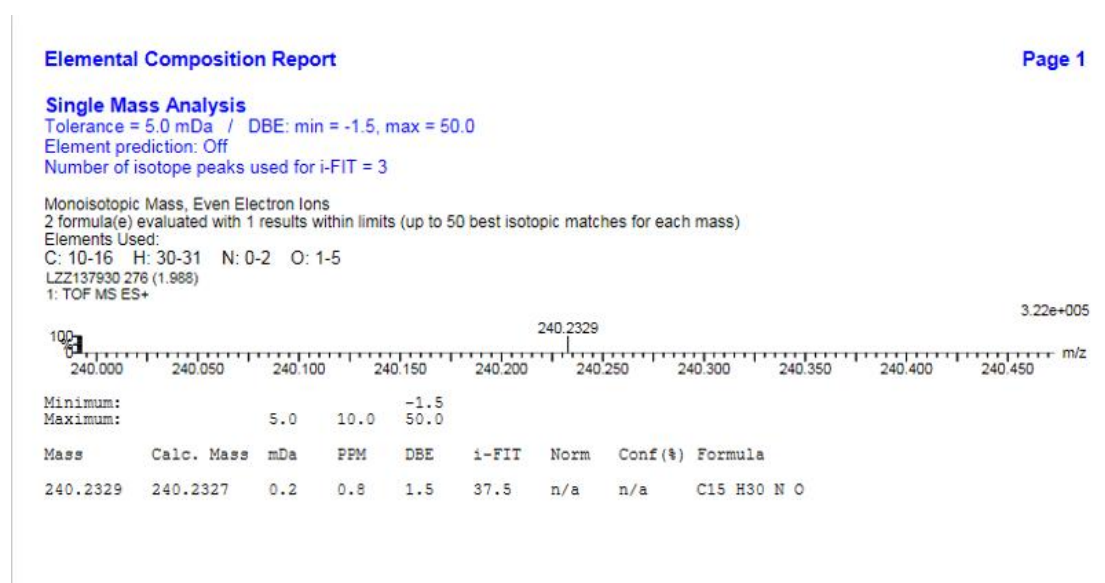

7.1 Figure S1. HRMS for **3aa'**

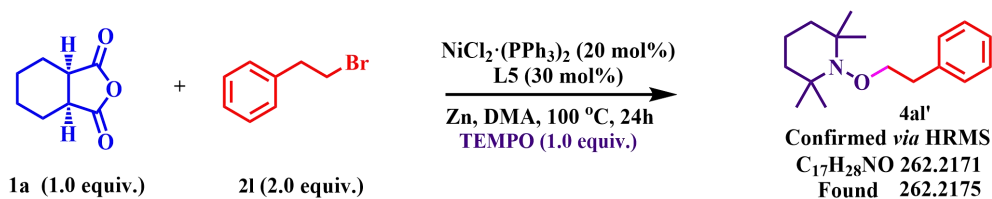

## Elemental Composition Report

Page 1

### Single Mass Analysis

Tolerance = 5.0 mDa / DBE: min = -1.5, max = 50.0

Element prediction: Off

Number of isotope peaks used for i-FIT = 3

Monoisotopic Mass, Even Electron Ions

4 formula(e) evaluated with 1 results within limits (up to 50 best isotopic matches for each mass)

Elements Used:

C: 10-17 H: 28-31 N: 0-2 O: 1-5

LZZ137930 281 (2.024)

1: TOF MS ES+

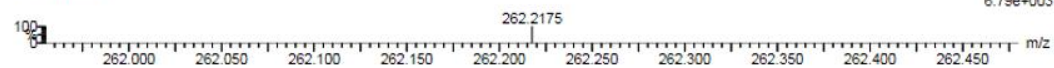

Minimum: -1.5  
Maximum: 5.0 10.0 50.0

| Mass     | Calc. Mass | mDa | PPM | DBE | i-FIT | Norm | Conf(%) | Formula     |
|----------|------------|-----|-----|-----|-------|------|---------|-------------|
| 262.2175 | 262.2171   | 0.4 | 1.5 | 4.5 | 28.1  | n/a  | n/a     | C17 H28 N O |

### 7.2 Figure S2. HRMS for 4a1'

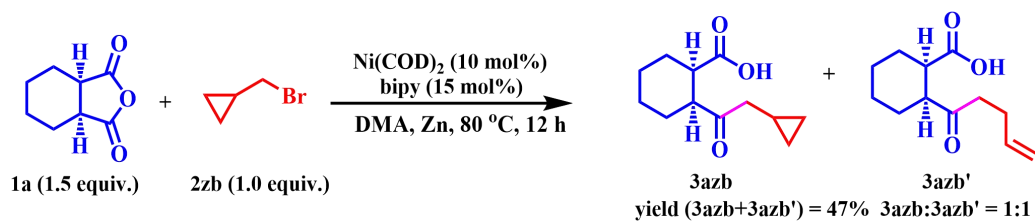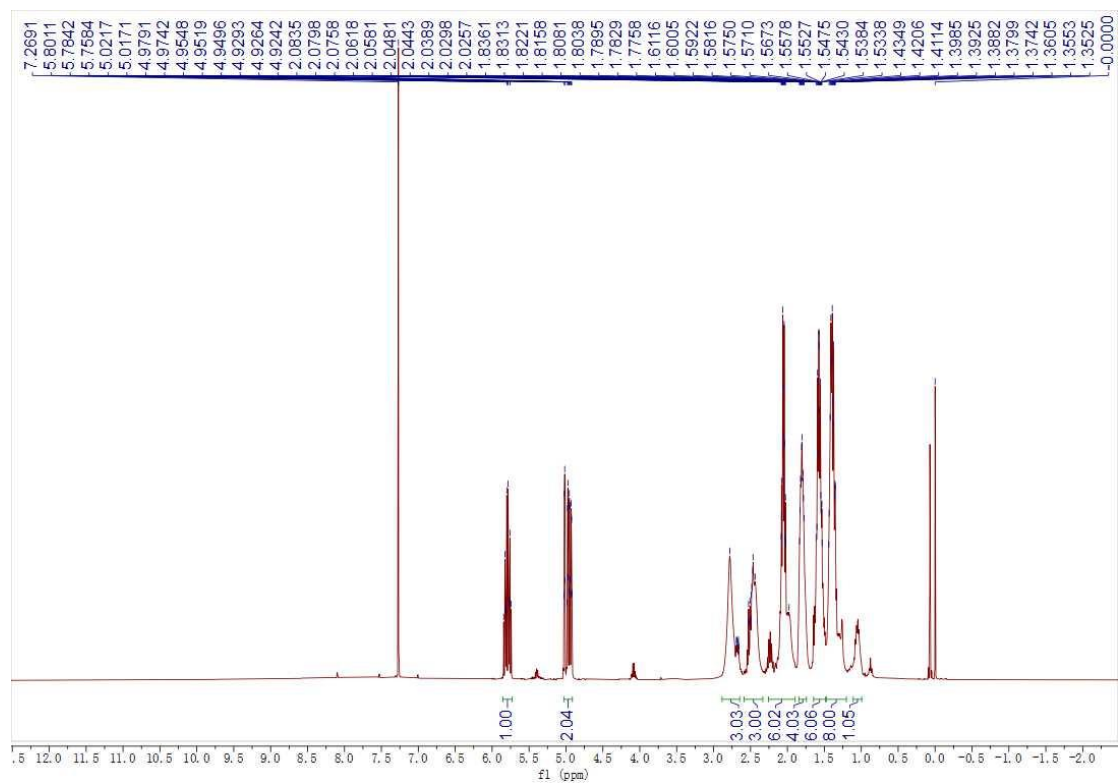

$^1\text{H NMR}$  (400 MHz, Chloroform-*d*)  $\delta$ : 7.26 – 5.01 (m, 1H,  $-\text{C}=\text{CH}-$ ), 5.03 – 4.91 (m, 2H,  $-\text{C}=\text{CH}_2$ ), 2.89 – 2.65 (m, 3H), 2.59 – 2.33 (m, 3H), 2.26 – 1.90 (m, 6H), 1.84 – 1.74 (m, 4H), 1.65 – 1.48 (m, 6H), 1.47 – 1.20 (m, 8H), 1.11 – 0.99 (m, 1H) ppm.

**7.3 Figure S3.**  $^1\text{H NMR}$  (400 MHz,  $\text{CDCl}_3$ ) for  $3\text{azc}+3\text{azc}'$

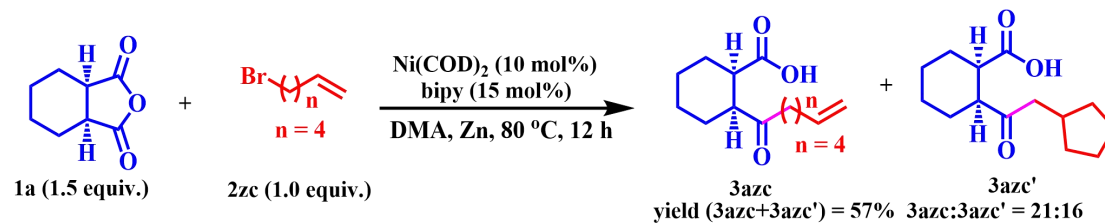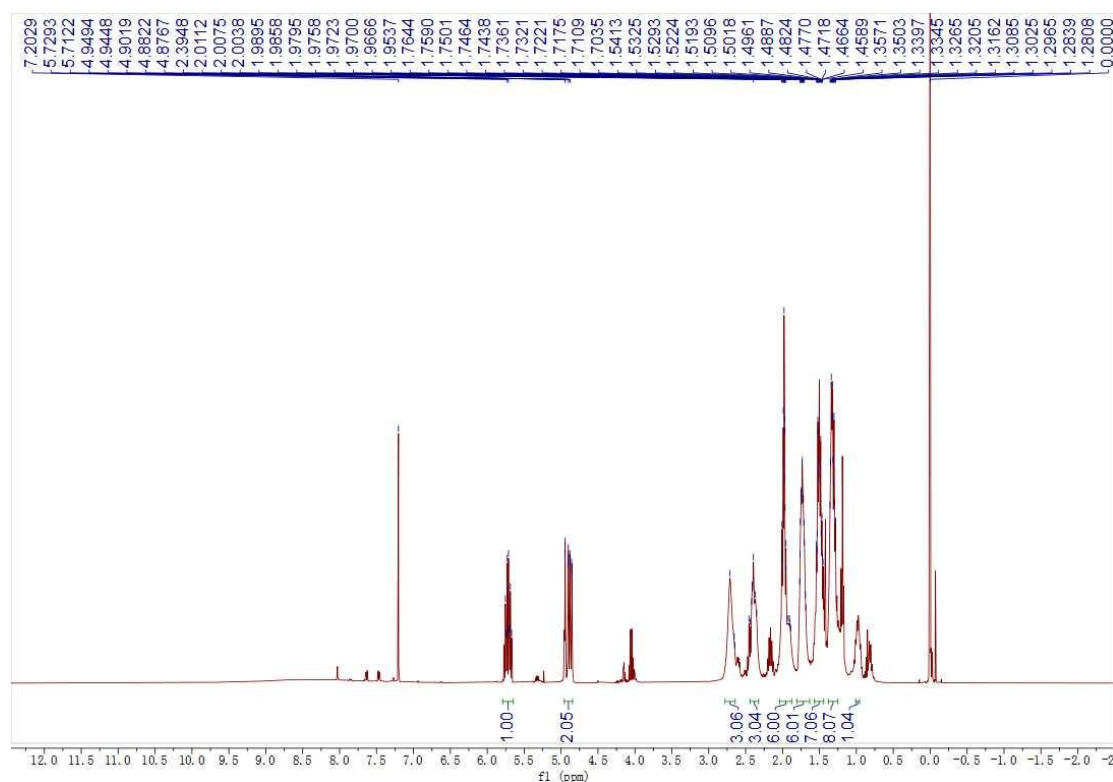

**7.4 Figure S4.**  $^1\text{H NMR}$  (400 MHz,  $\text{CDCl}_3$ ) for  $3\text{azc}+3\text{azc}'$

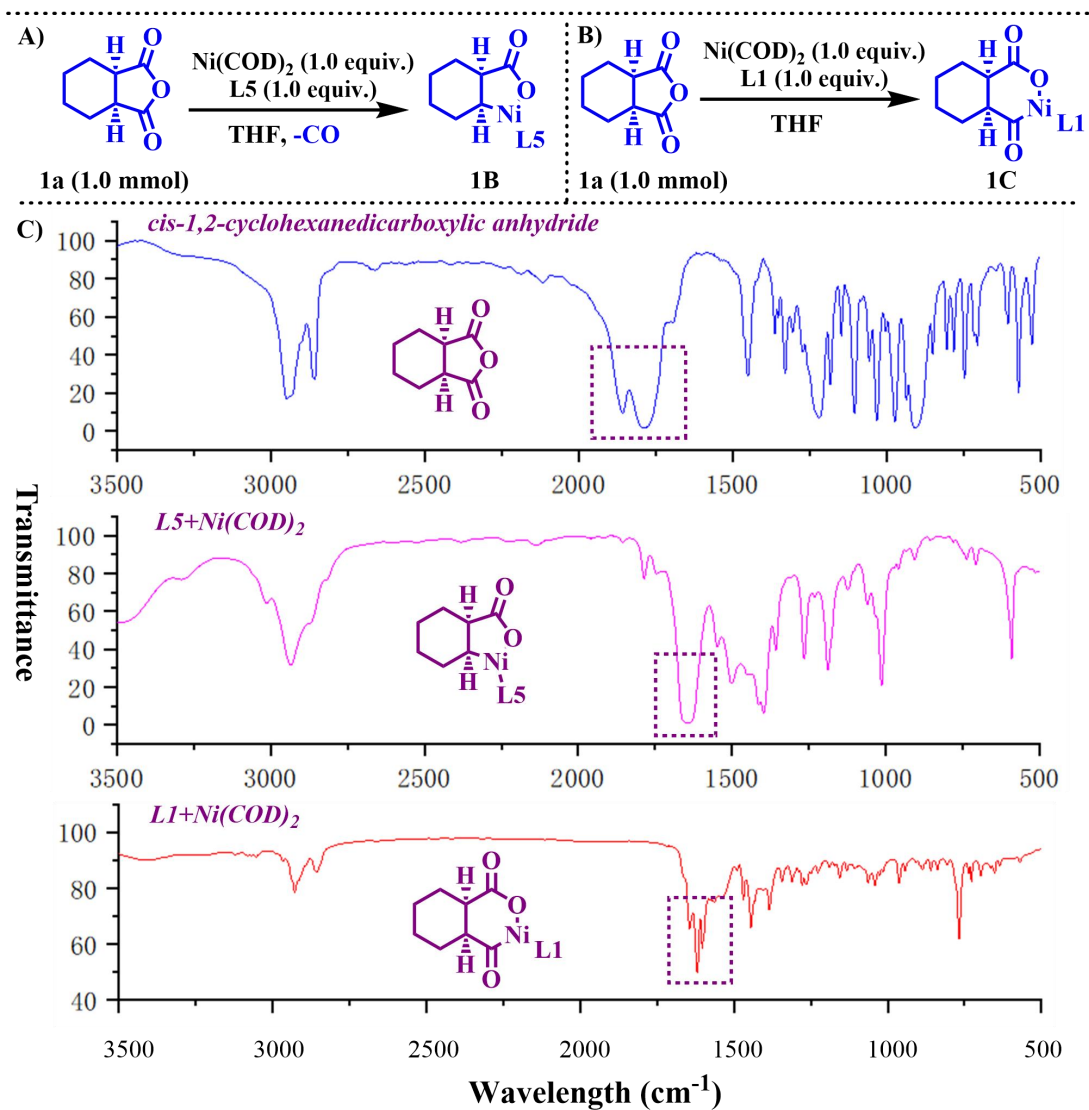

7.5 **Figure S5.** (A) Preparation of the Ni homoenolate **1B**; (B) Preparation of the alkyl nickel species **1C**; (C) Infrared spectroscopy of anhydride **1a**, **1B** and **1C** (The infrared spectra were obtained with KBr plates by using a IS10 FT-IR Spectrometer).

Elemental Composition Report

Page 1

Tolerance = 5.0 mDa / DBE: min = -1.5, max = 50.0  
 Element prediction: Off  
 Number of isotope peaks used for i-FIT = 3

Monoisotopic Mass, Even Electron Ions  
 38 formula(e) evaluated with 1 results within limits (up to 50 best isotopic matches for each mass)  
 Elements Used:  
 C: 30-30 H: 35-37 N: 1-3 O: 3-5 Ni: 0-2 Na: 1-3

20250512030 493 (3.535)  
 1: TOF MS ES+

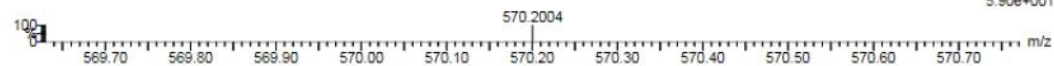

Minimum: -1.5  
 Maximum: 5.0 10.0 50.0

| Mass     | Calc. Mass | mDa  | PPM  | DBE  | i-FIT | Norm | Conf(%) | Formula             |
|----------|------------|------|------|------|-------|------|---------|---------------------|
| 570.2004 | 570.2005   | -0.1 | -0.2 | 13.5 | 17.9  | n/a  | n/a     | C30 H37 N2 O4 Ni Na |

7.6 Figure S6. HRMS for 1B

Elemental Composition Report

Page 1

Tolerance = 5.0 mDa / DBE: min = -1.5, max = 50.0  
 Element prediction: Off  
 Number of isotope peaks used for i-FIT = 3

Monoisotopic Mass, Even Electron Ions  
 54 formula(e) evaluated with 1 results within limits (up to 50 best isotopic matches for each mass)  
 Elements Used:  
 C: 18-18 H: 17-19 N: 1-3 O: 2-4 Na: 1-3 Ni: 0-2

20250512030 245 (1.767)  
 1: TOF MS ES+

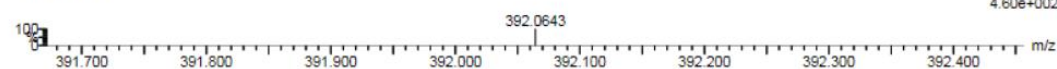

Minimum: -1.5  
 Maximum: 5.0 10.0 50.0

| Mass     | Calc. Mass | mDa  | PPM  | DBE  | i-FIT | Norm | Conf(%) | Formula             |
|----------|------------|------|------|------|-------|------|---------|---------------------|
| 392.0643 | 392.0647   | -0.4 | -1.0 | 10.5 | 22.4  | n/a  | n/a     | C18 H19 N2 O3 Na Ni |

7.7 Figure S7. HRMS for 1C

7.8 Table S13: Selectivity in oxidative addition to (L)Ni<sup>0</sup>. Percent of remaining 1a and 2l with yield of 3al

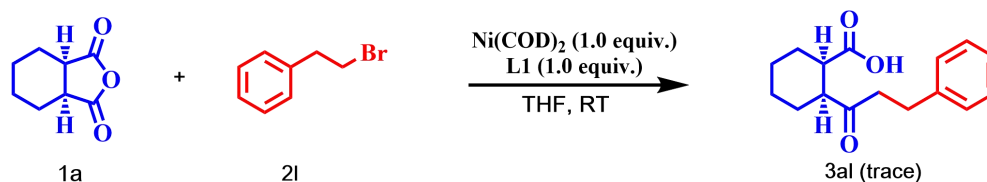

| entry | t (h) | 1a   | 2l   | 3al |
|-------|-------|------|------|-----|
| 1     | 1     | 0.8  | 1    | 0   |
| 2     | 2     | 0.74 | 0.97 | 0   |
| 3     | 3     | 0.57 | 0.95 | 0   |
| 4     | 4     | 0.46 | 0.91 | 0   |

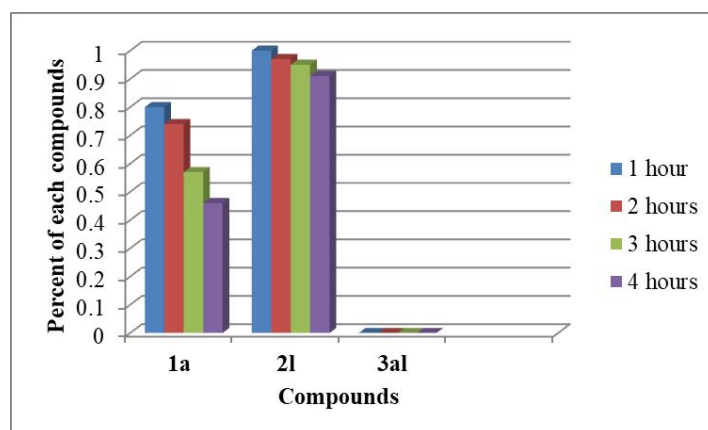

7.9 Table S14: Selectivity in oxidative addition to  $(L)Ni^0$ . Percent of remaining 1a and 2l with yield of 4al

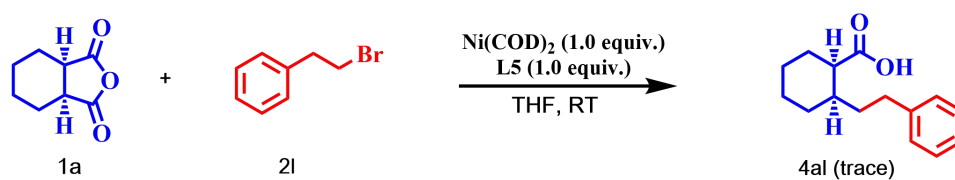

| entry | t (h) | 1a   | 2l   | 4al |
|-------|-------|------|------|-----|
| 1     | 1     | 0.92 | 0.97 | 0   |
| 2     | 2     | 0.87 | 0.95 | 0   |
| 3     | 3     | 0.76 | 0.93 | 0   |
| 4     | 4     | 0.55 | 0.9  | 0   |

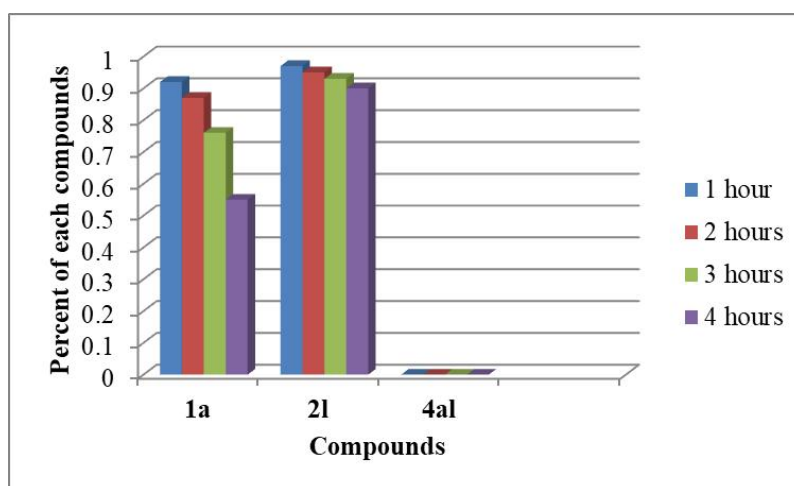

7.10 Table S15: Selectivity in oxidative addition to  $(L)Ni^{II}$ . Percent of remaining 1a and 2l with yield of 4al

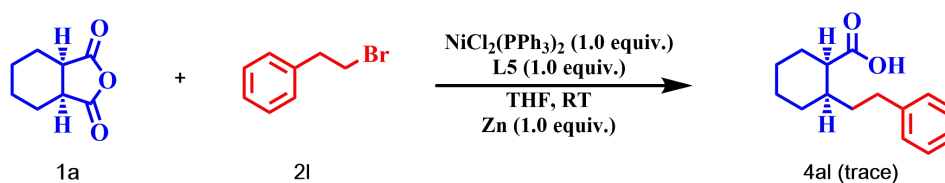

| entry | t (h) | 1a   | 2l   | 4al |
|-------|-------|------|------|-----|
| 1     | 1     | 0.76 | 1    | 0   |
| 2     | 2     | 0.63 | 0.96 | 0   |
| 3     | 3     | 0.47 | 0.94 | 0   |
| 4     | 4     | 0.36 | 0.89 | 0   |

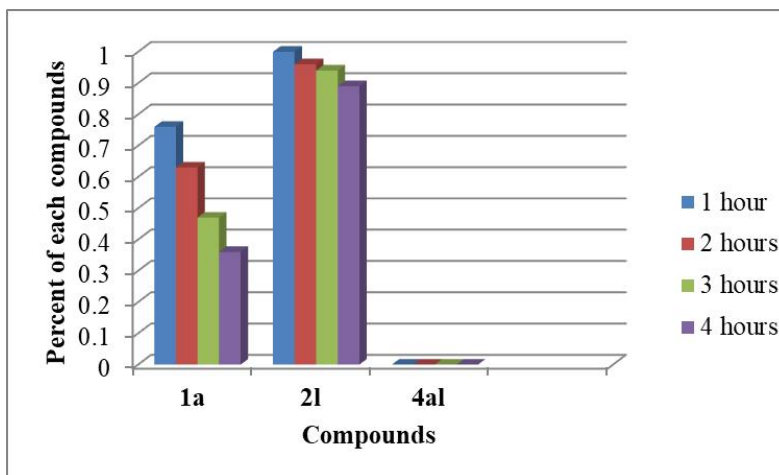

### 7.11 Procedures for the synthesis of $[(dtbbpy)Ni^I Cl]_2$

To a 20 mL vial with septum cap containing a stir bar was added  $Ni(COD)_2$  (100 mg, 0.36 mmol) and dtbbpy ligand (98 mg, 0.36 mmol, 1 equiv) in a nitrogen-filled glovebox. 10 mL of diethyl ether was added via syringe transfer. The contents were stirred for 10 minutes and the solution turned to a dark purple color. Chlorobenzene (3.7 mL, 36.4 mmol, 100 equiv) was added via syringe. The vial was then capped and stirred at room temperature for 16 hours.

After 16 hours, the now deep red solution was evaporated to dryness under reduced pressure in the glovebox. Approximately 10 mL of pentane was then added, and the suspension was stirred for 10 minutes. The brick-red solids were isolated through filtration, and the crude was used without further purification.

The spectroscopic data for the complex matches the report from the literature, with the leftover of chlorobenzene as the major impurity.

$^1H$  NMR (500 MHz,  $CD_3CN$ )  $\delta$ : 140.41 (brs, 1H), 58.79 (brs, 2H), 41.60 (brs, 1H), 3.65 (brs, 4H), 1.80 (brs, 4H, possibly overlapped with the  $CD_3CN$  peak), 1.42 (brs, 36H).

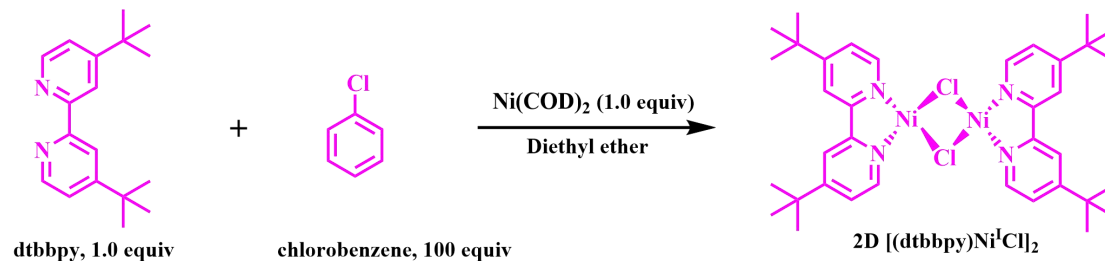

### 7.12 Procedures for the reactivity test of cyclic anhydrides and alkyl bromides using the $[(dtbbpy)Ni^I Cl]_2$ complex.

Note: the mass of  $[(dtbbpy)Ni^I Cl]_2$  complex added was adjusted based on the chlorobenzene leftover as detected by  $^1H$  NMR.

To an 8 mL vial with septum cap containing a stir bar was added [(dtbbpy)Ni<sup>I</sup>Cl]<sub>2</sub> (36.2 mg, 0.1 mmol, 1 equiv of Ni<sup>I</sup>), cyclic anhydride **1a** (23.12 mg, 0.15 mmol, 1.5 equiv) and alkyl bromide **2l** (13.6 μL, 0.1 mmol, 1 equiv) in a nitrogen-filled glovebox. 1 mL of anhydrous THF was added via syringe transfer. The resulting content was stirred for 5 minutes and showed as a red mixture. 200 μL of the content was transferred to a 4 mL vial with septum cap containing a stir bar via a micro pipette, and 4 reaction vials were prepared in the same way. The reaction vials were then capped and brought out of the glovebox.

The vials were stirred at room temperature, and each vial was stopped at the target time points in a four-hour time period. The vial was opened to expose to air and filtered through a pad of silica gel with an extra 2 mL of rinse of ethyl acetate. The resulting solution was analyzed through GC-MS with 4,4'-di-tert-butylbiphenyl as an internal standard.

**7.13 Table S16: Selectivity in oxidative addition to (L)Ni<sup>I</sup> at room temperature. Percent of remaining 1a and 2l with yield of 4al**

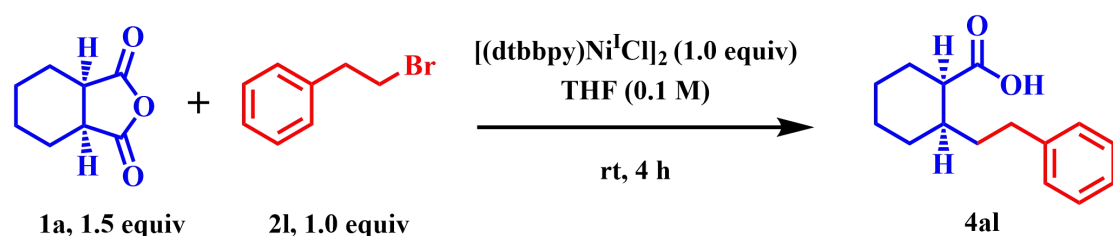

| entry | t (h) | 1a   | 2l   | 4al |
|-------|-------|------|------|-----|
| 1     | 1     | 1    | 0.95 | 0   |
| 2     | 2     | 0.98 | 0.90 | 0   |
| 3     | 3     | 0.95 | 0.87 | 0   |
| 4     | 4     | 0.94 | 0.85 | 0   |

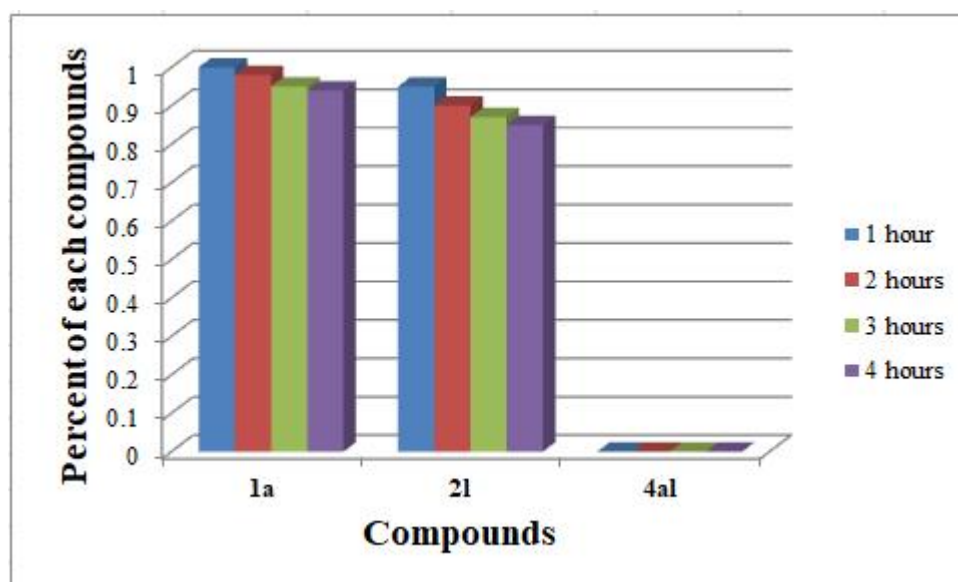

**7.14 Table S17: Selectivity in oxidative addition to (L)Ni<sup>I</sup> at 40 °C heating. Percent of remaining 1a and 2l with yield of 4al**

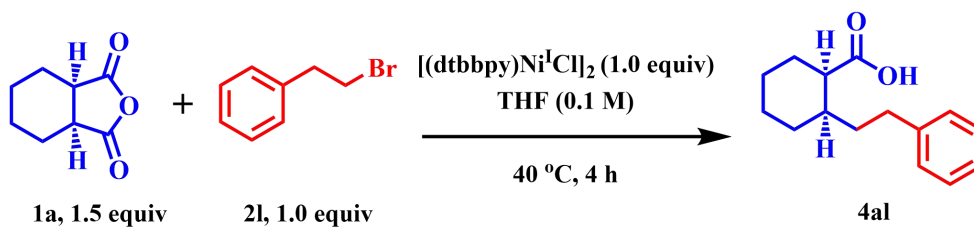

| entry | t (h) | <b>1a</b> | <b>2l</b> | <b>4al</b> |
|-------|-------|-----------|-----------|------------|
| 1     | 1     | 1.0       | 0.79      | 0          |
| 2     | 2     | 0.91      | 0.62      | 0          |
| 3     | 3     | 0.83      | 0.43      | 0          |
| 4     | 4     | 0.75      | 0.36      | 0          |

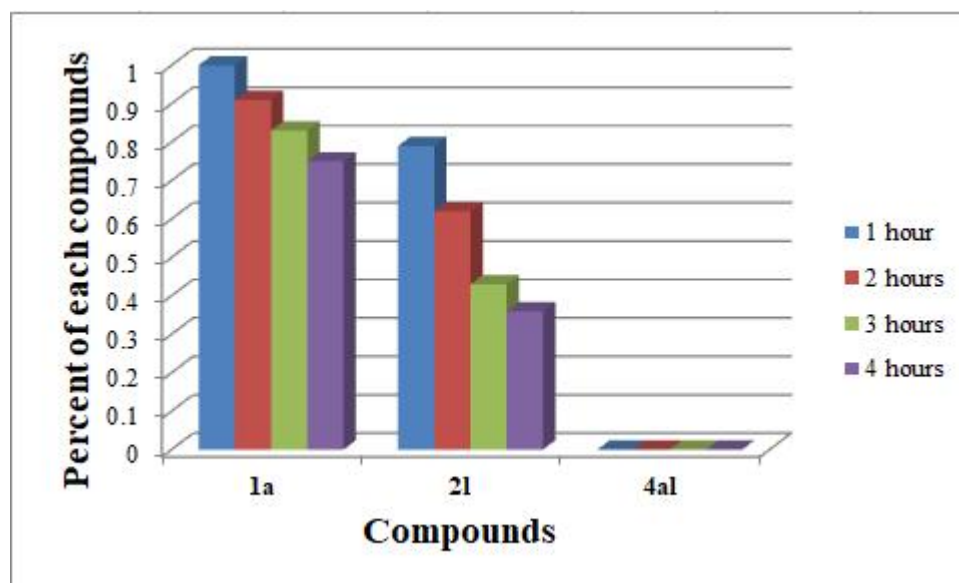

## 8. Characterization Data for All Products

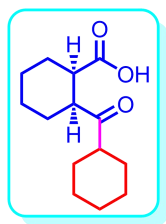

**Cis-2-(cyclohexanecarbonyl)cyclohexane-1-carboxylic acid (3aa).** The reaction was performed following the General Procedure A with Ni(COD)<sub>2</sub> (8.3 mg, 0.03 mmol), bipy (7.0 mg, 0.045 mmol), **1a** (69.4 mg, 0.45 mmol), Zn powder (39.2 mg, 0.6 mmol), and bromocyclohexane (**2a**) (36.9  $\mu$ L, 0.3 mmol). The crude product was purified by flash chromatography on silica gel (eluted with Petroleum ether:EtOAc = 5:1) to give the product (54.3 mg, 76% yield) as a white solid. Mp 31.9 – 32.6 °C.  $R_f$  = 0.50 (Petroleum ether:EtOAc = 2:1). <sup>1</sup>H NMR (400 MHz, CDCl<sub>3</sub>)  $\delta$ : 10.63 (s, 1H), 3.03 – 3.00 (m, 1H), 2.64 – 2.56 (m, 2H), 2.06 – 2.03 (m, 2H), 1.81 – 1.65 (m, 5H), 1.65 – 1.64 (m, 3H), 1.43 – 1.23 (m, 8H) ppm. <sup>13</sup>C{<sup>1</sup>H} NMR (101 MHz, CDCl<sub>3</sub>)  $\delta$ : 214.9, 180.5, 47.6, 47.3, 42.4, 29.3, 28.1, 26.3, 25.9, 25.8, 25.4, 25.3, 24.2, 23.2 ppm. IR(neat): 3385, 2930, 2857, 1725, 1697, 1683, 1450, 1311, 1294, 1264, 1143, 995, 950, 923, 738, 540. HRMS: calcd for C<sub>14</sub>H<sub>23</sub>O<sub>3</sub> [M+H]<sup>+</sup> 239.1647, found 239.1644.

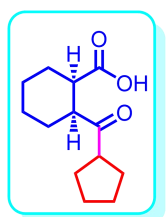

**Cis-2-(cyclopentanecarbonyl)cyclohexane-1-carboxylic acid (3ab).** The reaction was performed following the General Procedure A with Ni(COD)<sub>2</sub> (8.3 mg, 0.03 mmol), bipy (7.0 mg, 0.045 mmol), **1a** (69.4 mg, 0.45 mmol), Zn powder (39.2 mg, 0.6 mmol), and bromocyclopentane (**2b**) (32.2  $\mu$ L, 0.3 mmol). The crude product was purified by flash chromatography on silica gel (eluted with Petroleum ether:EtOAc = 5:1) to give the product (51.8 mg, 77% yield) as a white solid. Mp 31.1 – 31.8 °C.  $R_f$  = 0.47 (Petroleum ether:EtOAc = 2:1). <sup>1</sup>H NMR (400 MHz, CDCl<sub>3</sub>)  $\delta$ : 3.07 – 3.03 (m, 1H), 2.97 – 2.96 (m, 1H), 2.68 – 2.66 (m, 1H), 2.07 – 2.03 (m, 2H), 1.82 – 1.78 (m, 3H), 1.68 – 1.63 (m, 6H), 1.56 – 1.52 (m, 2H), 1.42 – 1.34 (m, 3H) ppm. <sup>13</sup>C{<sup>1</sup>H} NMR (101 MHz, CDCl<sub>3</sub>)  $\delta$ : 214.8, 180.4, 48.7, 48.2, 42.4, 30.4, 28.9, 26.2, 26.0, 25.5, 24.1, 23.4 ppm. One resonance was not observed due to overlapping resonances. IR(neat): 3380, 2943, 2868, 2718, 2610, 1721, 1684, 1454, 1416, 1311, 1265, 1084, 1015, 950, 862, 737, 533. HRMS: calcd for C<sub>13</sub>H<sub>21</sub>O<sub>3</sub> [M+H]<sup>+</sup> 225.1491, found 225.1487.

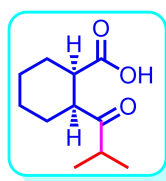

**Cis-2-isobutyrylcyclohexane-1-carboxylic acid (3ac).** The reaction was performed following the General Procedure A with Ni(COD)<sub>2</sub> (8.3 mg, 0.03 mmol), bipy (7.0 mg, 0.045 mmol), **1a** (69.4 mg, 0.45 mmol), Zn powder (39.2 mg, 0.6 mmol), and 2-bromopropane (**2c**) (28.2  $\mu$ L, 0.3 mmol). The crude product was purified by flash chromatography on silica gel (eluted with Petroleum ether:EtOAc = 5:1) to give the product (48.2 mg, 81% yield) as a white solid. Mp 31.6 – 31.9 °C.  $R_f$  = 0.48 (Petroleum ether:EtOAc = 2:1). <sup>1</sup>H NMR (400 MHz, CDCl<sub>3</sub>)  $\delta$ : 3.03 – 2.84 (m, 1H), 2.84 – 2.81 (m, 1H), 2.67 – 2.64 (m, 1H), 2.07 – 2.00 (m, 2H), 1.81 – 1.78 (m, 2H), 1.63 – 1.61 (m, 1H), 1.44 – 1.31 (m, 3H), 1.07 – 1.01 (m, 6H) ppm. <sup>13</sup>C{<sup>1</sup>H} NMR (101 MHz, CDCl<sub>3</sub>)  $\delta$ : 216.0, 180.4, 47.3, 42.4, 37.4, 26.2, 25.3, 24.1, 23.2, 19.1, 18.1 ppm. IR(neat): 3385, 2930, 2613, 1722, 1685, 1450, 1311, 1264, 1143, 1078, 995, 923, 871, 738, 540. HRMS: calcd for C<sub>11</sub>H<sub>19</sub>O<sub>3</sub> [M+H]<sup>+</sup> 199.1334, found 199.1332.

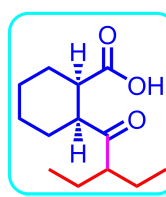

**Cis-2-(2-ethylbutanoyl)cyclohexane-1-carboxylic acid (3ad).** The reaction was performed following the General Procedure A with Ni(COD)<sub>2</sub> (8.3 mg, 0.03 mmol), bipy (7.0 mg, 0.045 mmol), **1a** (69.4 mg, 0.45 mmol), Zn powder (39.2 mg, 0.6 mmol), and 3-bromopentane (**2d**) (37.3  $\mu$ L, 0.3 mmol). The crude product was purified by flash chromatography on silica gel (eluted with Petroleum ether:EtOAc = 5:1) to give the product (61.1 mg, 90% yield) as a white solid. Mp 30.4 – 31.0 °C.  $R_f$  = 0.56 (Petroleum ether:EtOAc = 2:1). <sup>1</sup>H NMR (400 MHz, CDCl<sub>3</sub>)  $\delta$ : 3.00 – 2.98 (m, 1H), 2.59 –

2.54 (m, 2H), 2.09 – 2.04 (m, 2H), 1.84 – 1.75 (m, 2H), 1.66 – 1.60 (m, 3H), 1.43 – 1.32 (m, 5H), 0.85 – 0.79 (m, 6H) ppm.  $^{13}\text{C}\{^1\text{H}\}$  NMR (101 MHz,  $\text{CDCl}_3$ )  $\delta$ : 215.0, 180.5, 51.3, 48.8, 42.2, 26.1, 25.3, 24.7, 24.3, 23.3, 22.8, 12.0, 11.2 ppm. IR(neat): 3382, 2964, 2874, 2673, 1722, 1682, 1457, 1423, 1312, 1265, 1166, 1014, 962, 924, 846, 742, 543. HRMS: calcd for  $\text{C}_{13}\text{H}_{23}\text{O}_3$   $[\text{M}+\text{H}]^+$  227.1647, found 227.1644.

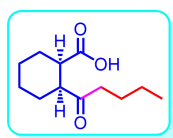

**Cis-2-pentanoylcyclohexane-1-carboxylic acid (3ae).** The reaction was performed following the General Procedure A with  $\text{Ni}(\text{COD})_2$  (8.3 mg, 0.03 mmol), bipy (7.0 mg, 0.045 mmol), **1a** (69.4 mg, 0.45 mmol), Zn powder (39.2 mg, 0.6 mmol), and 1-bromobutane (**2e**) (32.2  $\mu\text{L}$ , 0.3 mmol). The crude product was purified by flash chromatography on silica gel (eluted with Petroleum ether:EtOAc = 5:1) to give the product (51.6 mg, 81% yield) as a colorless oil.  $R_f$  = 0.61 (Petroleum ether:EtOAc = 2:1). The spectroscopic data for this product match the literature data<sup>1</sup>.

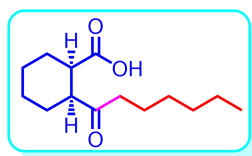

**Cis-2-heptanoylcyclohexane-1-carboxylic acid (3af).** The reaction was performed following the General Procedure A with  $\text{Ni}(\text{COD})_2$  (8.3 mg, 0.03 mmol), bipy (7.0 mg, 0.045 mmol), **1a** (69.4 mg, 0.45 mmol), Zn powder (39.2 mg, 0.6 mmol), and 1-bromohexane (**2f**) (42.1  $\mu\text{L}$ , 0.3 mmol). The crude product was purified by flash chromatography on silica gel (eluted with Petroleum ether:EtOAc = 5:1) to give the product (50.5 mg, 70% yield) as a colorless oil.  $R_f$  = 0.60 (Petroleum ether:EtOAc = 2:1).  $^1\text{H}$  NMR (400 MHz,  $\text{CDCl}_3$ )  $\delta$ : 2.79 – 2.72 (m, 2H), 2.45 – 2.41 (m, 2H), 2.06 – 1.99 (m, 2H), 1.80 – 1.77 (m, 2H), 1.55 – 1.51 (m, 3H), 1.40 – 1.39 (m, 3H), 1.28 – 1.24 (m, 6H), 0.87 (t,  $J$  = 6.9 Hz, 3H) ppm.  $^{13}\text{C}\{^1\text{H}\}$  NMR (101 MHz,  $\text{CDCl}_3$ )  $\delta$ : 211.9, 180.4, 49.2, 42.3, 40.0, 31.6, 28.8, 26.1, 25.7, 23.9, 23.5, 23.4, 22.5, 14.0 ppm. IR(neat): 3600, 2962, 2581, 1722, 1683, 1466, 1249, 1127, 933, 888, 725, 612, 573. HRMS: calcd for  $\text{C}_{14}\text{H}_{25}\text{O}_3$   $[\text{M}+\text{H}]^+$  241.1804, found 241.1802.

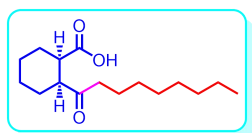

**Cis-2-nonanoylcyclohexane-1-carboxylic acid (3ag).** The reaction was performed following the General Procedure A with  $\text{Ni}(\text{COD})_2$  (8.3 mg, 0.03 mmol), bipy (7.0 mg, 0.045 mmol), **1a** (69.4 mg, 0.45 mmol), Zn powder (39.2 mg, 0.6 mmol), and 1-bromooctane (**2g**) (51.8  $\mu\text{L}$ , 0.3 mmol). The crude product was purified by flash chromatography on silica gel (eluted with Petroleum ether:EtOAc = 5:1) to give the product (67.6 mg, 84% yield) as a white solid. Mp 29.7 – 30.1  $^\circ\text{C}$ .  $R_f$  = 0.73 (Petroleum ether:EtOAc = 2:1).  $^1\text{H}$  NMR (400 MHz,  $\text{CDCl}_3$ )  $\delta$ : 2.81 – 2.74 (m, 2H), 2.45 – 2.41 (m, 2H), 2.07 – 1.98 (m, 2H), 1.81 – 1.73 (m, 2H), 1.55 – 1.51 (m, 3H), 1.41 – 1.38 (m, 3H), 1.29 – 1.24 (m, 10H), 0.85 (t,  $J$  = 6.5 Hz, 3H) ppm.  $^{13}\text{C}\{^1\text{H}\}$  NMR (101 MHz,  $\text{CDCl}_3$ )  $\delta$ : 212.0, 180.3, 49.2, 42.3, 40.0, 31.8, 29.4, 29.2, 29.1, 26.1, 25.7, 24.0, 23.6, 23.5, 22.6, 14.1 ppm. IR(neat): 3445, 2929, 2804, 1723, 1684, 1645, 1635, 1452, 1306, 1125, 750, 642, 523, 466, 434, 423, 415, 411. HRMS: calcd for  $\text{C}_{16}\text{H}_{29}\text{O}_3$   $[\text{M}+\text{H}]^+$  269.2117, found 269.2114.

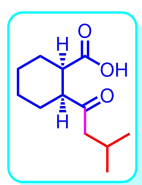

**Cis-2-(3-methylbutanoyl)cyclohexane-1-carboxylic acid (3ah).** The reaction was performed following the General Procedure A with  $\text{Ni}(\text{COD})_2$  (8.3 mg, 0.03 mmol), bipy (7.0 mg, 0.045 mmol), **1a** (69.4 mg, 0.45 mmol), Zn powder (39.2 mg, 0.6 mmol), and 1-bromo-2-methyl-propan (**2h**) (32.6  $\mu\text{L}$ , 0.3 mmol). The crude product was purified by flash chromatography on silica gel (eluted with Petroleum ether:EtOAc = 5:1) to give the product (46.5 mg, 73% yield) as a white solid. Mp 31.3 – 31.8  $^\circ\text{C}$ .  $R_f$  = 0.56 (Petroleum ether:EtOAc = 2:1).  $^1\text{H}$  NMR (400 MHz,  $\text{CDCl}_3$ )  $\delta$ : 2.80 – 2.77 (m, 1H), 2.71 – 2.70 (m, 1H), 2.33 –

2.30 (m, 2H), 2.16 – 2.12 (m, 1H), 2.04 – 2.01 (m, 2H), 1.81 – 1.77 (m, 2H), 1.60 – 1.58 (m, 1H), 1.38 – 1.35 (m, 3H), 0.89 (d,  $J = 2.9$  Hz, 3H), 0.87 (d,  $J = 2.9$  Hz, 3H) ppm.  $^{13}\text{C}\{^1\text{H}\}$  NMR (101 MHz,  $\text{CDCl}_3$ )  $\delta$ : 211.5, 180.5, 49.5, 49.1, 42.4, 26.2, 25.7, 24.2, 24.1, 23.4, 22.6, 22.5 ppm. IR(neat): 3455, 1728, 1680, 1636, 1450, 1366, 1170, 870, 433, 425, 417, 410. HRMS: calcd for  $\text{C}_{12}\text{H}_{21}\text{O}_3$   $[\text{M}+\text{H}]^+$  213.1491, found 213.1486.

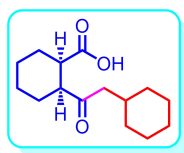

**Cis-2-(2-cyclohexylacetyl)cyclohexane-1-carboxylic acid (3ai).** The reaction was performed following the General Procedure A with  $\text{Ni}(\text{COD})_2$  (8.3 mg, 0.03 mmol), bipy (7.0 mg, 0.045 mmol), **1a** (69.4 mg, 0.45 mmol), Zn powder (39.2 mg, 0.6 mmol), and cyclohexylmethyl bromide (**2i**) (41.9  $\mu\text{L}$ , 0.3 mmol). The crude product was purified by flash chromatography on silica gel (eluted with Petroleum ether:EtOAc = 5:1) to give the product (68.9 mg, 91% yield) as a white solid. Mp 31.4 – 31.9  $^\circ\text{C}$ .  $R_f = 0.52$  (Petroleum ether:EtOAc = 2:1).  $^1\text{H}$  NMR (400 MHz,  $\text{CDCl}_3$ )  $\delta$ : 2.79 – 2.78 (m, 1H), 2.69 – 2.62 (m, 1H), 2.37 – 2.22 (m, 2H), 2.07 – 2.03 (m, 2H), 1.79 – 1.77 (m, 3H), 1.66 – 1.64 (m, 6H), 1.41 – 1.30 (m, 3H), 1.27 – 1.21 (m, 2H), 1.16 – 1.09 (m, 1H), 0.93 – 0.83 (m, 2H) ppm.  $^{13}\text{C}\{^1\text{H}\}$  NMR (101 MHz,  $\text{CDCl}_3$ )  $\delta$ : 211.5, 180.3, 49.6, 47.7, 42.3, 33.4, 33.2, 33.1, 26.3, 26.12, 26.09, 25.6, 24.1, 23.4 ppm. One resonance was not observed due to overlapping resonances. IR(neat): 3389, 2854, 2559, 1725, 1685, 1448, 1262, 1149, 1018, 964, 895, 848, 768, 728, 637, 524, 411. HRMS: calcd for  $\text{C}_{15}\text{H}_{25}\text{O}_3$   $[\text{M}+\text{H}]^+$  253.1804, found 253.1799.

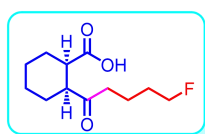

**Cis-2-(5-fluoropentanoyl)cyclohexane-1-carboxylic acid (3aj).** The reaction was performed following the General Procedure A with  $\text{Ni}(\text{COD})_2$  (8.3 mg, 0.03 mmol), bipy (7.0 mg, 0.045 mmol), **1a** (69.4 mg, 0.45 mmol), Zn powder (39.2 mg, 0.6 mmol), and 1-bromo-4-fluorobutane (**2j**) (32.2  $\mu\text{L}$ , 0.3 mmol). The crude product was purified by flash chromatography on silica gel (eluted with Petroleum ether:EtOAc = 5:1) to give the product (42.8 mg, 62% yield) as a colorless oil.  $R_f = 0.52$  (Petroleum ether:EtOAc = 2:1).  $^1\text{H}$  NMR (400 MHz,  $\text{CDCl}_3$ )  $\delta$ : 4.49 (t,  $J = 5.6$  Hz, 1H), 4.37 (t,  $J = 5.7$  Hz, 1H), 2.78 – 2.70 (m, 2H), 2.58 – 2.51 (m, 2H), 2.09 – 1.98 (m, 2H), 1.81 – 1.76 (m, 2H), 1.69 – 1.66 (m, 4H), 1.62 – 1.57 (m, 1H), 1.41 – 1.40 (m, 3H) ppm.  $^{13}\text{C}\{^1\text{H}\}$  NMR (101 MHz,  $\text{CDCl}_3$ )  $\delta$ : 211.3, 180.3, 83.9 (d,  $J_{\text{C-F}} = 165.2$  Hz), 49.2, 42.4, 39.3, 29.7 (d,  $J_{\text{C-F}} = 19.7$  Hz), 26.0, 25.8, 23.9, 23.4, 19.3 (d,  $J_{\text{C-F}} = 5.1$  Hz) ppm.  $^{19}\text{F}$  NMR (376 MHz, Chloroform- $d$ )  $\delta$ : -218.3 (s, 1F). IR(neat): 3648, 3154, 2827, 1722, 1683, 1668, 1615, 1452, 1307, 996, 749, 627, 518, 492, 448, 441, 424, 417. HRMS: calcd for  $\text{C}_{12}\text{H}_{20}\text{FO}_3$   $[\text{M}+\text{H}]^+$  231.1396, found 231.1398.

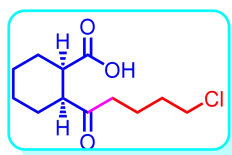

**Cis-2-(5-chloropentanoyl)cyclohexane-1-carboxylic acid (3ak).** The reaction was performed following the General Procedure A with  $\text{Ni}(\text{COD})_2$  (8.3 mg, 0.03 mmol), bipy (7.0 mg, 0.045 mmol), **1a** (69.4 mg, 0.45 mmol), Zn powder (39.2 mg, 0.6 mmol), and 1-bromo-4-chlorobutane (**2k**) (34.6  $\mu\text{L}$ , 0.3 mmol). The crude product was purified by flash chromatography on silica gel (eluted with Petroleum ether:EtOAc = 5:1) to give the product (52.6 mg, 71% yield) as a colorless oil.  $R_f = 0.53$  (Petroleum ether:EtOAc = 2:1).  $^1\text{H}$  NMR (400 MHz,  $\text{CDCl}_3$ )  $\delta$ : 3.51 (t,  $J = 6.2$  Hz, 2H), 2.77 – 2.66 (m, 2H), 2.51 – 2.47 (m, 2H), 2.08 – 1.95 (m, 2H), 1.81 – 1.66 (m, 6H), 1.65 – 1.56 (m, 1H), 1.40 – 1.39 (m, 3H) ppm.  $^{13}\text{C}\{^1\text{H}\}$  NMR (101 MHz,  $\text{CDCl}_3$ )  $\delta$ : 211.2, 180.4, 49.1, 44.7, 42.4, 38.9, 31.8, 26.0, 25.8, 23.9, 23.4, 20.8 ppm. IR(neat): 3646, 3158, 2064, 1720, 1686, 1667, 1447, 1307, 1127, 722, 648, 514, 482, 448, 425, 410. HRMS: calcd for  $\text{C}_{12}\text{H}_{20}\text{ClO}_3$   $[\text{M}+\text{H}]^+$  247.1101, found 247.1103.

**Cis-2-(3-phenylpropanoyl)cyclohexane-1-carboxylic acid (3al).** The reaction was performed

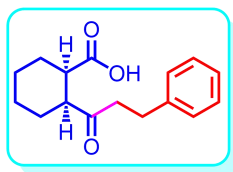

following the General Procedure A with Ni(COD)<sub>2</sub> (8.3 mg, 0.03 mmol), bipy (7.0 mg, 0.045 mmol), **1a** (69.4 mg, 0.45 mmol), Zn powder (39.2 mg, 0.6 mmol), and (2-bromoethyl)benzene (**2l**) (41.0 μL, 0.3 mmol). The crude product was purified by flash chromatography on silica gel (eluted with Petroleum ether:EtOAc = 5:1) to give the product (62.5 mg, 80% yield) as a colorless oil. *R<sub>f</sub>* = 0.61 (Petroleum ether:EtOAc = 2:1). <sup>1</sup>H NMR (400 MHz, CDCl<sub>3</sub>) δ: 7.29 – 7.25 (m, 2H), 7.19 – 7.17 (m, 3H), 2.91 – 2.87 (m, 2H), 2.79 – 2.77 (m, 4H), 2.09 – 2.05 (m, 1H), 1.96 – 1.94 (m, 1H), 1.81 – 1.79 (m, 2H), 1.58 – 1.56 (m, 1H), 1.38 – 1.36 (m, 3H) ppm. <sup>13</sup>C{<sup>1</sup>H} NMR (101 MHz, CDCl<sub>3</sub>) δ: 210.8, 180.1, 141.3, 128.4, 128.3, 126.0, 49.4, 42.3, 41.8, 29.6, 25.9, 23.9, 23.5 ppm. One resonance was not observed due to overlapping resonances. IR(neat): 3385, 2964, 2843, 1727, 1684, 1495, 1423, 1313, 1200, 1092, 986, 916, 860, 743, 603, 552, 493, 420. HRMS: calcd for C<sub>16</sub>H<sub>21</sub>O<sub>3</sub> [M+H]<sup>+</sup> 261.1491, found 261.1489.

**Cis-2-(3-(2,3-dihydrobenzofuran-6-yl)propanoyl)cyclohexane-1-carboxylic acid (3am).** The

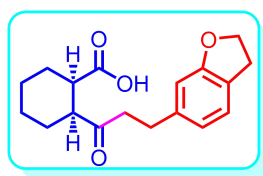

reaction was performed following the General Procedure A with Ni(COD)<sub>2</sub> (8.3 mg, 0.03 mmol), bipy (7.0 mg, 0.045 mmol), **1a** (69.4 mg, 0.45 mmol), Zn powder (39.2 mg, 0.6 mmol), and 6-(2-bromoethyl)-2,3-dihydrobenzofuran (**2m**) (68.1 mg, 0.3 mmol). The crude product was purified by flash chromatography on silica gel (eluted with Petroleum ether:EtOAc = 5:1) to give the product (73.5 mg, 81% yield) as a colorless oil. *R<sub>f</sub>* = 0.48 (Petroleum ether:EtOAc = 2:1). <sup>1</sup>H NMR (400 MHz, CDCl<sub>3</sub>) δ: 7.01 (s, 1H), 6.90 (d, *J* = 8.1 Hz, 1H), 6.68 (d, *J* = 8.1 Hz, 1H), 4.53 (t, *J* = 8.6 Hz, 2H), 3.16 (t, *J* = 8.7 Hz, 2H), 2.85 – 2.76 (m, 6H), 2.09 – 2.04 (m, 1H), 1.96 – 1.95 (m, 1H), 1.81 – 1.70 (m, 2H), 1.57 – 1.56 (m, 1H), 1.38 – 1.25 (m, 3H) ppm. <sup>13</sup>C{<sup>1</sup>H} NMR (101 MHz, CDCl<sub>3</sub>) δ: 210.9, 180.1, 158.3, 133.2, 128.3, 127.6, 127.0, 124.9, 109.0, 71.1, 49.4, 42.3, 34.3, 29.7, 29.0, 25.9, 23.9, 23.5 ppm. IR(neat): 3689, 2935, 2857, 1724, 1680, 1540, 1492, 1361, 1243, 1197, 1028, 982, 942, 886, 814, 736, 419. HRMS: calcd for C<sub>18</sub>H<sub>23</sub>O<sub>4</sub> [M+H]<sup>+</sup> 303.1596, found 303.1598.

**Cis-2-(3-(4-(methoxycarbonyl)phenyl)propanoyl)cyclohexane-1-carboxylic acid (3an).** The

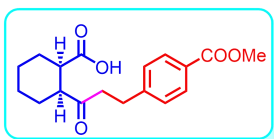

reaction was performed following the General Procedure A with Ni(COD)<sub>2</sub> (8.3 mg, 0.03 mmol), bipy (7.0 mg, 0.045 mmol), **1a** (69.4 mg, 0.45 mmol), Zn powder (39.2 mg, 0.6 mmol), and methyl 4-(2-bromoethyl)benzoate (**2n**) (72.9 mg, 0.3 mmol). The crude product was purified by flash chromatography on silica gel (eluted with Petroleum ether:EtOAc = 5:1) to give the product (59.2 mg, 62% yield) as a colorless oil. *R<sub>f</sub>* = 0.42 (Petroleum ether:EtOAc = 2:1). <sup>1</sup>H NMR (400 MHz, CDCl<sub>3</sub>) δ: 7.94 (d, *J* = 8.2 Hz, 2H), 7.23 (d, *J* = 8.1 Hz, 2H), 3.90 (s, 3H), 2.76 – 2.70 (m, 1H), 2.68 – 2.59 (m, 2H), 1.87 – 1.84 (m, 1H), 1.80 – 1.50 (m, 8H), 1.39 – 1.37 (m, 2H) ppm. <sup>13</sup>C{<sup>1</sup>H} NMR (101 MHz, CDCl<sub>3</sub>) δ: 210.3, 179.8, 167.1, 146.9, 129.7, 128.4, 127.9, 52.0, 49.3, 42.4, 41.2, 29.5, 25.9, 23.9, 23.4 ppm. One resonance was not observed due to overlapping resonances. IR(neat): 3726, 2935, 2858, 1723, 1717, 1712, 1683, 1607, 1541, 1436, 1281, 1180, 994, 766, 636, 508, 447, 426. HRMS: calcd for C<sub>18</sub>H<sub>23</sub>O<sub>5</sub> [M+H]<sup>+</sup> 319.1545, found 319.1548.

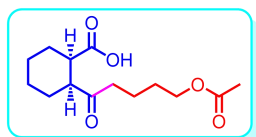

**Cis-2-(5-acetoxypentanoyl)cyclohexane-1-carboxylic acid (3ao).** The reaction was performed following the General Procedure A with Ni(COD)<sub>2</sub> (8.3 mg, 0.03 mmol), bipy (7.0 mg, 0.045 mmol), **1a** (69.4 mg, 0.45 mmol), Zn powder (39.2 mg, 0.6 mmol), and 4-bromobutyl acetate (**2o**) (43.4 μL, 0.3 mmol). The crude product was purified by flash chromatography on silica gel (eluted with Petroleum ether:EtOAc = 5:1) to give the product (52.7 mg, 65% yield) as a colorless oil.  $R_f = 0.49$  (Petroleum ether:EtOAc = 2:1). <sup>1</sup>H NMR (400 MHz, CDCl<sub>3</sub>) δ: 4.05 – 4.02 (m, 2H), 2.76 – 2.67 (m, 2H), 2.53 – 2.48 (m, 2H), 2.07 – 2.06 (m, 1H), 2.02 (s, 3H), 1.96 – 1.90 (m, 1H), 1.81 – 1.77 (m, 2H), 1.61 – 1.60 (m, 5H), 1.40 – 1.38 (m, 3H) ppm. <sup>13</sup>C{<sup>1</sup>H} NMR (101 MHz, CDCl<sub>3</sub>) δ: 211.3, 179.8, 171.3, 64.2, 49.1, 42.3, 39.3, 27.9, 26.0, 25.8, 23.9, 23.4, 20.9, 19.9 ppm. IR(neat): 3568, 2940, 2860, 1744, 1727, 1720, 1683, 1451, 1367, 1247, 1039, 902, 808, 736, 608, 514, 441. HRMS: calcd for C<sub>14</sub>H<sub>23</sub>O<sub>5</sub> [M+H]<sup>+</sup> 271.1545, found 271.1543.

**Cis-2-(7-(1,3-dioxisoindolin-2-yl)heptanoyl)cyclohexane-1-carboxylic acid (3ap).** The reaction was performed following the General Procedure A with Ni(COD)<sub>2</sub> (8.3 mg, 0.03 mmol), bipy (7.0 mg, 0.045 mmol), **1a** (69.4 mg, 0.45 mmol), Zn powder (39.2 mg, 0.6 mmol), and *N*-(6-bromohexyl)phthalimide (**2p**) (93.1 mg, 0.3 mmol). The crude product was purified by flash chromatography on silica gel (eluted with Petroleum ether:EtOAc = 5:1) to give the product (75.2 mg, 65% yield) as a colorless oil.  $R_f = 0.45$  (Petroleum ether:EtOAc = 2:1). <sup>1</sup>H NMR (400 MHz, CDCl<sub>3</sub>) δ: 7.83 – 7.80 (m, 2H), 7.70 – 7.68 (m, 2H), 3.66 – 3.63 (m, 2H), 2.75 – 2.65 (m, 2H), 2.49 – 2.41 (m, 2H), 2.03 – 1.96 (m, 2H), 1.78 – 1.75 (m, 2H), 1.68 – 1.62 (m, 2H), 1.54 – 1.51 (m, 3H), 1.38 – 1.35 (m, 3H), 1.31 – 1.29 (m, 4H) ppm. <sup>13</sup>C{<sup>1</sup>H} NMR (101 MHz, CDCl<sub>3</sub>) δ: 211.7, 179.7, 168.4, 133.8, 132.0, 123.1, 49.2, 42.2, 39.8, 37.8, 28.6, 28.3, 26.5, 26.1, 25.7, 23.9, 23.4, 23.3 ppm. IR(neat): 3654, 3165, 2064, 1767, 1726, 1684, 1667, 1652, 1635, 1616, 1435, 1386, 1185, 1043, 792, 622, 529, 464, 433, 414. HRMS: calcd for C<sub>22</sub>H<sub>28</sub>NO<sub>5</sub> [M+H]<sup>+</sup> 386.1967, found 386.1972.

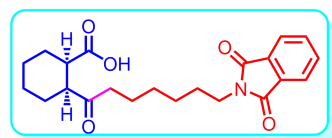

**Cis-2-(7-(benzyloxy)heptanoyl)cyclohexane-1-carboxylic acid (3aq).** The reaction was performed following the General Procedure A with Ni(COD)<sub>2</sub> (8.3 mg, 0.03 mmol), bipy (7.0 mg, 0.045 mmol), **1a** (69.4 mg, 0.45 mmol), Zn powder (39.2 mg, 0.6 mmol), and 6-benzyloxyhexyl bromide (**2q**) (81.4 mg, 0.3 mmol). The crude product was purified by flash chromatography on silica gel (eluted with Petroleum ether:EtOAc = 5:1) to give the product (85.3 mg, 82% yield) as a colorless oil.  $R_f = 0.45$  (Petroleum ether:EtOAc = 2:1). <sup>1</sup>H NMR (400 MHz, CDCl<sub>3</sub>) δ: 7.36 – 7.33 (m, 4H), 7.29 – 7.26 (m, 1H), 4.50 (s, 2H), 3.46 (t,  $J = 6.6$  Hz, 2H), 2.79 – 2.74 (m, 2H), 2.50 – 2.43 (m, 2H), 2.05 – 1.99 (m, 2H), 1.80 – 1.79 (m, 2H), 1.62 – 1.54 (m, 5H), 1.40 – 1.34 (m, 5H), 1.31 – 1.26 (m, 2H) ppm. <sup>13</sup>C{<sup>1</sup>H} NMR (101 MHz, CDCl<sub>3</sub>) δ: 211.8, 180.0, 138.5, 128.3, 127.6, 127.4, 72.7, 70.3, 49.2, 42.3, 40.0, 29.5, 28.9, 26.1, 25.9, 25.8, 25.7, 23.9, 23.4 ppm. IR(neat): 3632, 2939, 2858, 1725, 1687, 1555, 1453, 1408, 1362, 1256, 1187, 1098, 992, 735, 698, 610, 548, 491, 441, 410. HRMS: calcd for C<sub>21</sub>H<sub>31</sub>O<sub>4</sub> [M+H]<sup>+</sup> 347.2222, found 347.2222.

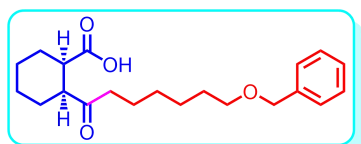

**Cis-2-(7-ethoxy-7-oxoheptanoyl)cyclohexane-1-carboxylic acid (3ar).** The reaction was performed following the General Procedure A with Ni(COD)<sub>2</sub> (8.3 mg, 0.03 mmol), bipy (7.0 mg, 0.045 mmol), **1a** (69.4 mg, 0.45 mmol), Zn powder (39.2 mg, 0.6 mmol), and ethyl 6-bromohexanoate (**2r**) (53.4 μL, 0.3 mmol). The crude product was purified by flash chromatography on silica gel (eluted

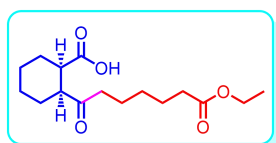

with Petroleum ether:EtOAc = 5:1) to give the product (68.0 mg, 76% yield) as a colorless oil.  $R_f$  = 0.60 (Petroleum ether:EtOAc = 2:1).  $^1\text{H}$  NMR (400 MHz,  $\text{CDCl}_3$ )  $\delta$ : 4.10 (t,  $J$  = 7.1 Hz, 2H), 2.76 – 2.75 (m, 2H), 2.44 – 2.43 (m, 2H), 2.27 (t,  $J$  = 7.5 Hz, 2H), 2.06 – 1.96 (m, 2H), 1.79 – 1.76 (m, 2H), 1.63 – 1.52 (m, 5H), 1.39 – 1.38 (m, 3H), 1.32 – 1.27 (m, 2H), 1.23 (t,  $J$  = 7.1 Hz, 3H) ppm.  $^{13}\text{C}\{^1\text{H}\}$  NMR (101 MHz,  $\text{CDCl}_3$ )  $\delta$ : 211.7, 179.7, 173.8, 60.2, 49.2, 42.3, 39.7, 34.1, 28.6, 26.0, 25.7, 24.7, 23.9, 23.4, 23.1, 14.2 ppm. IR(neat): 3627, 3193, 2983, 1726, 1684, 1671, 1651, 1636, 1450, 1373, 1162, 672, 629, 498, 456, 448, 429, 421, 410. HRMS: calcd for  $\text{C}_{16}\text{H}_{27}\text{O}_5$   $[\text{M}+\text{H}]^+$  299.1858, found 299.1856.

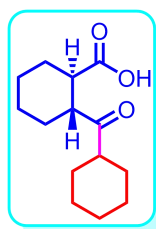

**Trans-2-(cyclohexanecarbonyl)cyclohexane-1-carboxylic acid (3ba).** The reaction was performed following the General Procedure A with  $\text{Ni}(\text{COD})_2$  (8.3 mg, 0.03 mmol), bipy (7.0 mg, 0.045 mmol), **1b** (69.4 mg, 0.45 mmol), Zn powder (39.2 mg, 0.6 mmol), and bromocyclohexane (**2a**) (36.9  $\mu\text{L}$ , 0.3 mmol). The crude product was purified by flash chromatography on silica gel (eluted with Petroleum ether:EtOAc = 5:1) to give the product (58.6 mg, 82% yield) as a white solid. Mp 32.0 – 32.4  $^\circ\text{C}$ .  $R_f$  = 0.71 (Petroleum ether:EtOAc = 2:1).  $^1\text{H}$  NMR (400 MHz,  $\text{CDCl}_3$ )  $\delta$ : 3.13 – 3.02 (m, 1H), 2.65 – 2.56 (m, 2H), 2.09 – 2.03 (m, 2H), 1.81 – 1.74 (m, 5H), 1.72 – 1.65 (m, 3H), 1.43 – 1.22 (m, 8H) ppm.  $^{13}\text{C}\{^1\text{H}\}$  NMR (101 MHz,  $\text{CDCl}_3$ )  $\delta$ : 215.0, 180.3, 47.7, 47.4, 42.4, 29.4, 28.2, 26.3, 25.9, 25.8, 25.5, 25.4, 24.2, 23.3 ppm. IR(neat): 3628, 3270, 2634, 1724, 1685, 1652, 1644, 626, 522, 470, 448, 433, 429, 421, 412. HRMS: calcd for  $\text{C}_{14}\text{H}_{23}\text{O}_3$   $[\text{M}+\text{H}]^+$  239.1647, found 239.1648.

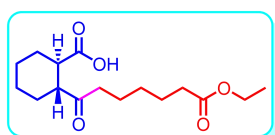

**Trans-2-(7-ethoxy-7-oxoheptanoyl)cyclohexane-1-carboxylic acid (3br).** The reaction was performed following the General Procedure A with  $\text{Ni}(\text{COD})_2$  (8.3 mg, 0.03 mmol), bipy (7.0 mg, 0.045 mmol), **1b** (69.4 mg, 0.45 mmol), Zn powder (39.2 mg, 0.6 mmol), and ethyl 6-bromohexanoate (**2r**) (53.4  $\mu\text{L}$ , 0.3 mmol). The crude product was purified by flash chromatography on silica gel (eluted with Petroleum ether:EtOAc = 5:1) to give the product (71.6 mg, 80% yield) as a colorless oil.  $R_f$  = 0.52 (Petroleum ether:EtOAc = 2:1).  $^1\text{H}$  NMR (400 MHz,  $\text{CDCl}_3$ )  $\delta$ : 4.10 (q,  $J$  = 7.2 Hz, 2H), 2.78 – 2.74 (m, 2H), 2.49 – 2.43 (m, 2H), 2.27 (t,  $J$  = 7.5 Hz, 2H), 2.05 – 1.98 (m, 2H), 1.80 – 1.75 (m, 2H), 1.62 – 1.54 (m, 5H), 1.39 – 1.37 (m, 3H), 1.30 – 1.28 (m, 2H), 1.23 (t,  $J$  = 7.2 Hz, 3H) ppm.  $^{13}\text{C}\{^1\text{H}\}$  NMR (101 MHz,  $\text{CDCl}_3$ )  $\delta$ : 211.7, 179.9, 173.8, 60.2, 49.2, 42.3, 39.7, 34.1, 28.5, 26.1, 25.8, 24.7, 23.9, 23.4, 23.1, 14.2 ppm. IR(neat): 3651, 2941, 2860, 1722, 1716, 1702, 1698, 1688, 1451, 1373, 1185, 896, 857, 737, 704, 579, 514, 478, 426. HRMS: calcd for  $\text{C}_{16}\text{H}_{27}\text{O}_5$   $[\text{M}+\text{H}]^+$  299.1858, found 299.1856.

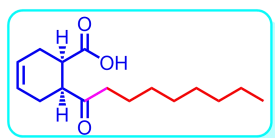

**Cis-6-nonanoylcyclohex-3-ene-1-carboxylic acid (3cg).** The reaction was performed following the General Procedure A with  $\text{Ni}(\text{COD})_2$  (8.3 mg, 0.03 mmol), bipy (7.0 mg, 0.045 mmol), **1c** (68.5 mg, 0.45 mmol), Zn powder (39.2 mg, 0.6 mmol), and 1-bromooctane (**2g**) (51.8  $\mu\text{L}$ , 0.3 mmol). The crude product was purified by flash chromatography on silica gel (eluted with Petroleum ether:EtOAc = 5:1) to give the product (67.9 mg, 85% yield) as a colorless oil.  $R_f$  = 0.64 (Petroleum ether:EtOAc = 2:1).  $^1\text{H}$  NMR (400 MHz,  $\text{CDCl}_3$ )  $\delta$ : 5.71 – 5.64 (m, 2H), 3.04 – 3.00 (m, 1H), 2.93 – 2.91 (m, 1H), 2.63 – 2.58 (m, 1H), 2.49 – 2.45 (m, 3H), 2.38 – 2.32 (m, 1H), 1.57 – 1.53 (m, 2H), 1.30 – 1.25 (m, 11H), 0.87 (t,  $J$  = 6.6 Hz, 3H) ppm.  $^{13}\text{C}\{^1\text{H}\}$  NMR (101 MHz,  $\text{CDCl}_3$ )  $\delta$ : 211.2, 179.5, 125.9, 124.5, 46.4, 39.9, 39.2, 31.8, 29.4, 29.2, 29.1, 25.9, 25.4, 23.6, 22.6, 14.1 ppm. IR(neat): 3675, 2927,

2855, 1728, 1704, 1683, 1454, 1257, 1196, 1011, 933, 878, 812, 757, 723, 620, 524, 430, 419. HRMS: calcd for C<sub>16</sub>H<sub>27</sub>O<sub>3</sub> [M+H]<sup>+</sup> 267.1960, found 267.1957.

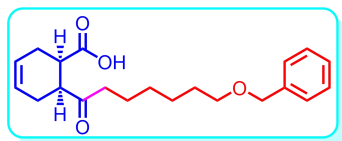

**Cis-6-(7-(benzyloxy)heptanoyl)cyclohex-3-ene-1-carboxylic acid (3cq).**

The reaction was performed following the General Procedure A with Ni(COD)<sub>2</sub> (8.3 mg, 0.03 mmol), bipy (7.0 mg, 0.045 mmol), **1c** (68.5 mg, 0.45 mmol), Zn powder (39.2 mg, 0.6 mmol), and 6-benzyloxyhexyl bromide (**2q**) (81.4 mg, 0.3 mmol). The crude product was purified by flash chromatography on silica gel (eluted with Petroleum ether:EtOAc = 5:1) to give the product (86.8 mg, 84% yield) as a colorless oil. R<sub>f</sub> = 0.54 (Petroleum ether:EtOAc = 2:1). <sup>1</sup>H NMR (400 MHz, CDCl<sub>3</sub>) δ: 7.34 – 7.32 (m, 4H), 7.28 – 7.25 (m, 1H), 5.69 – 5.64 (m, 2H), 4.49 (s, 2H), 3.45 (t, J = 6.6 Hz, 2H), 3.02 – 2.90 (m, 2H), 2.63 – 2.58 (m, 1H), 2.48 – 2.45 (m, 3H), 2.37 – 2.32 (m, 1H), 1.64 – 1.53 (m, 4H), 1.40 – 1.25 (m, 5H) ppm. <sup>13</sup>C{<sup>1</sup>H} NMR (101 MHz, CDCl<sub>3</sub>) δ: 210.9, 179.3, 138.5, 128.3, 127.6, 127.4, 125.8, 124.4, 72.7, 70.2, 46.4, 39.7, 39.2, 29.5, 28.9, 25.92, 25.87, 25.4, 23.4 ppm. IR(neat): 3443, 3031, 2937, 2858, 1723, 1701, 1684, 1655, 1495, 1454, 1437, 1365, 1298, 1200, 1099, 943, 907, 736, 699, 664, 610, 460. HRMS: calcd for C<sub>21</sub>H<sub>29</sub>O<sub>4</sub> [M+H]<sup>+</sup> 345.2066, found 345.2063.

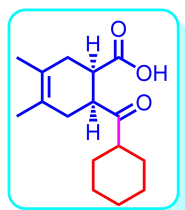

**Cis-6-(cyclohexanecarbonyl)-3,4-dimethylcyclohex-3-ene-1-carboxylic acid (3da).**

The reaction was performed following the General Procedure A with Ni(COD)<sub>2</sub> (8.3 mg, 0.03 mmol), bipy (7.0 mg, 0.045 mmol), **1d** (81.1 mg, 0.45 mmol), Zn powder (39.2 mg, 0.6 mmol), and bromocyclohexane (**2a**) (36.9 μL, 0.3 mmol). The crude product was purified by flash chromatography on silica gel (eluted with Petroleum ether:EtOAc = 5:1) to give the product (61.8 mg, 78% yield) as a white solid. Mp 31.0 – 31.2 °C. R<sub>f</sub> = 0.62 (Petroleum ether:EtOAc = 2:1). <sup>1</sup>H NMR (400 MHz, CDCl<sub>3</sub>) δ: 3.08 – 3.04 (m, 1H), 2.94 – 2.91 (m, 1H), 2.59 – 2.50 (m, 2H), 2.35 – 2.34 (m, 2H), 2.26 – 2.21 (m, 1H), 1.84 – 1.81 (m, 1H), 1.78 – 1.75 (m, 2H), 1.67 – 1.62 (m, 8H), 1.33 – 1.20 (m, 5H) ppm. <sup>13</sup>C{<sup>1</sup>H} NMR (101 MHz, CDCl<sub>3</sub>) δ: 214.5, 179.5, 124.7, 123.1, 47.6, 45.4, 40.0, 31.9, 31.7, 29.2, 28.4, 25.83, 25.81, 25.5, 19.0, 18.8 ppm. IR(neat): 3476, 2906, 2646, 1736, 1722, 1682, 1677, 1432, 1368, 1287, 1052, 983, 893, 784, 752, 686, 571, 453, 412. HRMS: calcd for C<sub>16</sub>H<sub>25</sub>O<sub>3</sub> [M+H]<sup>+</sup> 265.1804, found 265.1799.

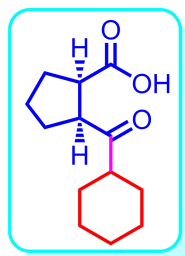

**Cis-2-(cyclohexanecarbonyl)cyclopentane-1-carboxylic acid (3ea).**

The reaction was performed following the General Procedure A with Ni(COD)<sub>2</sub> (8.3 mg, 0.03 mmol), bipy (7.0 mg, 0.045 mmol), **1e** (63.1 mg, 0.45 mmol), Zn powder (39.2 mg, 0.6 mmol), and bromocyclohexane (**2a**) (36.9 μL, 0.3 mmol). The crude product was purified by flash chromatography on silica gel (eluted with Petroleum ether:EtOAc = 5:1) to give the product (48.5 mg, 72% yield) as a white solid. Mp 29.2 – 29.6 °C. R<sub>f</sub> = 0.61 (Petroleum ether:EtOAc = 2:1). <sup>1</sup>H NMR (400 MHz, CDCl<sub>3</sub>) δ: 3.39 – 3.33 (m, 1H), 3.28 – 3.21 (m, 1H), 2.49 – 2.44 (m, 1H), 2.06 – 2.00 (m, 2H), 1.90 – 1.87 (m, 2H), 1.79 – 1.77 (m, 3H), 1.72 – 1.64 (m, 4H), 1.42 – 1.37 (m, 1H), 1.29 – 1.20 (m, 4H) ppm. <sup>13</sup>C{<sup>1</sup>H} NMR (101 MHz, CDCl<sub>3</sub>) δ: 214.7, 181.0, 52.2, 50.3, 45.5, 30.7, 29.9, 28.7, 28.1, 25.8, 25.7, 25.6, 25.5 ppm. IR(neat): 3610, 2929, 2852, 1723, 1701, 1687, 1450, 1379, 1208, 1145, 934, 896, 788, 759, 689, 514, 435. HRMS: calcd for C<sub>13</sub>H<sub>21</sub>O<sub>3</sub> [M+H]<sup>+</sup> 225.1491, found 225.1487.

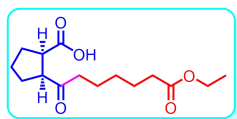

**Cis-2-(7-ethoxy-7-oxoheptanoyl)cyclopentane-1-carboxylic acid (3er).** The reaction was performed following the General Procedure A with Ni(COD)<sub>2</sub> (8.3 mg, 0.03 mmol), bipy (7.0 mg, 0.045 mmol), **1e** (63.1 mg, 0.45 mmol), Zn powder (39.2 mg, 0.6 mmol), and ethyl 6-bromohexanoate (**2r**) (53.4 μL, 0.3 mmol). The crude product was purified by flash chromatography on silica gel (eluted with Petroleum ether:EtOAc = 5:1) to give the product (71.7 mg, 84% yield) as a colorless oil.  $R_f = 0.58$  (Petroleum ether:EtOAc = 2:1). <sup>1</sup>H NMR (400 MHz, CDCl<sub>3</sub>) δ: 4.11 (q,  $J = 7.1$  Hz, 2H), 3.25 – 3.18 (m, 2H), 2.52 – 2.48 (m, 2H), 2.28 (t,  $J = 7.5$  Hz, 2H), 2.06 – 2.00 (m, 2H), 1.91 – 1.86 (m, 1H), 1.72 – 1.60 (m, 7H), 1.34 – 1.29 (m, 2H), 1.24 (t,  $J = 7.1$  Hz, 3H) ppm. <sup>13</sup>C{<sup>1</sup>H} NMR (101 MHz, CDCl<sub>3</sub>) δ: 211.3, 180.4, 173.8, 60.3, 54.0, 45.2, 41.8, 34.1, 30.2, 29.9, 28.6, 25.5, 24.7, 23.2, 14.2 ppm. IR(neat): 3654, 3138, 2064, 1722, 1716, 1683, 1667, 1613, 1452, 1373, 1189, 795, 525, 487, 476, 448, 426, 418. HRMS: calcd for C<sub>15</sub>H<sub>25</sub>O<sub>5</sub> [M+H]<sup>+</sup> 285.1702, found 285.1701.

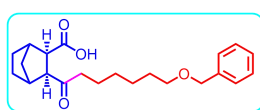

**Cis-3-(7-(benzyloxy)heptanoyl)bicyclo[2.2.1]heptane-2-carboxylic acid (3fq).** The reaction was performed following the General Procedure A with Ni(COD)<sub>2</sub> (8.3 mg, 0.03 mmol), bipy (7.0 mg, 0.045 mmol), **1f** (74.8 mg, 0.45 mmol), Zn powder (39.2 mg, 0.6 mmol), and 6-benzyloxyhexyl bromide (**2q**) (81.4 mg, 0.3 mmol). The crude product was purified by flash chromatography on silica gel (eluted with Petroleum ether:EtOAc = 5:1) to give the product (97.9 mg, 91% yield) as a colorless oil.  $R_f = 0.71$  (Petroleum ether:EtOAc = 2:1). <sup>1</sup>H NMR (400 MHz, CDCl<sub>3</sub>) δ: 7.36 – 7.33 (m, 4H), 7.30 – 7.26 (m, 1H), 4.50 (s, 2H), 3.46 (t,  $J = 6.6$  Hz, 2H), 3.37 – 3.35 (m, 1H), 2.85 – 2.84 (m, 1H), 2.66 – 2.64 (m, 1H), 2.56 – 2.50 (m, 1H), 2.47 – 2.40 (m, 2H), 1.64 – 1.56 (m, 5H), 1.43 – 1.35 (m, 6H), 1.30 – 1.26 (m, 2H), 1.22 – 1.20 (m, 1H) ppm. <sup>13</sup>C{<sup>1</sup>H} NMR (101 MHz, CDCl<sub>3</sub>) δ: 210.4, 179.4, 138.5, 128.3, 127.6, 127.4, 72.8, 70.2, 55.7, 47.0, 41.6, 41.2, 39.8, 37.3, 29.5, 29.4, 29.0, 25.9, 24.4, 23.8 ppm. IR(neat): 3655, 3130, 2065, 1720, 1682, 1608, 1496, 1453, 1362, 1260, 1233, 1181, 814, 748, 697, 548, 510, 491, 461, 425, 412. HRMS: calcd for C<sub>22</sub>H<sub>31</sub>O<sub>4</sub> [M+H]<sup>+</sup> 359.2222, found 359.2224.

**Cis-3-(7-ethoxy-7-oxoheptanoyl)bicyclo[2.2.1]heptane-2-carboxylic acid (3fr).** The reaction was performed following the General Procedure A with Ni(COD)<sub>2</sub> (8.3 mg, 0.03 mmol), bipy (7.0 mg, 0.045 mmol), **1f** (74.8 mg, 0.45 mmol), Zn powder (39.2 mg, 0.6 mmol), and ethyl 6-bromohexanoate (**2r**) (53.4 μL, 0.3 mmol). The crude product was purified by flash chromatography on silica gel (eluted with Petroleum ether:EtOAc = 5:1) to give the product (86.6 mg, 93% yield) as a colorless oil.  $R_f = 0.57$  (Petroleum ether:EtOAc = 2:1). <sup>1</sup>H NMR (400 MHz, CDCl<sub>3</sub>) δ: 4.11 (q,  $J = 7.1$  Hz, 2H), 3.37 – 3.34 (m, 1H), 2.84 – 2.83 (m, 1H), 2.67 – 2.65 (m, 1H), 2.57 – 2.53 (m, 1H), 2.47 – 2.42 (m, 2H), 2.28 (t,  $J = 7.5$  Hz, 2H), 1.64 – 1.56 (m, 5H), 1.49 – 1.45 (m, 1H), 1.43 – 1.36 (m, 3H), 1.36 – 1.30 (m, 2H), 1.24 (t,  $J = 7.2$  Hz, 3H), 1.21 – 1.20 (m, 1H) ppm. <sup>13</sup>C{<sup>1</sup>H} NMR (101 MHz, CDCl<sub>3</sub>) δ: 210.2, 179.3, 173.7, 60.3, 55.7, 47.0, 41.5, 41.3, 39.8, 37.3, 34.1, 29.4, 28.6, 24.7, 24.5, 23.5, 14.2 ppm. IR(neat): 3655, 3130, 2827, 1723, 1715, 1682, 1652, 1608, 1260, 814, 748, 697, 634, 556, 510, 448, 425, 412. HRMS: calcd for C<sub>17</sub>H<sub>27</sub>O<sub>5</sub> [M+H]<sup>+</sup> 311.1858, found 311.1860.

**Cis-3-(7-(benzyloxy)heptanoyl)bicyclo[2.2.1]hept-5-ene-2-carboxylic acid (3gq).** The reaction was performed following the General Procedure A with Ni(COD)<sub>2</sub> (8.3 mg, 0.03 mmol), bipy (7.0 mg, 0.045 mmol), **1g** (73.9 mg, 0.45 mmol), Zn powder (39.2 mg, 0.6 mmol), and 6-benzyloxyhexyl bromide (**2q**) (81.4 mg, 0.3 mmol). The crude product was purified by flash chromatography

on silica gel (eluted with Petroleum ether:EtOAc = 5:1) to give the product (77.0 mg, 72% yield) as a colorless oil.  $R_f$  = 0.49 (Petroleum ether:EtOAc = 2:1).  $^1\text{H}$  NMR (400 MHz,  $\text{CDCl}_3$ )  $\delta$ : 7.35 – 7.33 (m, 4H), 7.30 – 7.26 (m, 1H), 6.31 – 6.29 (m, 1H), 6.17 – 6.15 (m, 1H), 4.50 (s, 2H), 3.48 – 3.45 (m, 3H), 3.26 – 3.25 (m, 1H), 2.99 – 2.98 (m, 1H), 2.77 – 2.76 (m, 1H), 2.64 – 2.47 (m, 2H), 1.63 – 1.57 (m, 4H), 1.53 – 1.51 (m, 1H), 1.40 – 1.26 (m, 5H) ppm.  $^{13}\text{C}\{^1\text{H}\}$  NMR (101 MHz,  $\text{CDCl}_3$ )  $\delta$ : 210.5, 179.1, 138.5, 137.6, 135.7, 128.3, 127.6, 127.5, 72.8, 70.3, 54.4, 46.9, 46.6, 46.4, 45.2, 42.3, 29.5, 29.0, 26.0, 23.8 ppm. IR(neat): 3646, 3184, 1723, 1680, 1660, 1651, 1496, 1453, 1362, 1332, 1265, 1204, 1074, 737, 698, 610, 522, 472, 441, 410. HRMS: calcd for  $\text{C}_{22}\text{H}_{29}\text{O}_4$   $[\text{M}+\text{H}]^+$  357.2066, found 357.2068.

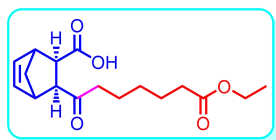

**Cis-3-(7-ethoxy-7-oxoheptanoyl)bicyclo[2.2.1]hept-5-ene-2-carboxylic acid (3gr).** The reaction was performed following the General Procedure A with  $\text{Ni}(\text{COD})_2$  (8.3 mg, 0.03 mmol), bipy (7.0 mg, 0.045 mmol), **1g** (73.9 mg, 0.45 mmol), Zn powder (39.2 mg, 0.6 mmol), and ethyl

6-bromohexanoate (**2r**) (53.4  $\mu\text{L}$ , 0.3 mmol). The crude product was purified by flash chromatography on silica gel (eluted with Petroleum ether:EtOAc = 5:1) to give the product (70.3 mg, 76% yield) as a colorless oil.  $R_f$  = 0.48 (Petroleum ether:EtOAc = 2:1).  $^1\text{H}$  NMR (400 MHz,  $\text{CDCl}_3$ )  $\delta$ : 6.29 – 6.28 (m, 1H), 6.17 – 6.15 (m, 1H), 4.12 (q,  $J$  = 7.1 Hz, 2H), 3.45 – 3.43 (m, 1H), 3.30 – 3.25 (m, 1H), 2.99 – 2.98 (m, 1H), 2.76 – 2.75 (m, 1H), 2.63 – 2.48 (m, 2H), 2.29 (t,  $J$  = 7.5 Hz, 2H), 1.65 – 1.57 (m, 3H), 1.52 – 1.50 (m, 1H), 1.40 – 1.38 (m, 1H), 1.36 – 1.30 (m, 2H), 1.25 (t,  $J$  = 7.1 Hz, 3H), 1.23 – 1.19 (m, 1H) ppm.  $^{13}\text{C}\{^1\text{H}\}$  NMR (101 MHz,  $\text{CDCl}_3$ )  $\delta$ : 210.3, 179.3, 173.7, 137.6, 135.7, 60.3, 54.4, 46.9, 46.5, 46.4, 45.2, 42.1, 34.1, 28.6, 24.6, 23.4, 14.2 ppm. IR(neat): 3734, 2978, 2871, 1732, 1725, 1716, 1683, 1634, 1540, 1454, 1373, 1185, 1033, 948, 866, 744, 558, 499, 410. HRMS: calcd for  $\text{C}_{17}\text{H}_{25}\text{O}_5$   $[\text{M}+\text{H}]^+$  309.1702, found 309.1704.

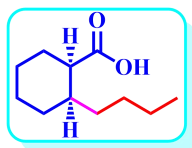

**Cis-2-butylcyclohexane-1-carboxylic acid (4aa).** The reaction was performed following the General Procedure B with  $\text{NiCl}_2\cdot(\text{PPh}_3)_2$  (39.3 mg, 0.06 mmol), **L5** (32.6 mg, 0.09 mmol), **1a** (46.2 mg, 0.3 mmol), Zn powder (39.2 mg, 0.6 mmol), and 1-bromobutane (**2e**) (82.8 mg, 0.6 mmol). The crude product was purified by flash chromatography on silica gel (eluted with Petroleum ether:EtOAc = 5:1) to give the product (44.8 mg, 81% yield) as a colorless oil.  $R_f$  = 0.82 (Petroleum ether:EtOAc = 2:1).  $^1\text{H}$  NMR (400 MHz,  $\text{CDCl}_3$ )  $\delta$ : 2.61 (dt,  $J$  = 8.2, 4.2 Hz, 1H), 1.93 – 1.82 (m, 1H), 1.80 – 1.59 (m, 4H), 1.58 – 1.49 (m, 1H), 1.48 – 1.40 (m, 2H), 1.38 – 1.21 (m, 7H), 0.88 (t,  $J$  = 6.9 Hz, 3H) ppm.  $^{13}\text{C}\{^1\text{H}\}$  NMR (101 MHz,  $\text{CDCl}_3$ )  $\delta$ : 181.4, 45.3, 37.0, 29.8, 29.6, 28.1, 25.3, 23.9, 22.8, 22.5, 14.1 ppm. IR(neat): 3627, 2923, 2876, 1706, 1688, 1523, 1387, 1210, 1110, 927, 899, 743, 710, 692, 520, 444. HRMS: calcd for  $\text{C}_{11}\text{H}_{21}\text{O}_2$   $[\text{M}+\text{H}]^+$  185.1542, found 185.1547.

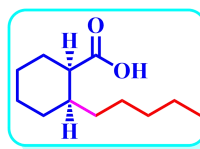

**Cis-2-pentylcyclohexane-1-carboxylic acid (4ab).** The reaction was performed following the General Procedure B with  $\text{NiCl}_2\cdot(\text{PPh}_3)_2$  (39.3 mg, 0.06 mmol), **L5** (32.6 mg, 0.09 mmol), **1a** (46.2 mg, 0.3 mmol), Zn powder (39.2 mg, 0.6 mmol), and 1-bromopentane (**2s**) (90.6 mg, 0.6 mmol). The crude product was purified by flash chromatography on silica gel (eluted with Petroleum ether:EtOAc = 5:1) to give the product (47.6 mg, 80% yield) as a colorless oil.  $R_f$  = 0.83 (Petroleum ether:EtOAc = 2:1).  $^1\text{H}$  NMR (400 MHz,  $\text{CDCl}_3$ )  $\delta$ : 2.54 (dt,  $J$  = 8.2, 4.1 Hz, 1H), 1.84 – 1.74 (m, 1H), 1.72 – 1.53 (m, 4H), 1.49 – 1.41 (m, 1H), 1.40 – 1.31 (m, 2H), 1.30 – 1.14 (m, 9H), 0.80 (t,  $J$  = 6.9 Hz, 3H) ppm.  $^{13}\text{C}\{^1\text{H}\}$  NMR (101 MHz,  $\text{CDCl}_3$ )  $\delta$ : 181.6, 45.3, 37.0, 31.9, 29.8, 28.1, 27.2, 25.3, 23.9, 22.6, 22.5, 14.0 ppm.

IR(neat): 3620, 2933, 2850, 1704, 1690, 1577, 1397, 1253, 1189, 932, 865, 740, 692, 567, 421. HRMS: calcd for C<sub>12</sub>H<sub>23</sub>O<sub>2</sub> [M+H]<sup>+</sup> 199.1698, found 199.1703.

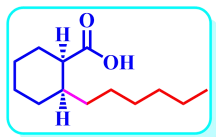

**Cis-2-hexylcyclohexane-1-carboxylic acid (4ac).** The reaction was performed following the General Procedure B with NiCl<sub>2</sub>·(PPh<sub>3</sub>)<sub>2</sub> (39.3 mg, 0.06 mmol), L5 (32.6 mg, 0.09 mmol), **1a** (46.2 mg, 0.3 mmol), Zn powder (39.2 mg, 0.6 mmol), and 1-bromohexane (**2f**) (99 mg, 0.6 mmol). The crude product was purified by flash chromatography on silica gel (eluted with Petroleum ether:EtOAc = 5:1) to give the product (52.9 mg, 83% yield) as a colorless oil. R<sub>f</sub> = 0.87 (Petroleum ether:EtOAc = 2:1). <sup>1</sup>H NMR (400 MHz, CDCl<sub>3</sub>) δ: 2.61 (dt, *J* = 8.3, 4.3 Hz, 1H), 1.90 – 1.81 (m, 1H), 1.79 – 1.59 (m, 4H), 1.52 (q, *J* = 5.1 Hz, 1H), 1.47 – 1.38 (m, 2H), 1.36 – 1.21 (m, 11H), 0.88 (t, *J* = 6.7 Hz, 3H) ppm. <sup>13</sup>C{<sup>1</sup>H} NMR (101 MHz, CDCl<sub>3</sub>) δ: 181.4, 45.3, 37.1, 31.8, 29.9, 29.4, 28.1, 27.5, 25.3, 23.9, 22.6, 22.5, 14.1 ppm. IR(neat): 3673, 2935, 2857, 1706, 1682, 1453, 1266, 1120, 935, 843, 749, 642, 553, 445. HRMS: calcd for C<sub>13</sub>H<sub>25</sub>O<sub>2</sub> [M+H]<sup>+</sup> 213.1855, found 213.1853.

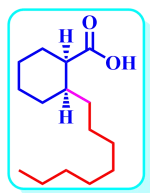

**Cis-2-octylcyclohexane-1-carboxylic acid (4ad).** The reaction was performed following the General Procedure B with NiCl<sub>2</sub>·(PPh<sub>3</sub>)<sub>2</sub> (39.3 mg, 0.06 mmol), L5 (32.6 mg, 0.09 mmol), **1a** (46.2 mg, 0.3 mmol), Zn powder (39.2 mg, 0.6 mmol), and 1-bromooctane (**2g**) (115.9 mg, 0.6 mmol). The crude product was purified by flash chromatography on silica gel (eluted with Petroleum ether:EtOAc = 5:1) to give the product (62 mg, 86% yield) as a colorless oil. R<sub>f</sub> = 0.86 (Petroleum ether:EtOAc = 2:1). <sup>1</sup>H NMR (400 MHz, CDCl<sub>3</sub>) δ: 2.61 (dt, *J* = 8.1, 4.2 Hz, 1H), 1.85 (q, *J* = 8.8, 8.0 Hz, 1H), 1.79 – 1.60 (m, 4H), 1.57 – 1.48 (m, 1H), 1.47 – 1.38 (m, 2H), 1.26 (s, 15H), 0.88 (t, *J* = 6.8 Hz, 3H) ppm. <sup>13</sup>C{<sup>1</sup>H} NMR (101 MHz, CDCl<sub>3</sub>) δ: 181.5, 45.3, 37.0, 31.9, 29.9, 29.8, 29.6, 29.3, 28.1, 27.5, 25.3, 23.8, 22.7, 22.5, 14.1 ppm. IR(neat): 3653, 2920, 2854, 1707, 1690, 1422, 1250, 1167, 935, 878, 723, 628, 521, 435. HRMS: calcd for C<sub>15</sub>H<sub>29</sub>O<sub>2</sub> [M+H]<sup>+</sup> 241.2168, found 241.2173.

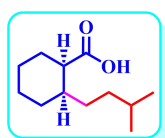

**Cis-2-isopentylcyclohexane-1-carboxylic acid (4ae).** The reaction was performed following the General Procedure B with NiCl<sub>2</sub>·(PPh<sub>3</sub>)<sub>2</sub> (39.3 mg, 0.06 mmol), L5 (32.6 mg, 0.09 mmol), **1a** (46.2 mg, 0.3 mmol), Zn powder (39.2 mg, 0.6 mmol), and 1-bromo-3-methylbutane (**2t**) (90.6 mg, 0.6 mmol). The crude product was purified by flash chromatography on silica gel (eluted with Petroleum ether:EtOAc = 5:1) to give the product (41.1 mg, 69% yield) as a colorless oil. R<sub>f</sub> = 0.85 (Petroleum ether:EtOAc = 2:1). <sup>1</sup>H NMR (400 MHz, CDCl<sub>3</sub>) δ: 2.62 (dt, *J* = 8.2, 4.2 Hz, 1H), 1.80 (s, 1H), 1.79 – 1.62 (m, 4H), 1.56 – 1.43 (m, 3H), 1.41 – 1.30 (m, 3H), 1.26 – 1.10 (m, 3H), 0.87 (d, *J* = 2.1 Hz, 3H), 0.85 (d, *J* = 2.1 Hz, 3H) ppm. <sup>13</sup>C{<sup>1</sup>H} NMR (101 MHz, CDCl<sub>3</sub>) δ: 180.8, 45.2, 37.3, 36.8, 28.1, 28.1, 27.6, 25.3, 23.8, 22.8, 22.5, 22.4 ppm. IR(neat): 3643, 2927, 2856, 1706, 1688, 1372, 1266, 1178, 945, 864, 746, 630, 527, 422. HRMS: calcd for C<sub>12</sub>H<sub>23</sub>O<sub>2</sub> [M+H]<sup>+</sup> 199.1698, found 199.1697.

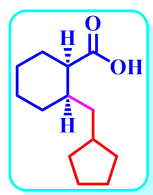

**Cis-2-(cyclopentylmethyl)cyclohexane-1-carboxylic acid (4af).** The reaction was performed following the General Procedure B with NiCl<sub>2</sub>·(PPh<sub>3</sub>)<sub>2</sub> (39.3 mg, 0.06 mmol), L5 (32.6 mg, 0.09 mmol), **1a** (46.2 mg, 0.3 mmol), Zn powder (39.2 mg, 0.6 mmol), and cyclohexylmethyl bromide (**2u**) (97.8 mg, 0.6 mmol). The crude product was purified by flash chromatography on silica gel (eluted with Petroleum ether:EtOAc = 5:1) to give the product (51.1 mg, 81% yield) as a colorless oil. R<sub>f</sub> =

0.86 (Petroleum ether:EtOAc = 2:1).  $^1\text{H}$  NMR (400 MHz,  $\text{CDCl}_3$ )  $\delta$ : 2.59 (dt,  $J = 8.1, 4.2$  Hz, 1H), 1.96 – 1.88 (m, 1H), 1.85 – 1.65 (m, 6H), 1.64 – 1.46 (m, 7H), 1.42 (dd,  $J = 8.8, 4.1$  Hz, 1H), 1.37 – 1.25 (m, 2H), 1.16 (td,  $J = 8.6, 4.3$  Hz, 1H), 1.08 – 0.99 (m, 2H) ppm.  $^{13}\text{C}\{^1\text{H}\}$  NMR (101 MHz,  $\text{CDCl}_3$ )  $\delta$ : 180.8, 45.3, 37.5, 36.2, 35.9, 33.2, 32.1, 28.2, 25.3, 25.0, 24.9, 23.9, 22.8 ppm. IR(neat): 3423, 2925, 2851, 2092, 1688, 1637, 1448, 1247, 1212, 570. HRMS: calcd for  $\text{C}_{13}\text{H}_{23}\text{O}_2$   $[\text{M}+\text{H}]^+$  211.1698, found 211.1693.

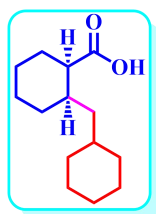

**Cis-2-(cyclohexylmethyl)cyclohexane-1-carboxylic acid (4ag).** The reaction was performed following the General Procedure B with  $\text{NiCl}_2\cdot(\text{PPh}_3)_2$  (39.3 mg, 0.06 mmol), L5 (32.6 mg, 0.09 mmol), **1a** (46.2 mg, 0.3 mmol), Zn powder (39.2 mg, 0.6 mmol), and cyclohexylmethyl bromide (**2i**) (106.2 mg, 0.6 mmol). The crude product was purified by flash chromatography on silica gel (eluted with Petroleum ether:EtOAc = 5:1) to give the product (59.2 mg, 88% yield) as a colorless oil.  $R_f = 0.85$  (Petroleum ether:EtOAc = 2:1).  $^1\text{H}$  NMR (400 MHz,  $\text{CDCl}_3$ )  $\delta$ : 2.58 (dt,  $J = 8.2, 4.3$  Hz, 1H), 2.04 – 1.90 (m, 1H), 1.69 (dt,  $J = 23.2, 8.2$  Hz, 9H), 1.56 – 1.44 (m, 2H), 1.39 – 1.25 (m, 4H), 1.25 – 1.12 (m, 3H), 1.11 – 1.05 (m, 1H), 1.03 – 0.72 (m, 2H) ppm.  $^{13}\text{C}\{^1\text{H}\}$  NMR (101 MHz,  $\text{CDCl}_3$ )  $\delta$ : 181.2, 45.4, 37.5, 34.8, 34.3, 33.7, 32.7, 28.4, 26.8, 26.5, 26.3, 25.2, 23.9, 22.5 ppm. IR(neat): 3628, 2928, 2824, 1702, 1688, 1552, 1370, 1223, 1130, 974, 892, 798, 673, 515, 472. HRMS: calcd for  $\text{C}_{14}\text{H}_{25}\text{O}_2$   $[\text{M}+\text{H}]^+$  225.1855, found 225.1858.

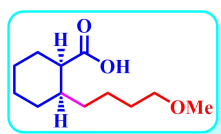

**Cis-2-(4-methoxybutyl)cyclohexane-1-carboxylic acid (4ah).** The reaction was performed following the General Procedure B with  $\text{NiCl}_2\cdot(\text{PPh}_3)_2$  (39.3 mg, 0.06 mmol), L5 (32.6 mg, 0.09 mmol), **1a** (46.2 mg, 0.3 mmol), Zn powder (39.2 mg, 0.6 mmol), and 1-bromo-4-methoxybutane (**2v**) (100.2 mg, 0.6 mmol). The crude product was purified by flash chromatography on silica gel (eluted with Petroleum ether:EtOAc = 5:1) to give the product (34.1 mg, 53% yield) as a colorless oil.  $R_f = 0.43$  (Petroleum ether:EtOAc = 2:1).  $^1\text{H}$  NMR (400 MHz,  $\text{CDCl}_3$ )  $\delta$ : 3.37 (t,  $J = 6.5$  Hz, 2H), 3.33 (s, 3H), 2.63 (d,  $J = 6.6$  Hz, 1H), 1.88 (d,  $J = 15.0$  Hz, 1H), 1.82 – 1.63 (m, 4H), 1.61 – 1.52 (m, 3H), 1.49 – 1.40 (m, 3H), 1.37 – 1.26 (m, 4H) ppm.  $^{13}\text{C}\{^1\text{H}\}$  NMR (101 MHz,  $\text{CDCl}_3$ )  $\delta$ : 185.1, 72.8, 58.5, 37.1, 29.8, 29.7, 28.0, 25.6, 25.5, 24.1, 23.8, 22.6 ppm. IR(neat): 3630, 3180, 1703, 1685, 1662, 1499, 1432, 1302, 1267, 1154, 1074, 757, 610, 536, 477, 418. HRMS: calcd for  $\text{C}_{12}\text{H}_{23}\text{O}_3$   $[\text{M}+\text{H}]^+$  199.1698, found 199.1703.

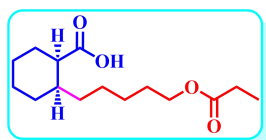

**Cis-2-(5-(propionyloxy)pentyl)cyclohexane-1-carboxylic acid (4ai).** The reaction was performed following the General Procedure B with  $\text{NiCl}_2\cdot(\text{PPh}_3)_2$  (39.3 mg, 0.06 mmol), L5 (32.6 mg, 0.09 mmol), **1a** (46.2 mg, 0.3 mmol), Zn powder (39.2 mg, 0.6 mmol), and 5-bromopentyl propionate (**2w**) (133.7 mg, 0.6 mmol). The crude product was purified by flash chromatography on silica gel (eluted with Petroleum ether:EtOAc = 5:1) to give the product (48.7 mg, 60% yield) as a colorless oil.  $R_f = 0.32$  (Petroleum ether:EtOAc = 2:1).  $^1\text{H}$  NMR (400 MHz,  $\text{CDCl}_3$ )  $\delta$ : 4.08 – 4.03 (m, 2H), 2.55 – 2.43 (m, 1H), 2.23 – 2.19 (m, 2H), 1.78 – 1.74 (m, 1H), 1.66 – 1.49 (m, 7H), 1.42 – 1.22 (m, 9H), 1.18 (d,  $J = 1.8$  Hz, 3H) ppm.  $^{13}\text{C}\{^1\text{H}\}$  NMR (101 MHz,  $\text{CDCl}_3$ )  $\delta$ : 180.8, 173.9, 60.2, 45.1, 37.0, 34.3, 29.8, 29.2, 28.1, 27.1, 25.4, 24.9, 23.7, 22.6, 14.2 ppm. IR(neat): 3701, 2998, 2851, 1730, 1703, 1688, 1647, 1542, 1423, 1344, 1176, 1032, 955, 846, 702, 504, 493. HRMS: calcd for  $\text{C}_{15}\text{H}_{27}\text{O}_4$   $[\text{M}+\text{H}]^+$  271.1909, found 271.1911.

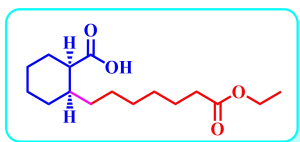

**Cis-2-(7-ethoxy-7-oxoheptyl)cyclohexane-1-carboxylic acid (4aj).**

The reaction was performed following the General Procedure B with  $\text{NiCl}_2 \cdot (\text{PPh}_3)_2$  (39.3 mg, 0.06 mmol), L5 (32.6 mg, 0.09 mmol), **1a** (46.2 mg, 0.3 mmol), Zn powder (39.2 mg, 0.6 mmol), and ethyl 7-bromoheptanoate (**2x**) (142.2 mg, 0.6 mmol). The crude product was purified by flash chromatography on silica gel (eluted with Petroleum ether:EtOAc = 5:1) to give the product (52.9 mg, 62% yield) as a colorless oil.  $R_f = 0.37$  (Petroleum ether:EtOAc = 2:1).  $^1\text{H}$  NMR (400 MHz,  $\text{CDCl}_3$ )  $\delta$ : 4.13 (q,  $J = 7.1$  Hz, 2H), 2.61 (dt,  $J = 8.1, 4.1$  Hz, 1H), 2.28 (t,  $J = 7.5$  Hz, 2H), 1.85 (p,  $J = 9.0, 7.1$  Hz, 1H), 1.79 – 1.59 (m, 6H), 1.56 – 1.39 (m, 3H), 1.39 – 1.26 (m, 9H), 1.26 (t,  $J = 7.1$  Hz, 3H) ppm.  $^{13}\text{C}\{^1\text{H}\}$  NMR (101 MHz,  $\text{CDCl}_3$ )  $\delta$ : 180.6, 174.0, 60.2, 45.1, 36.9, 34.3, 29.8, 29.3, 29.1, 28.1, 27.3, 25.3, 24.9, 23.8, 22.5, 14.2 ppm. IR(neat): 3857, 3443, 2075, 1715, 1689, 1635, 1374, 1246, 581, 419. HRMS: calcd for  $\text{C}_{16}\text{H}_{29}\text{O}_4$   $[\text{M}+\text{H}]^+$  285.3991, found 285.3997.

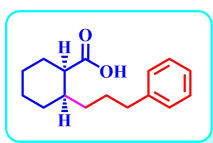

**Cis-2-(3-phenylpropyl)cyclohexane-1-carboxylic acid (4ak).** The reaction was performed following the General Procedure B with  $\text{NiCl}_2 \cdot (\text{PPh}_3)_2$  (39.3 mg, 0.06 mmol), L5 (32.6 mg, 0.09 mmol), **1a** (46.2 mg, 0.3 mmol), Zn powder (39.2 mg, 0.6 mmol), and (3-bromopropyl)benzene (**2y**) (119.4 mg, 0.6 mmol).

The crude product was purified by flash chromatography on silica gel (eluted with Petroleum ether:EtOAc = 5:1) to give the product (52.5 mg, 71% yield) as a colorless oil.  $R_f = 0.37$  (Petroleum ether:EtOAc = 2:1).  $^1\text{H}$  NMR (400 MHz,  $\text{CDCl}_3$ )  $\delta$ : 4.13 (q,  $J = 7.1$  Hz, 2H), 2.61 (dt,  $J = 8.1, 4.1$  Hz, 1H), 2.28 (t,  $J = 7.5$  Hz, 2H), 1.85 (p,  $J = 9.0, 7.1$  Hz, 1H), 1.79 – 1.59 (m, 6H), 1.56 – 1.39 (m, 3H), 1.39 – 1.26 (m, 9H), 1.26 (t,  $J = 7.1$  Hz, 3H) ppm.  $^{13}\text{C}\{^1\text{H}\}$  NMR (101 MHz,  $\text{CDCl}_3$ )  $\delta$ : 181.2, 142.6, 128.3, 128.2, 125.6, 45.1, 36.9, 35.9, 29.7, 29.5, 28.1, 25.3, 23.8, 22.5 ppm. IR(neat): 3449, 2936, 2858, 2077, 1687, 1638, 1496, 1453, 1417, 745, 698, 427. HRMS: calcd for  $\text{C}_{16}\text{H}_{23}\text{O}_2$   $[\text{M}+\text{H}]^+$  247.3526, found 247.3523.

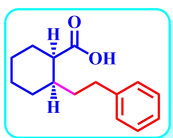

**Cis-2-phenethylcyclohexane-1-carboxylic acid (4al).** The reaction was performed following the General Procedure B with  $\text{NiCl}_2 \cdot (\text{PPh}_3)_2$  (39.3 mg, 0.06 mmol), L5 (32.6 mg, 0.09 mmol), **1a** (46.2 mg, 0.3 mmol), Zn powder (39.2 mg, 0.6 mmol), and (2-bromoethyl)benzene (**2i**) (111 mg, 0.6 mmol). The crude product was

purified by flash chromatography on silica gel (eluted with Petroleum ether:EtOAc = 5:1) to give the product (59.2 mg, 88% yield) as a colorless oil.  $R_f = 0.80$  (Petroleum ether:EtOAc = 2:1).  $^1\text{H}$  NMR (400 MHz,  $\text{CDCl}_3$ )  $\delta$ : 7.28 – 7.23 (m, 2H), 7.23 – 7.05 (m, 3H), 2.73 – 2.60 (m, 2H), 2.62 – 2.52 (m, 1H), 1.97 – 1.84 (m, 1H), 1.83 – 1.66 (m, 4H), 1.66 – 1.55 (m, 3H), 1.52 (q,  $J = 8.2, 7.1$  Hz, 1H), 1.35 (q,  $J = 8.2$  Hz, 2H) ppm.  $^{13}\text{C}\{^1\text{H}\}$  NMR (101 MHz,  $\text{CDCl}_3$ )  $\delta$ : 180.9, 142.4, 128.3, 128.2, 125.7, 44.9, 36.8, 33.8, 32.3, 28.1, 25.6, 23.6, 22.8 ppm. IR(neat): 3633, 2930, 2827, 1709, 1689, 1545, 1377, 1230, 1132, 990, 854, 722, 653, 556, 470. HRMS: calcd for  $\text{C}_{15}\text{H}_{21}\text{O}_2$   $[\text{M}+\text{H}]^+$  233.1542, found 233.1546.

**Cis-2-(8-(hexadecan-8-yloxy)-8-oxooctyl)cyclohexane-1-carboxylic acid (4am).** The reaction was performed following the General Procedure B with  $\text{NiCl}_2 \cdot (\text{PPh}_3)_2$  (39.3 mg, 0.06 mmol), L5 (32.6 mg, 0.09 mmol), **1a** (46.2 mg, 0.3 mmol), Zn powder (39.2 mg, 0.6 mmol), and hexadecan-8-yl-8-bromooctanoate (**2z**)

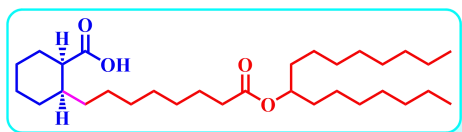

(268.5 mg, 0.6 mmol). The crude product was purified by flash chromatography on silica gel (eluted with Petroleum ether:EtOAc = 5:1) to give the product (108.3 mg, 73% yield) as a colorless oil.  $R_f =$

0.81 (Petroleum ether:EtOAc = 2:1).  $^1\text{H}$  NMR (400 MHz,  $\text{CDCl}_3$ )  $\delta$ : 4.87 (p,  $J$  = 6.3 Hz, 1H), 2.60 (dt,  $J$  = 8.1, 4.2 Hz, 1H), 2.28 (t,  $J$  = 7.5 Hz, 2H), 1.87 – 1.80 (m, 1H), 1.76 – 1.58 (m, 6H), 1.49 (p,  $J$  = 6.8, 6.1 Hz, 5H), 1.27 (d,  $J$  = 10.3 Hz, 35H), 0.88 (t,  $J$  = 6.7 Hz, 6H) ppm.  $^{13}\text{C}\{^1\text{H}\}$  NMR (101 MHz,  $\text{CDCl}_3$ )  $\delta$ : 180.7, 173.8, 74.1, 45.1, 36.9, 34.7, 34.1, 31.8, 29.9, 29.52, 29.49, 29.2, 29.1, 28.1, 27.4, 25.3, 25.1, 23.8, 22.7, 22.5, 14.1 ppm. IR(neat): 3449, 2927, 2855, 2074, 1731, 1716, 1686, 1637, 1464, 1376, 1252, 1175, 1123, 551, 428. HRMS: calcd for  $\text{C}_{31}\text{H}_{59}\text{O}_4$   $[\text{M}+\text{H}]^+$  495.7978, found 495.7972.

**Cis-2-(6-((2-heptylnonanoyl)oxy)hexyl)cyclohexane-1-carboxylic acid (4an).** The reaction was performed following the General Procedure B with  $\text{NiCl}_2\cdot(\text{PPh}_3)_2$  (39.3 mg, 0.06 mmol), L5 (32.6 mg, 0.09 mmol), **1a** (46.2 mg, 0.3 mmol), Zn powder (39.2 mg, 0.6 mmol), and 6-bromoethyl 2-heptylnonanoate (**2a**) (251.4 mg, 0.6 mmol). The crude product was purified by flash chromatography on silica gel (eluted with Petroleum ether:EtOAc = 5:1) to give the product (107.8 mg, 77% yield) as a colorless oil.  $R_f$  = 0.84 (Petroleum ether:EtOAc = 2:1).  $^1\text{H}$  NMR (400 MHz,  $\text{CDCl}_3$ )  $\delta$ : 4.06 (t,  $J$  = 6.7 Hz, 2H), 2.63 – 2.59 (m, 1H), 2.34 – 2.27 (m, 1H), 1.86 – 1.83 (m, 1H), 1.80 – 1.73 (m, 1H), 1.73 – 1.65 (m, 2H), 1.62 – 1.55 (m, 5H), 1.54 – 1.39 (m, 5H), 1.36 – 1.30 (m, 6H), 1.28 – 1.23 (m, 23H), 0.89 – 0.85 (m, 6H) ppm.  $^{13}\text{C}\{^1\text{H}\}$  NMR (101 MHz,  $\text{CDCl}_3$ )  $\delta$ : 180.4, 176.8, 64.1, 45.8, 45.1, 37.0, 32.5, 31.8, 31.7, 29.5, 29.4, 29.33, 29.25, 29.2, 28.6, 28.0, 27.5, 27.4, 25.9, 25.3, 23.7, 22.7, 22.6, 14.11, 14.07 ppm. IR(neat): 3453, 2928, 2856, 2076, 1731, 1717, 1689, 1635, 1464, 1376, 1259, 1163, 617, 443. HRMS: calcd for  $\text{C}_{29}\text{H}_{55}\text{O}_4$   $[\text{M}+\text{H}]^+$  467.7446, found 467.7443.

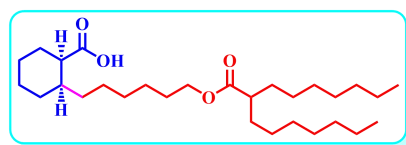

**Cis-[1,1'-bi(cyclohexane)]-2-carboxylic acid (4ao).** The reaction was performed following the General Procedure B with  $\text{NiCl}_2\cdot(\text{PPh}_3)_2$  (39.3 mg, 0.06 mmol), L5 (32.6 mg, 0.09 mmol), **1a** (46.2 mg, 0.3 mmol), Zn powder (39.2 mg, 0.6 mmol), and bromocyclohexane (**2a**) (97.8 mg, 0.6 mmol). The crude product was purified by flash chromatography on silica gel (eluted with Petroleum ether:EtOAc = 5:1) to give the product (35.9 mg, 57% yield) as a colorless oil.  $R_f$  = 0.76 (Petroleum ether:EtOAc = 2:1).  $^1\text{H}$  NMR (400 MHz,  $\text{CDCl}_3$ )  $\delta$ : 2.90 – 2.87 (m, 1H), 2.09 – 2.01 (m, 1H), 1.93 – 1.83 (m, 2H), 1.81 – 1.67 (m, 4H), 1.66 – 1.49 (m, 5H), 1.39 – 1.34 (m, 1H), 1.27 – 1.10 (m, 5H), 0.93 – 0.72 (m, 2H) ppm.  $^{13}\text{C}\{^1\text{H}\}$  NMR (101 MHz,  $\text{CDCl}_3$ )  $\delta$ : 181.3, 44.8, 41.1, 39.5, 31.2, 30.9, 29.4, 26.5, 26.4, 26.3, 26.1, 25.0, 22.1 ppm. IR(neat): 3817, 3423, 2925, 2851, 2092, 1687, 1637, 1448, 1247, 1212, 570. HRMS: calcd for  $\text{C}_{13}\text{H}_{23}\text{O}_2$   $[\text{M}+\text{H}]^+$  211.3205, found 211.3201.

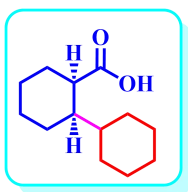

**Cis-2-phenethylcyclopentane-1-carboxylic acid (4bl).** The reaction was performed following the General Procedure B with  $\text{NiCl}_2\cdot(\text{PPh}_3)_2$  (39.3 mg, 0.06 mmol), L5 (32.6 mg, 0.09 mmol), **1e** (42.0 mg, 0.3 mmol), Zn powder (39.2 mg, 0.6 mmol), and (2-bromoethyl)benzene (**2l**) (111.0 mg, 0.6 mmol). The crude product was purified by flash chromatography on silica gel (eluted with Petroleum ether:EtOAc = 5:1) to give the product (48.5 mg, 74% yield) as a colorless oil.  $R_f$  = 0.62 (Petroleum ether:EtOAc = 2:1).  $^1\text{H}$  NMR (400 MHz,  $\text{CDCl}_3$ )  $\delta$ : 7.25 (d,  $J$  = 7.3 Hz, 2H), 7.19 – 7.13 (m, 3H), 2.88 (s, 1H), 2.70 – 2.60 (m, 2H), 2.15 – 2.05 (m, 1H), 1.98 – 1.91 (m, 1H), 1.89 – 1.70 (m, 4H), 1.65 – 1.48 (m, 3H) ppm.  $^{13}\text{C}\{^1\text{H}\}$  NMR (101 MHz,  $\text{CDCl}_3$ )  $\delta$ : 175.3, 142.3, 128.4, 128.3, 125.7, 43.2, 34.8, 32.8, 30.9, 28.6, 23.7 ppm. One resonance was not observed due to overlapping resonances. IR(neat): 3350, 2963, 2874, 2732, 1705, 1683, 1663, 1450, 1319, 1188, 1065, 988, 843, 753, 502, 426. HRMS: calcd for  $\text{C}_{14}\text{H}_{19}\text{O}_2$   $[\text{M}+\text{H}]^+$  219.1385, found 219.1383.

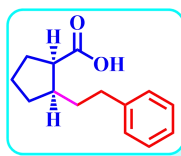

**Cis-2-phenethylcyclopentane-1-carboxylic acid (4bl).** The reaction was performed following the General Procedure B with  $\text{NiCl}_2\cdot(\text{PPh}_3)_2$  (39.3 mg, 0.06 mmol), L5 (32.6 mg, 0.09 mmol), **1e** (42.0 mg, 0.3 mmol), Zn powder (39.2 mg, 0.6 mmol), and (2-bromoethyl)benzene (**2l**) (111.0 mg, 0.6 mmol). The crude product was purified by flash chromatography on silica gel (eluted with Petroleum ether:EtOAc = 5:1) to give the product (48.5 mg, 74% yield) as a colorless oil.  $R_f$  = 0.62 (Petroleum ether:EtOAc = 2:1).  $^1\text{H}$  NMR (400 MHz,  $\text{CDCl}_3$ )  $\delta$ : 7.25 (d,  $J$  = 7.3 Hz, 2H), 7.19 – 7.13 (m, 3H), 2.88 (s, 1H), 2.70 – 2.60 (m, 2H), 2.15 – 2.05 (m, 1H), 1.98 – 1.91 (m, 1H), 1.89 – 1.70 (m, 4H), 1.65 – 1.48 (m, 3H) ppm.  $^{13}\text{C}\{^1\text{H}\}$  NMR (101 MHz,  $\text{CDCl}_3$ )  $\delta$ : 175.3, 142.3, 128.4, 128.3, 125.7, 43.2, 34.8, 32.8, 30.9, 28.6, 23.7 ppm. One resonance was not observed due to overlapping resonances. IR(neat): 3350, 2963, 2874, 2732, 1705, 1683, 1663, 1450, 1319, 1188, 1065, 988, 843, 753, 502, 426. HRMS: calcd for  $\text{C}_{14}\text{H}_{19}\text{O}_2$   $[\text{M}+\text{H}]^+$  219.1385, found 219.1383.

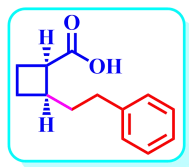

**Cis-2-phenethylcyclobutane-1-carboxylic acid (4cl).** The reaction was performed following the General Procedure B with  $\text{NiCl}_2 \cdot (\text{PPh}_3)_2$  (39.3 mg, 0.06 mmol), **L5** (32.6 mg, 0.09 mmol), **1h** (37.8 mg, 0.3 mmol), Zn powder (39.2 mg, 0.6 mmol), and (2-bromoethyl)benzene (**2I**) (111.0 mg, 0.6 mmol). The crude product was purified by flash chromatography on silica gel (eluted with Petroleum ether:EtOAc = 5:1) to give the product (44.7 mg, 73% yield) as a colorless oil.  $R_f = 0.62$  (Petroleum ether:EtOAc = 2:1).  $^1\text{H}$  NMR (400 MHz,  $\text{CDCl}_3$ )  $\delta$ : 9.14 (s, 1H), 7.17 (t,  $J = 6.5$  Hz, 2H), 7.11 – 7.05 (m, 3H), 3.19 (s, 1H), 2.65 – 2.57 (m, 1H), 2.47 (dd,  $J = 21.3, 12.1$  Hz, 2H), 2.24 – 2.16 (m, 1H), 2.06 – 1.94 (m, 2H), 1.89 – 1.75 (m, 2H), 1.70 – 1.60 (m, 1H) ppm.  $^{13}\text{C}\{^1\text{H}\}$  NMR (101 MHz,  $\text{CDCl}_3$ )  $\delta$ : 175.3, 141.9, 128.4, 128.3, 125.7, 37.2, 33.4, 32.9, 24.9, 20.4 ppm. One resonance was not observed due to overlapping resonances. IR(neat): 3402, 2927, 2804, 2723, 1704, 1683, 1497, 1343, 1209, 1004, 986, 832, 702, 656, 586, 372. HRMS: calcd for  $\text{C}_{13}\text{H}_{17}\text{O}_2$   $[\text{M}+\text{H}]^+$  205.1229, found 205.1228.

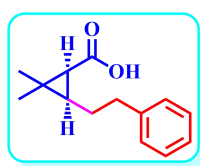

**Cis-2-phenethylcyclobutane-1-carboxylic acid (4dl).** The reaction was performed following the General Procedure B with  $\text{NiCl}_2 \cdot (\text{PPh}_3)_2$  (39.3 mg, 0.06 mmol), **L5** (32.6 mg, 0.09 mmol), **1i** (40.0 mg, 0.3 mmol), Zn powder (39.2 mg, 0.6 mmol), and (2-bromoethyl)benzene (**2I**) (111.0 mg, 0.6 mmol). The crude product was purified by flash chromatography on silica gel (eluted with Petroleum ether:EtOAc = 5:1) to give the product (65.4 mg, 82% yield) as a colorless oil.  $R_f = 0.65$  (Petroleum ether:EtOAc = 2:1).  $^1\text{H}$  NMR (400 MHz,  $\text{CDCl}_3$ )  $\delta$ : 7.19 (dt,  $J = 6.3, 1.8$  Hz, 2H), 7.12 – 7.08 (m, 3H), 2.63 – 2.51 (m, 2H), 1.94 – 1.87 (m, 2H), 1.36 (d,  $J = 8.8$  Hz, 1H), 1.17 – 1.11 (m, 1H), 1.07 (d,  $J = 5.7$  Hz, 6H) ppm.  $^{13}\text{C}\{^1\text{H}\}$  NMR (101 MHz,  $\text{CDCl}_3$ )  $\delta$ : 178.3, 142.0, 128.6, 128.2, 125.7, 35.9, 34.5, 29.0, 28.5, 27.0, 25.5, 14.2 ppm. IR(neat): 3402, 2927, 2853, 2798, 1705, 1682, 1662, 1475, 1372, 1227, 1163, 952, 847, 753, 664, 562, 482, 417. HRMS: calcd for  $\text{C}_{14}\text{H}_{19}\text{O}_2$   $[\text{M}+\text{H}]^+$  219.1385, found 219.1383.

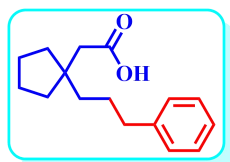

**2-(1-(3-phenylpropyl)cyclopentyl)acetic acid (4el).** The reaction was performed following the General Procedure B with  $\text{NiCl}_2 \cdot (\text{PPh}_3)_2$  (39.3 mg, 0.06 mmol), **L5** (32.6 mg, 0.09 mmol), **1j** (50.4 mg, 0.3 mmol), Zn powder (39.2 mg, 0.6 mmol), and (2-bromoethyl)benzene (**2I**) (111.0 mg, 0.6 mmol). The crude product was purified by flash chromatography on silica gel (eluted with Petroleum ether:EtOAc = 5:1) to give the product (41.8 mg, 83% yield) as a colorless oil.  $R_f = 0.72$  (Petroleum ether:EtOAc = 2:1).  $^1\text{H}$  NMR (400 MHz,  $\text{CDCl}_3$ )  $\delta$ : 7.26 (dd,  $J = 5.1, 3.1$  Hz, 2H), 7.20 – 7.14 (m, 3H), 2.59 (t,  $J = 7.6$  Hz, 2H), 2.33 (s, 2H), 1.68 – 1.55 (m, 8H), 1.48 (q,  $J = 8.2, 6.5$  Hz, 4H) ppm.  $^{13}\text{C}\{^1\text{H}\}$  NMR (101 MHz,  $\text{CDCl}_3$ )  $\delta$ : 182.6, 142.6, 128.3, 128.2, 125.6, 44.6, 42.3, 38.8, 37.6, 36.6, 32.8, 26.9, 24.3 ppm. One resonance was not observed due to overlapping resonances. IR(neat): 3313, 2934, 2855, 2763, 1705, 1682, 1490, 1313, 1207, 1173, 932, 982, 857, 777, 672, 517, 493. HRMS: calcd for  $\text{C}_{16}\text{H}_{23}\text{O}_2$   $[\text{M}+\text{H}]^+$  247.1698, found 247.1700.

## 9. References

1. Bercot, E. A.; Rovis, T. *J. Am. Chem. Soc.* **2005**, *127*, 247.

## 10. NMR Spectra

### *Cis*-2-(cyclohexanecarbonyl)cyclohexane-1-carboxylic acid (**3aa**)

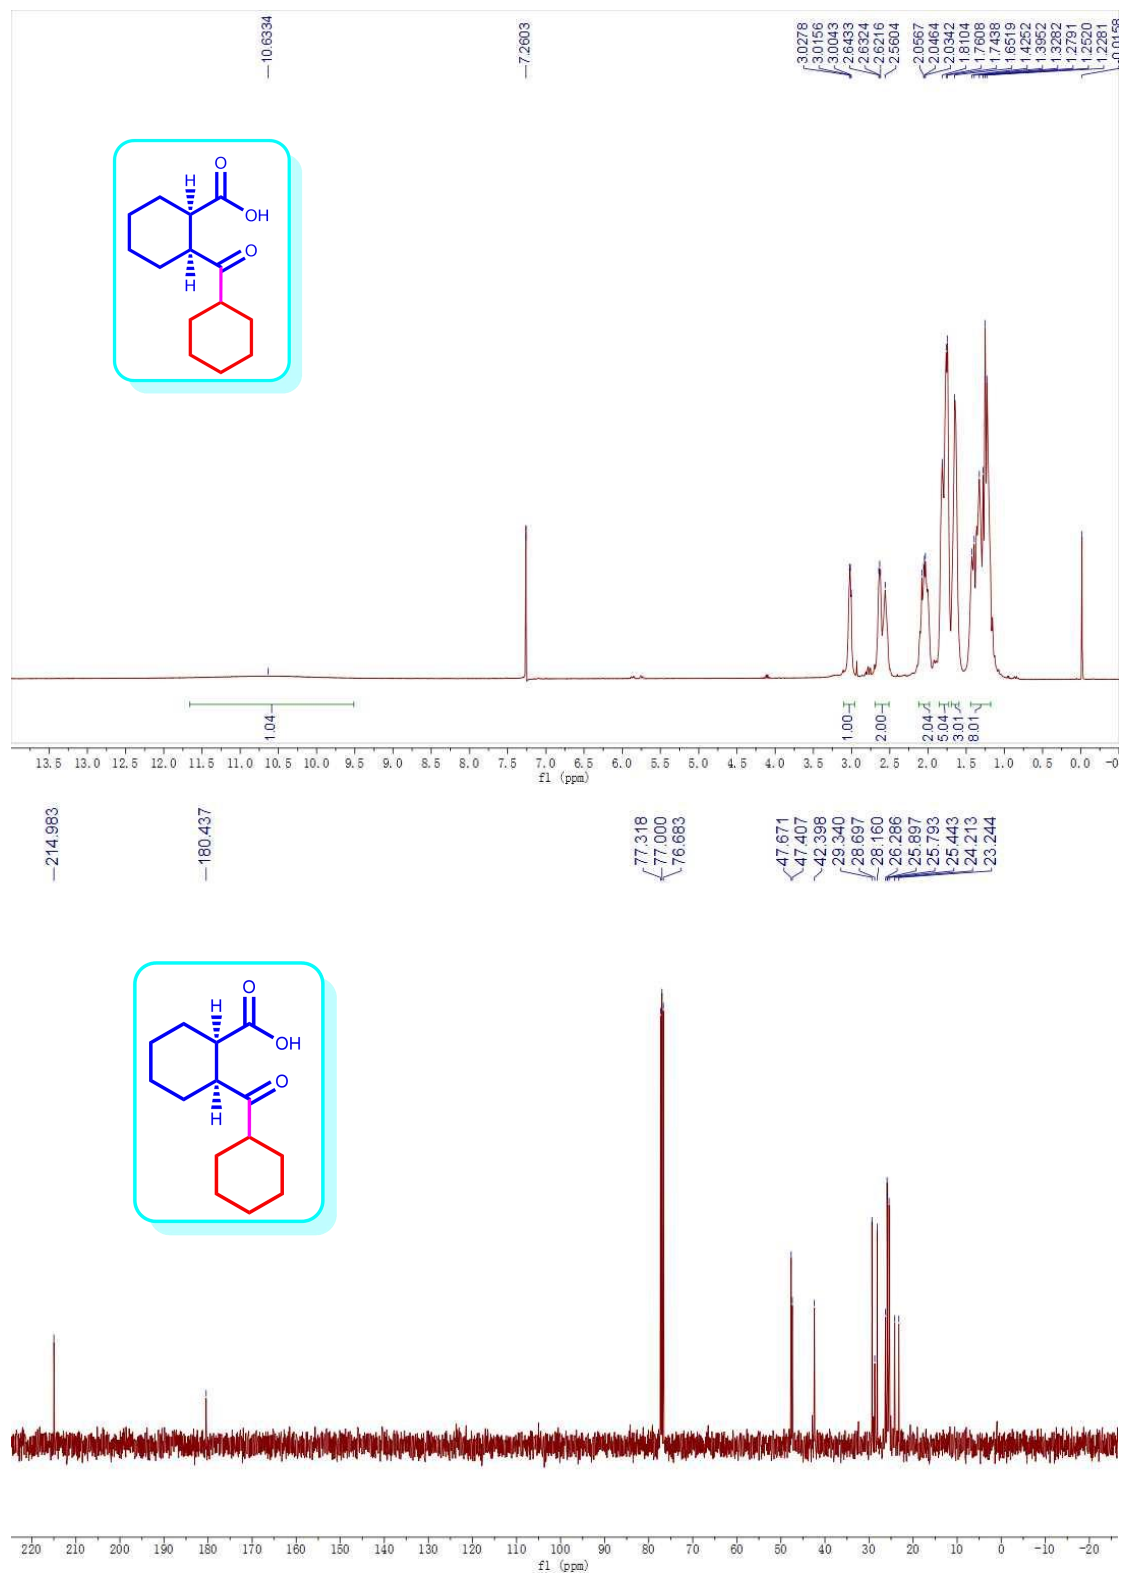

Figure S8.  $^1\text{H}$  (400 MHz) and  $^{13}\text{C}$  { $^1\text{H}$ } (101 MHz) NMR spectra of **3aa** in  $\text{CDCl}_3$

***Cis*-2-(cyclopentanecarbonyl)cyclohexane-1-carboxylic acid (3ab)**

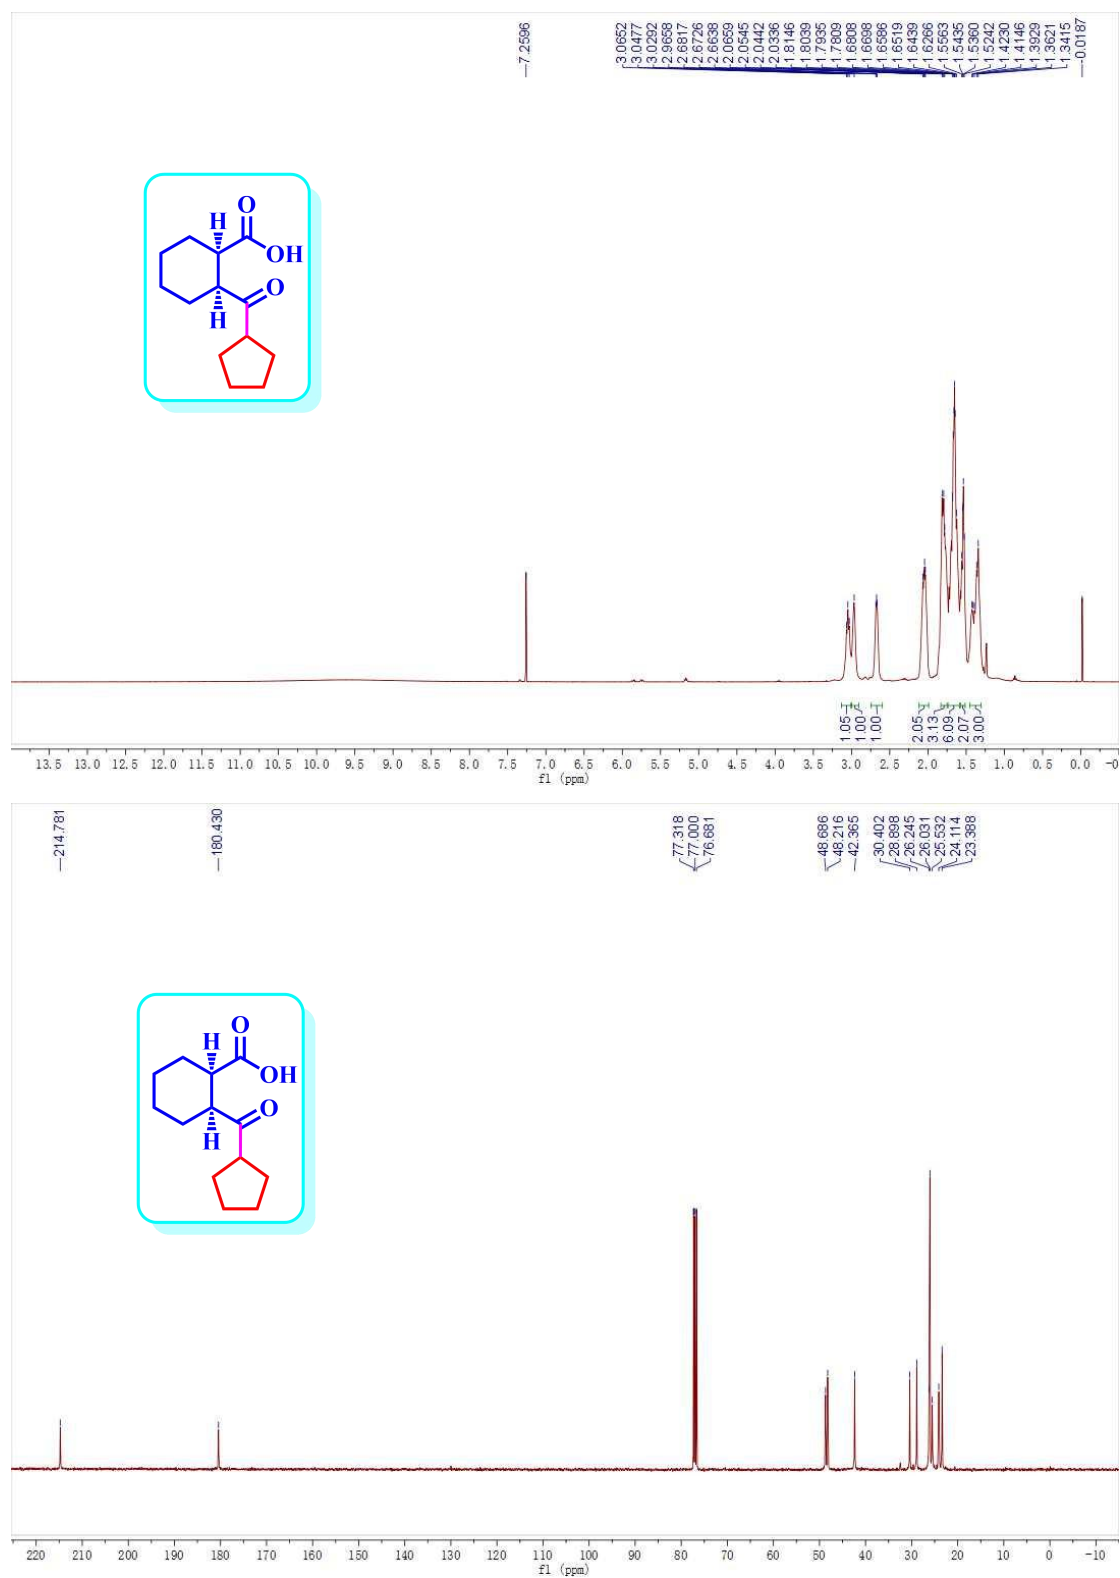

**Figure S9.** <sup>1</sup>H (400 MHz) and <sup>13</sup>C {<sup>1</sup>H} (101 MHz) NMR spectra of 3ab in CDCl<sub>3</sub>

*Cis*-2-isobutyrylcyclohexane-1-carboxylic acid (**3ac**)

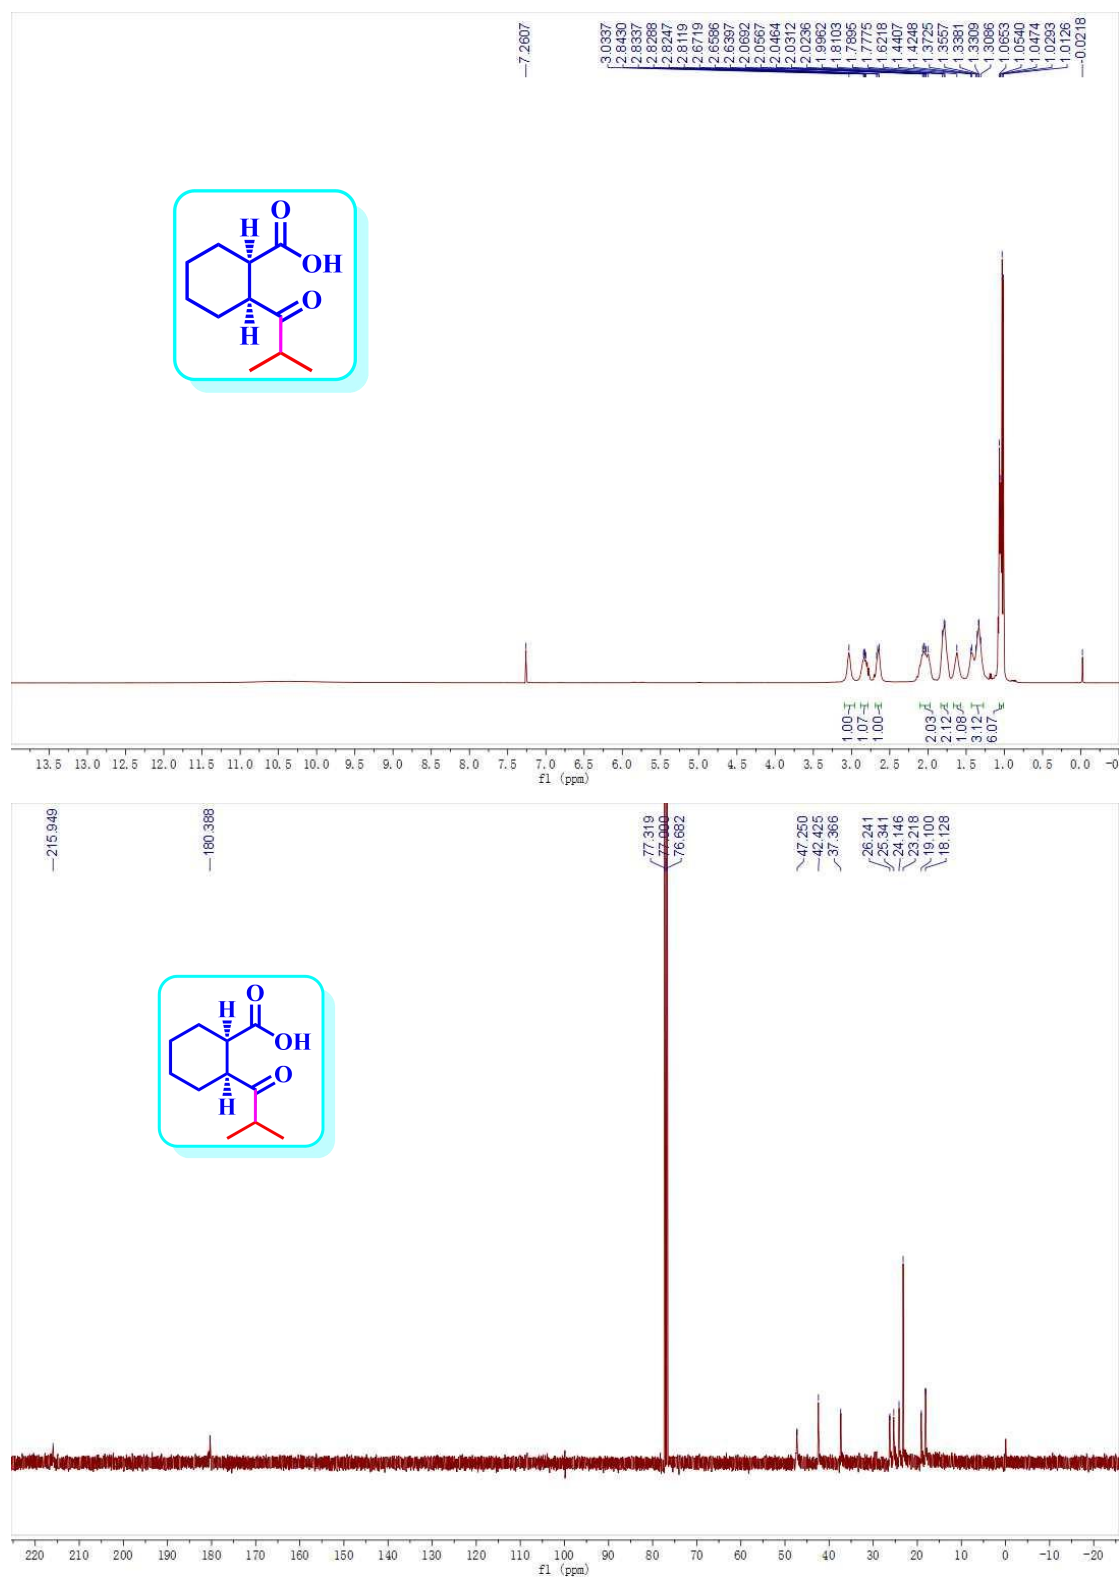

Figure S10. <sup>1</sup>H (400 MHz) and <sup>13</sup>C {<sup>1</sup>H} (101 MHz) NMR spectra of **3ac** in CDCl<sub>3</sub>

***Cis*-2-(2-ethylbutanoyl)cyclohexane-1-carboxylic acid (3ad).**

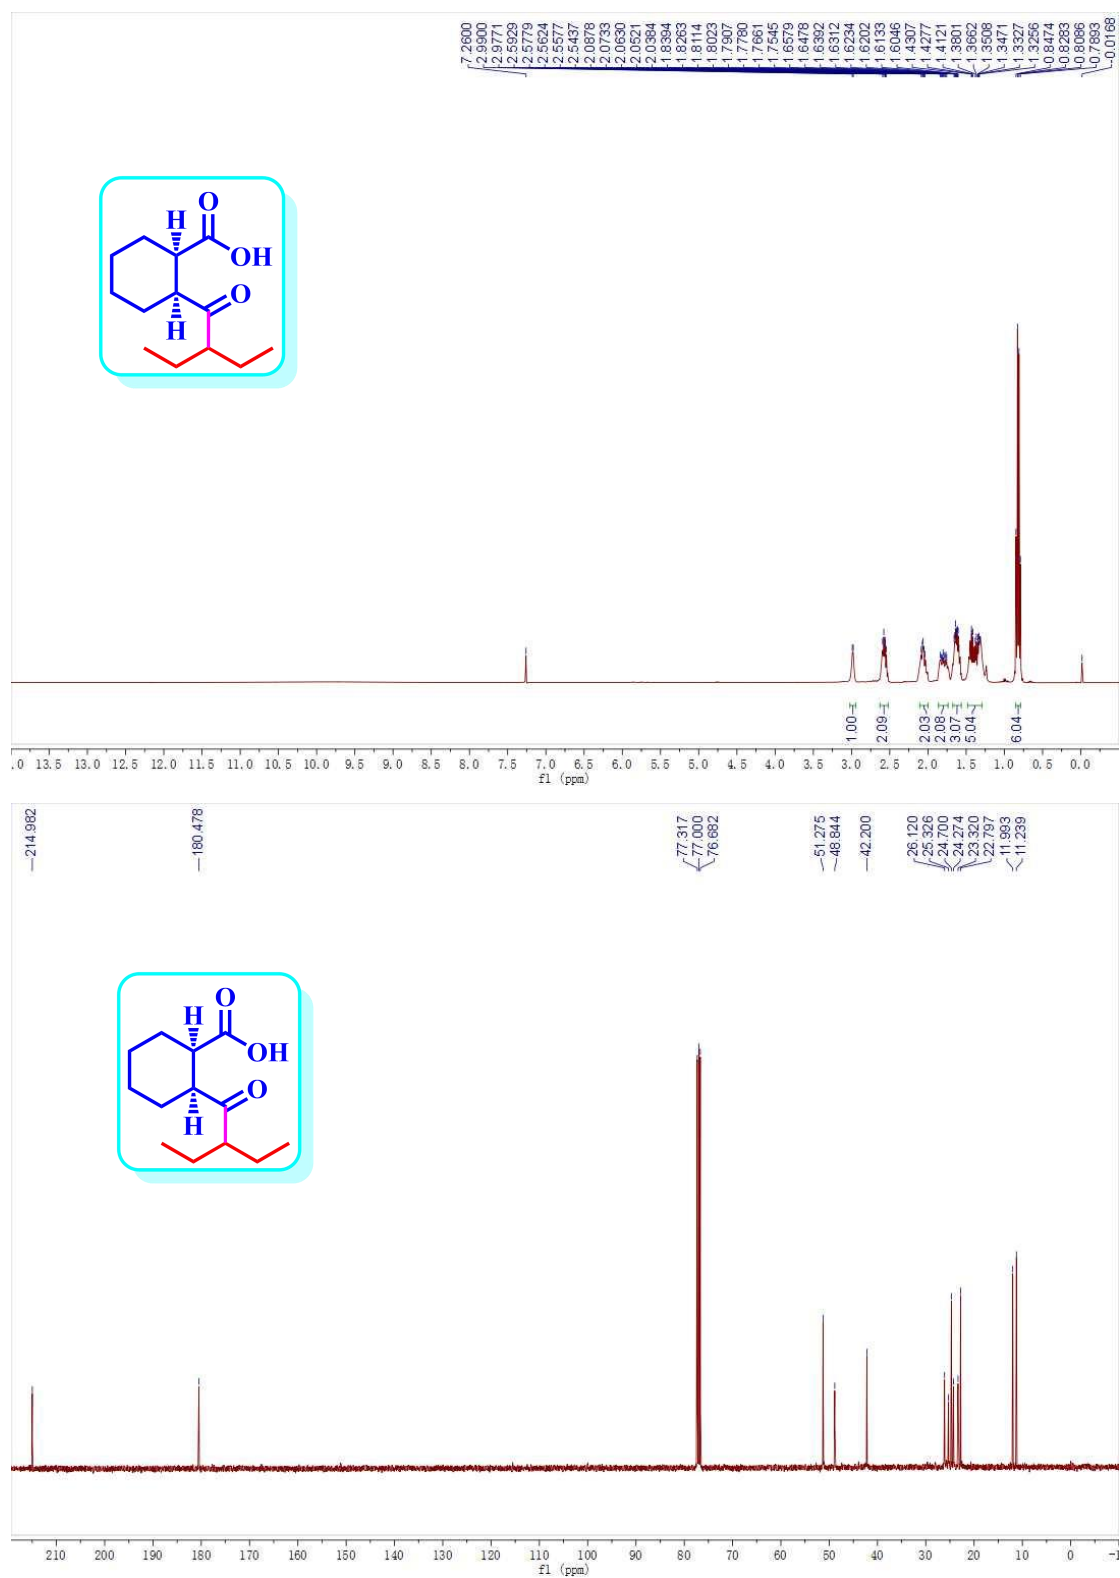

**Figure S11.** <sup>1</sup>H (400 MHz) and <sup>13</sup>C {<sup>1</sup>H} (101 MHz) NMR spectra of 3ad in CDCl<sub>3</sub>

*Cis*-2-pentanoylcyclohexane-1-carboxylic acid (**3ae**)

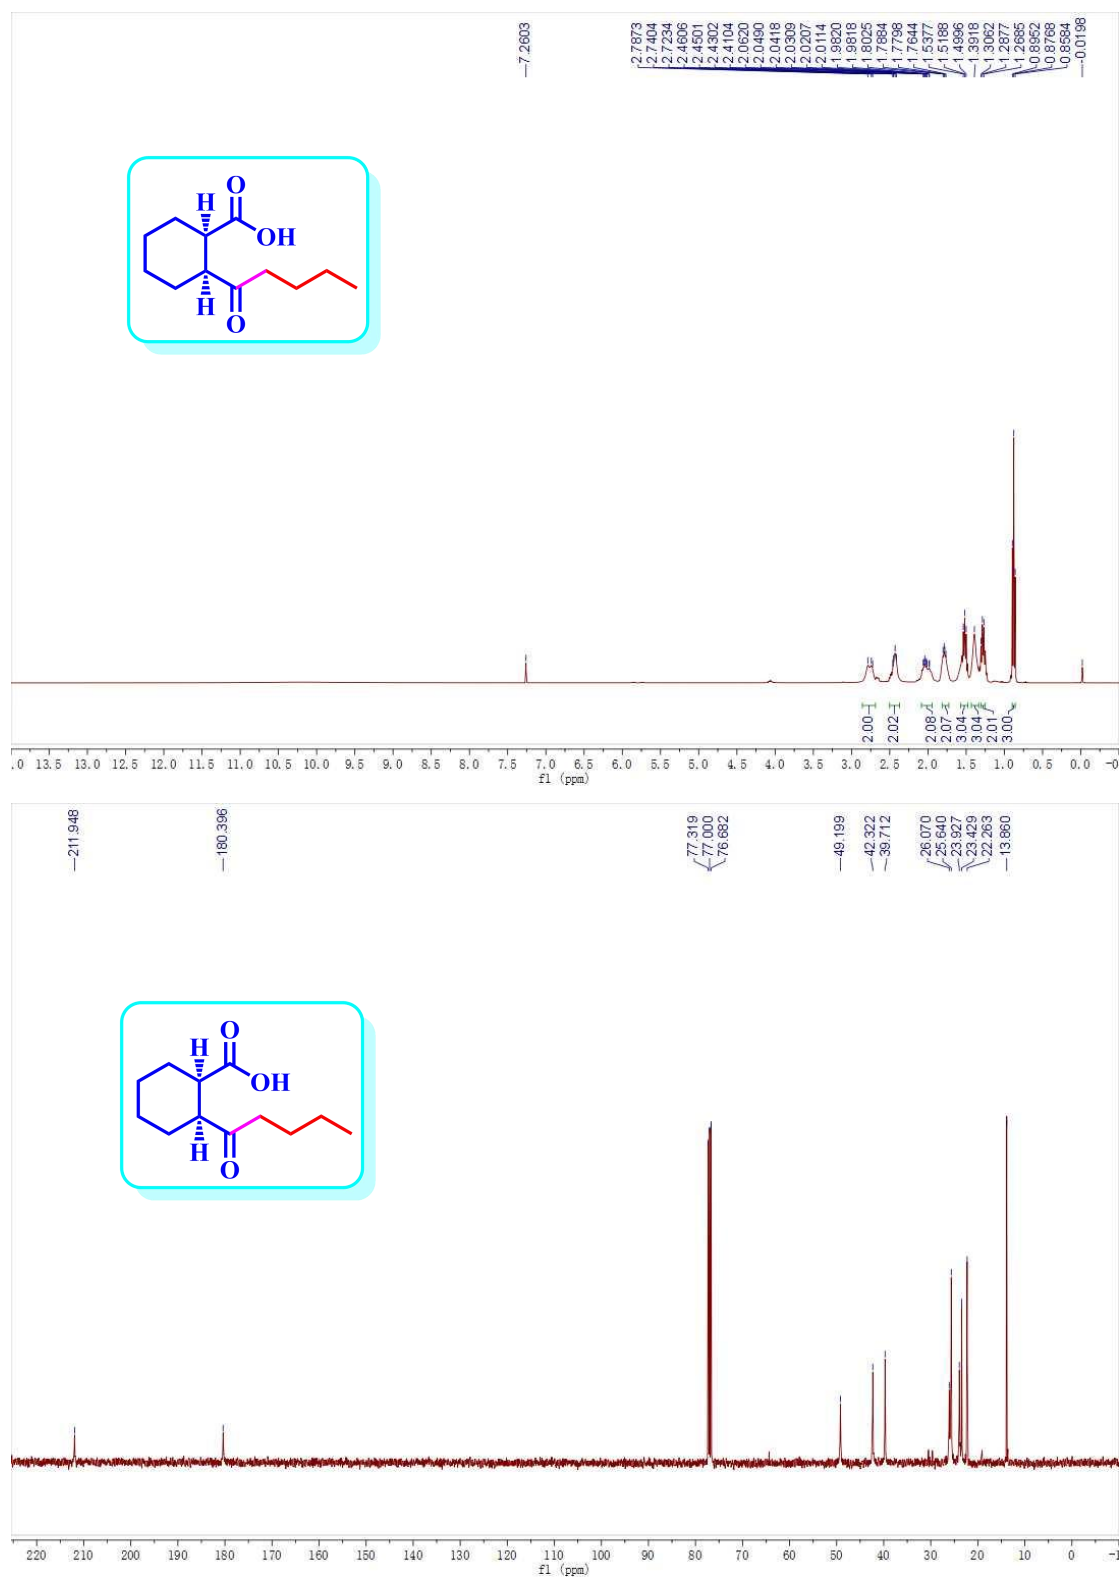

Figure S12. <sup>1</sup>H (400 MHz) and <sup>13</sup>C {<sup>1</sup>H} (101 MHz) NMR spectra of **3ae** in CDCl<sub>3</sub>

*Cis*-2-heptanoylcyclohexane-1-carboxylic acid (3af)

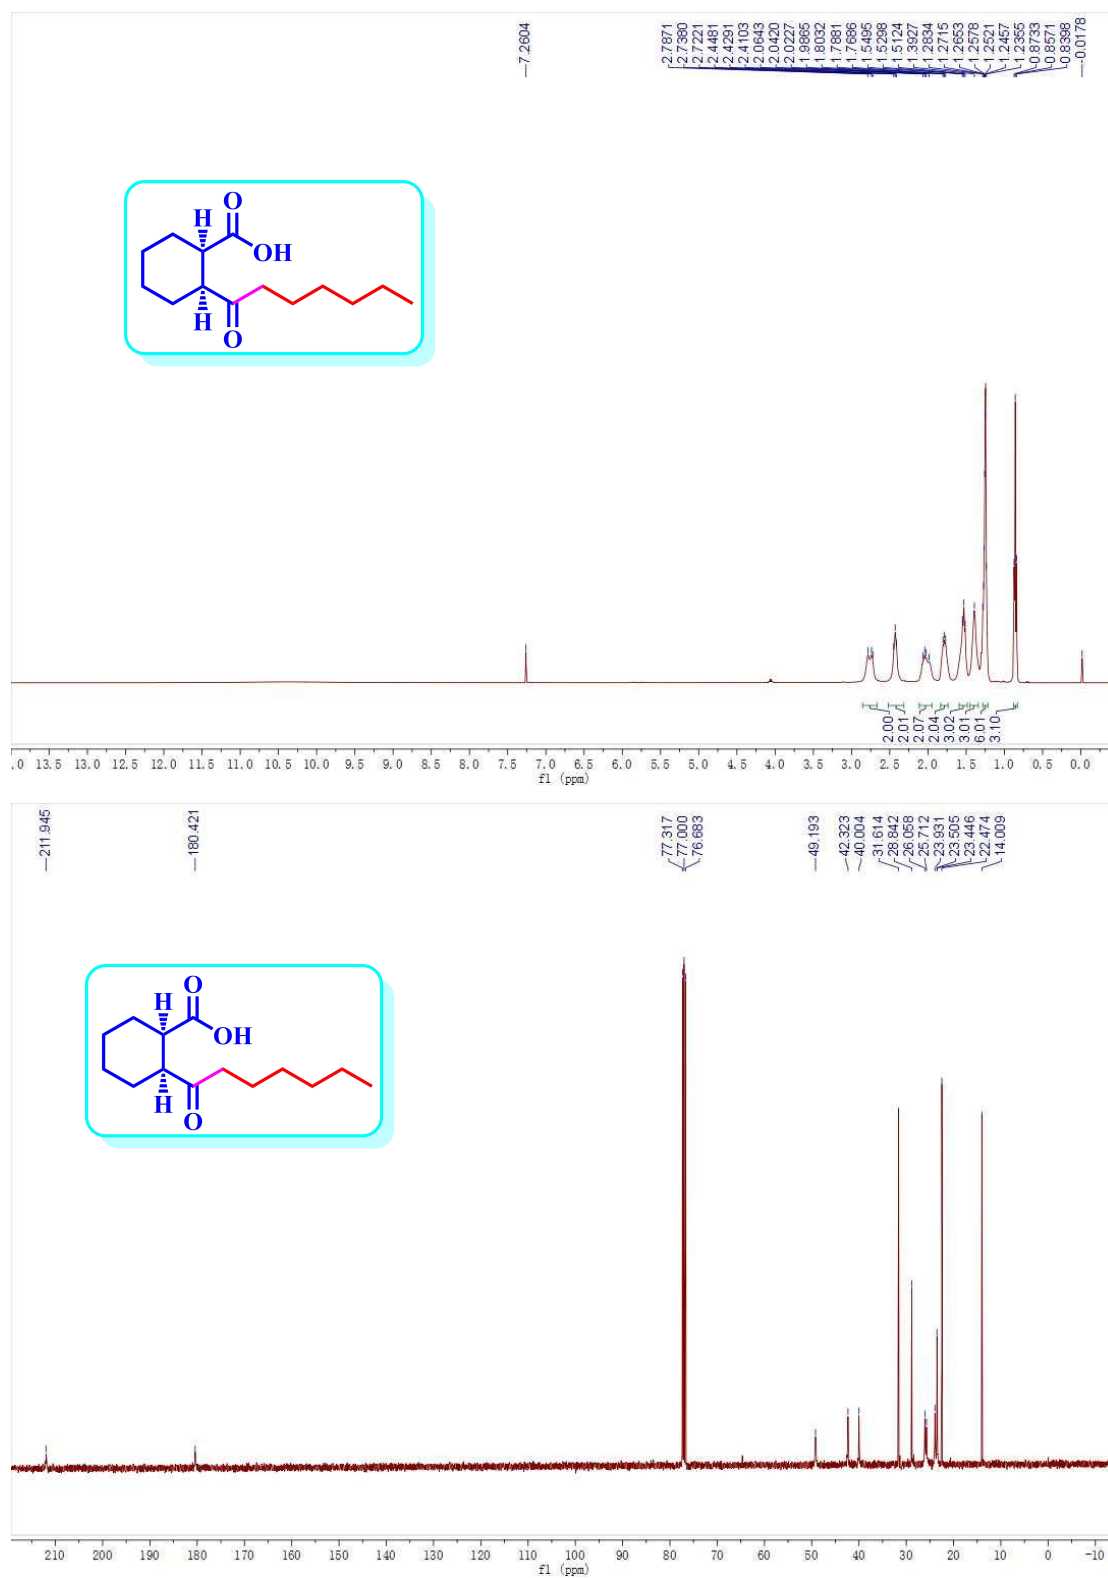

Figure S13. <sup>1</sup>H (400 MHz) and <sup>13</sup>C {<sup>1</sup>H} (101 MHz) NMR spectra of 3af in CDCl<sub>3</sub>

***Cis*-2-nonanoylcyclohexane-1-carboxylic acid (3ag)**

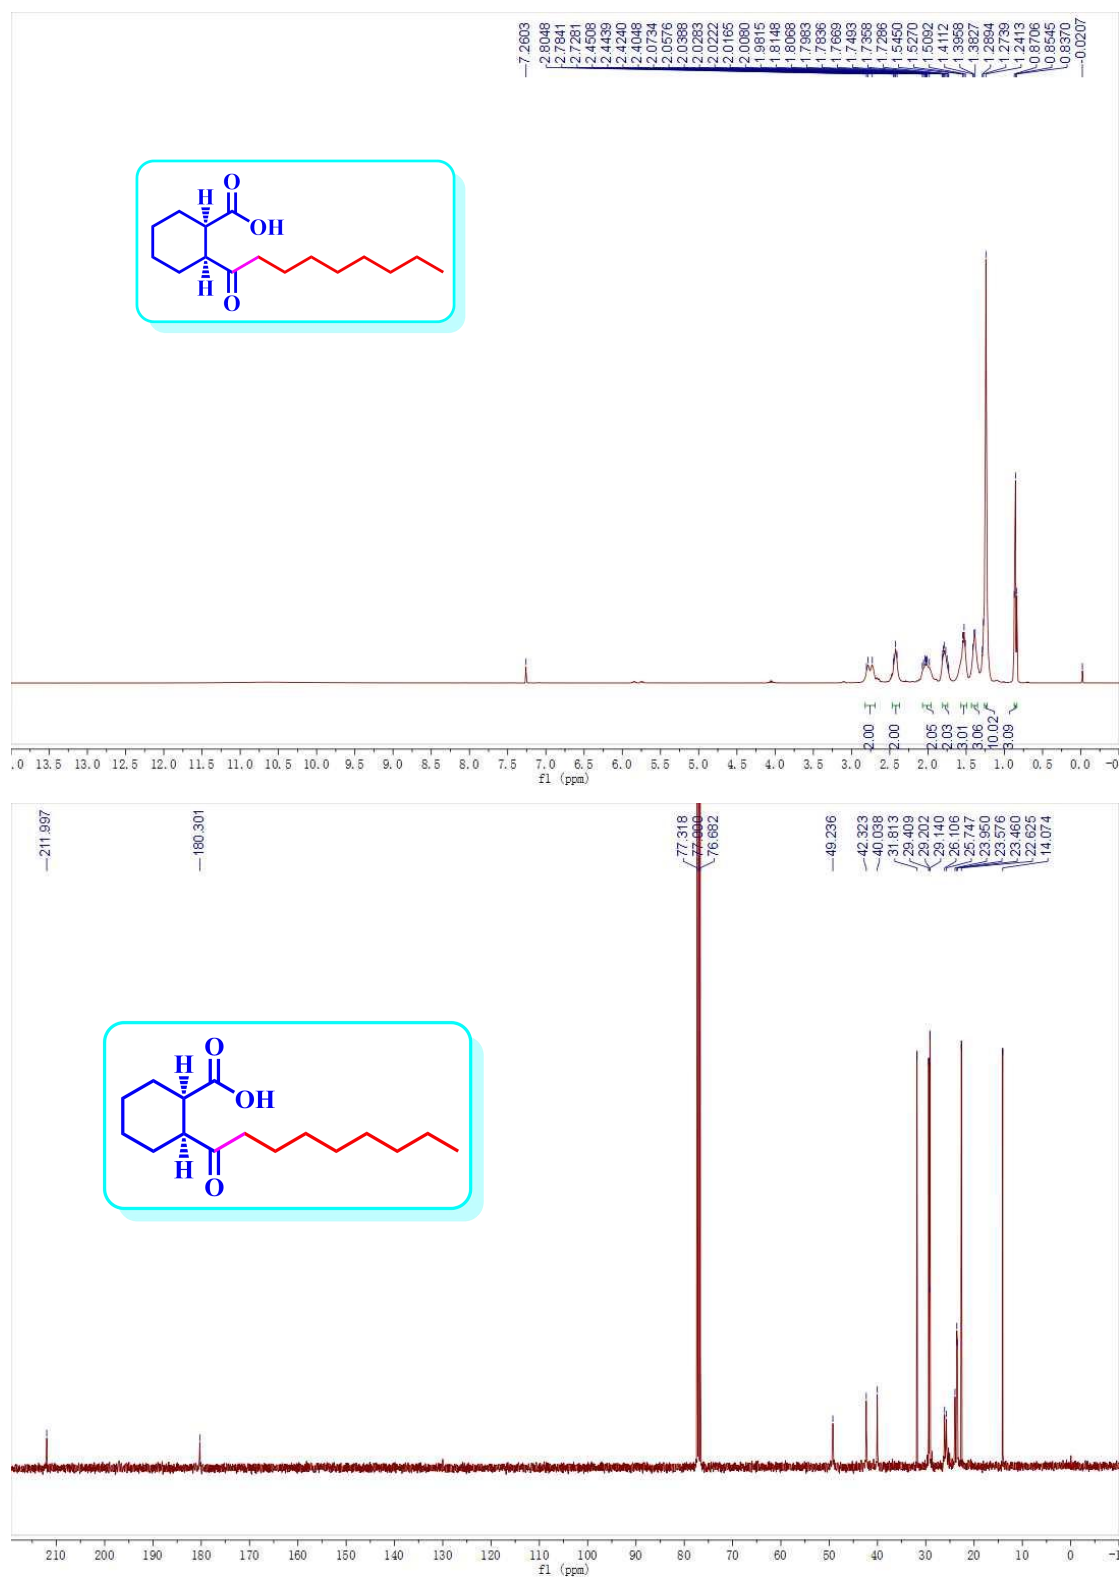

**Figure S14.** <sup>1</sup>H (400 MHz) and <sup>13</sup>C {<sup>1</sup>H} (101 MHz) NMR spectra of 3ag in CDCl<sub>3</sub>

***Cis*-2-(3-methylbutanoyl)cyclohexane-1-carboxylic acid (3ah)**

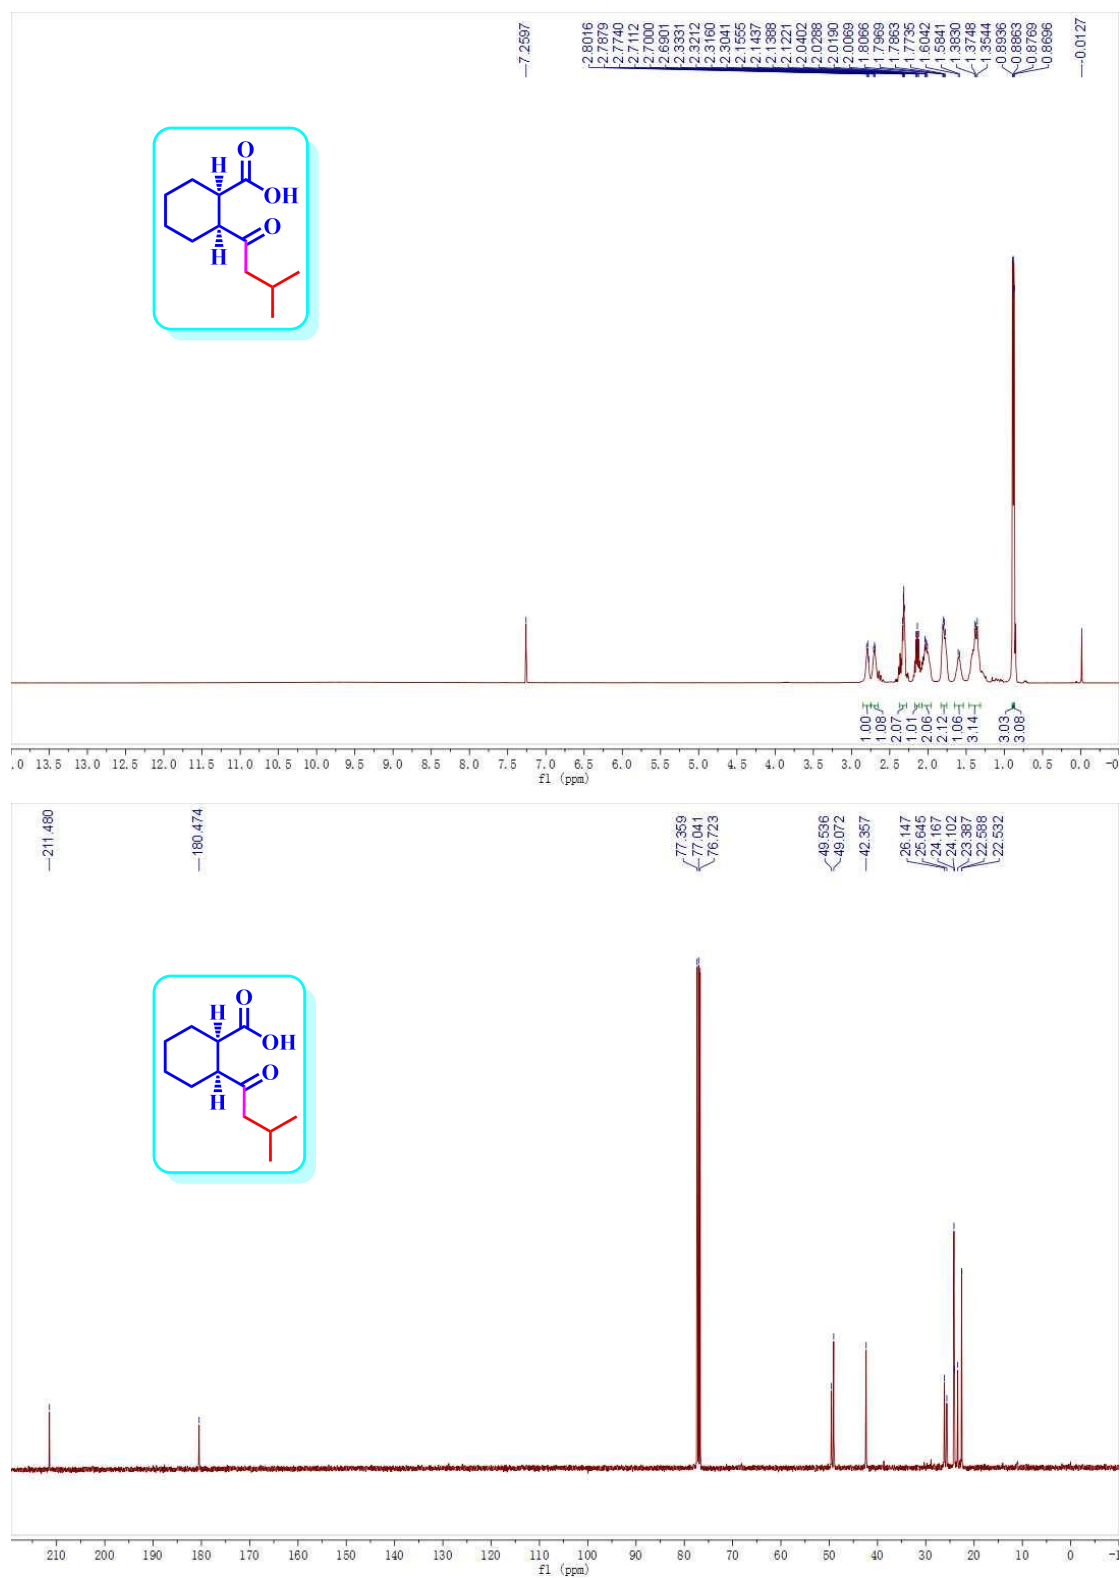

**Figure S15.** <sup>1</sup>H (400 MHz) and <sup>13</sup>C {<sup>1</sup>H} (101 MHz) NMR spectra of 3ah in CDCl<sub>3</sub>

**Cis-2-(2-cyclohexylacetyl)cyclohexane-1-carboxylic acid (3ai)**

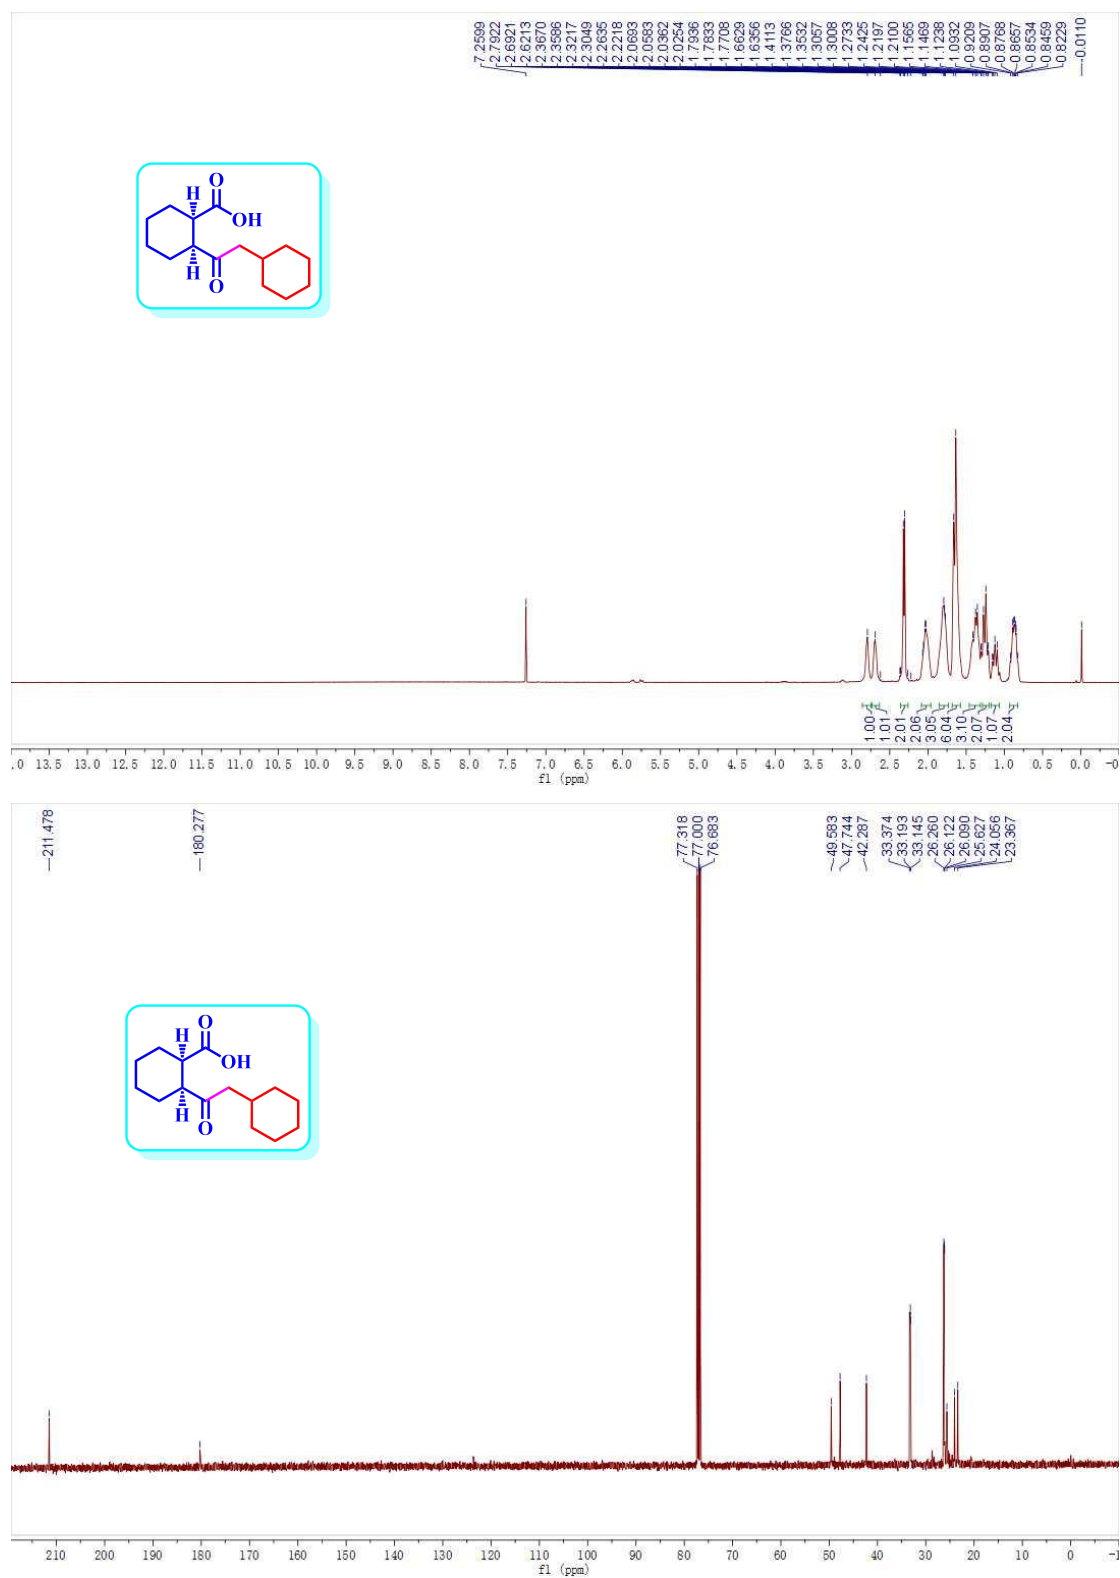

**Figure S16. <sup>1</sup>H (400 MHz) and <sup>13</sup>C {<sup>1</sup>H} (101 MHz) NMR spectra of 3ai in CDCl<sub>3</sub>**

***Cis*-2-(5-fluoropentanoyl)cyclohexane-1-carboxylic acid (3aj)**

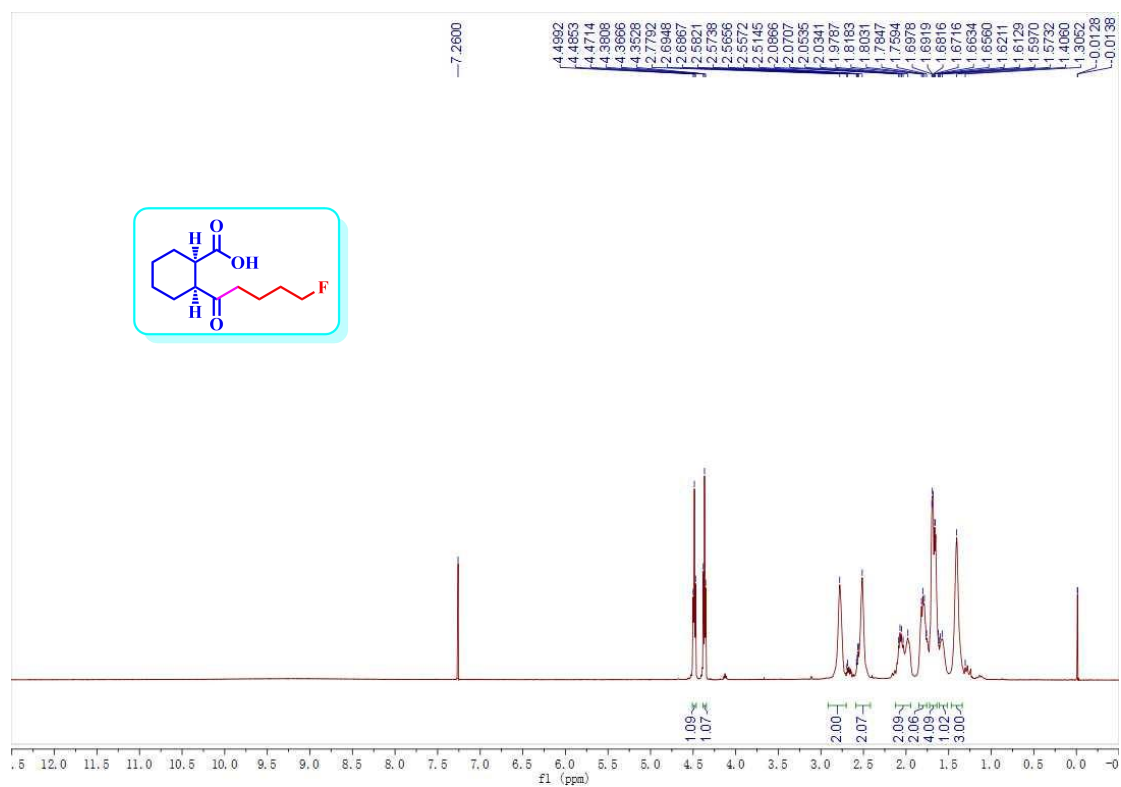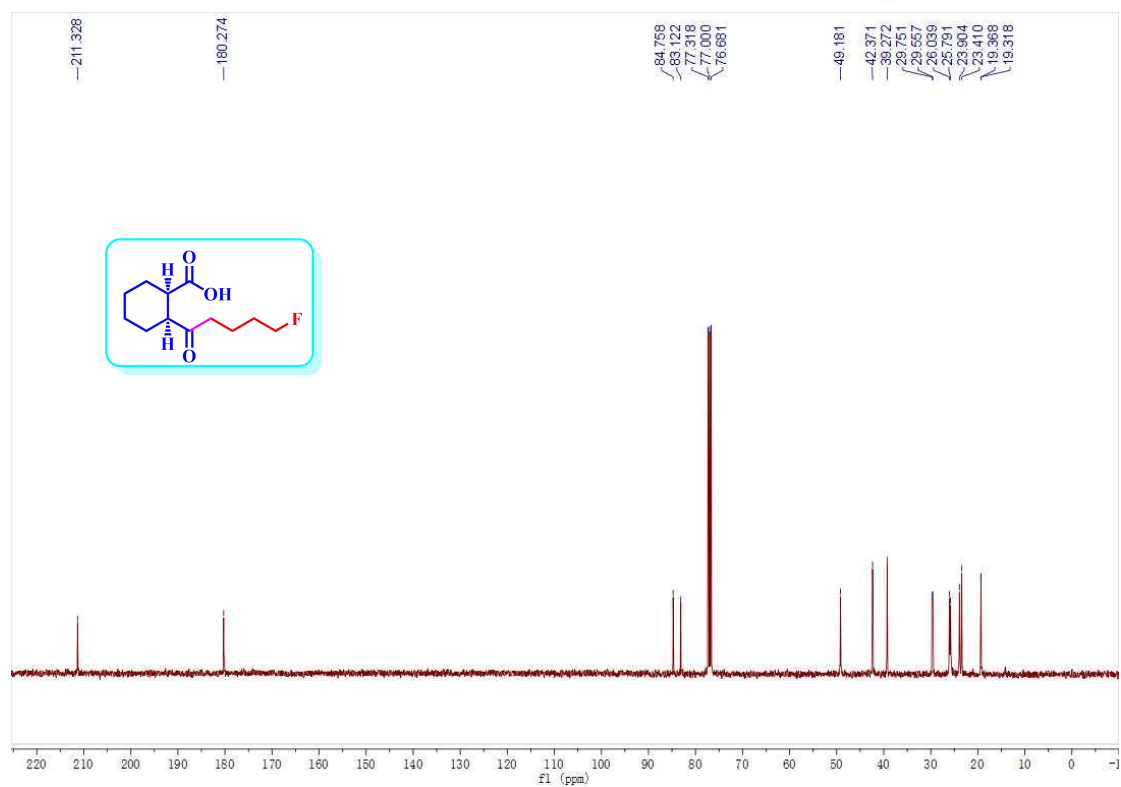

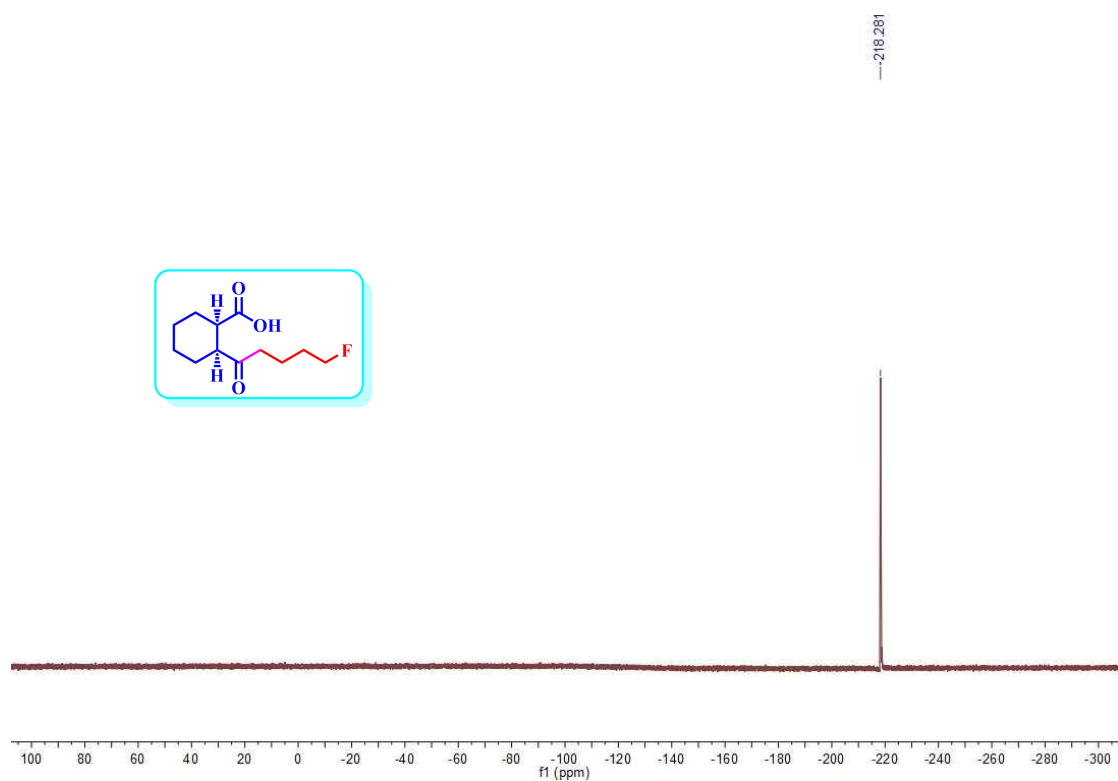

Figure S17.  $^1\text{H}$  (400 MHz) and  $^{13}\text{C}$   $\{^1\text{H}\}$  (101 MHz) NMR and  $^{19}\text{F}$  NMR spectra of 3aj in  $\text{CDCl}_3$

**Cis-2-(5-chloropentanoyl)cyclohexane-1-carboxylic acid (3ak)**

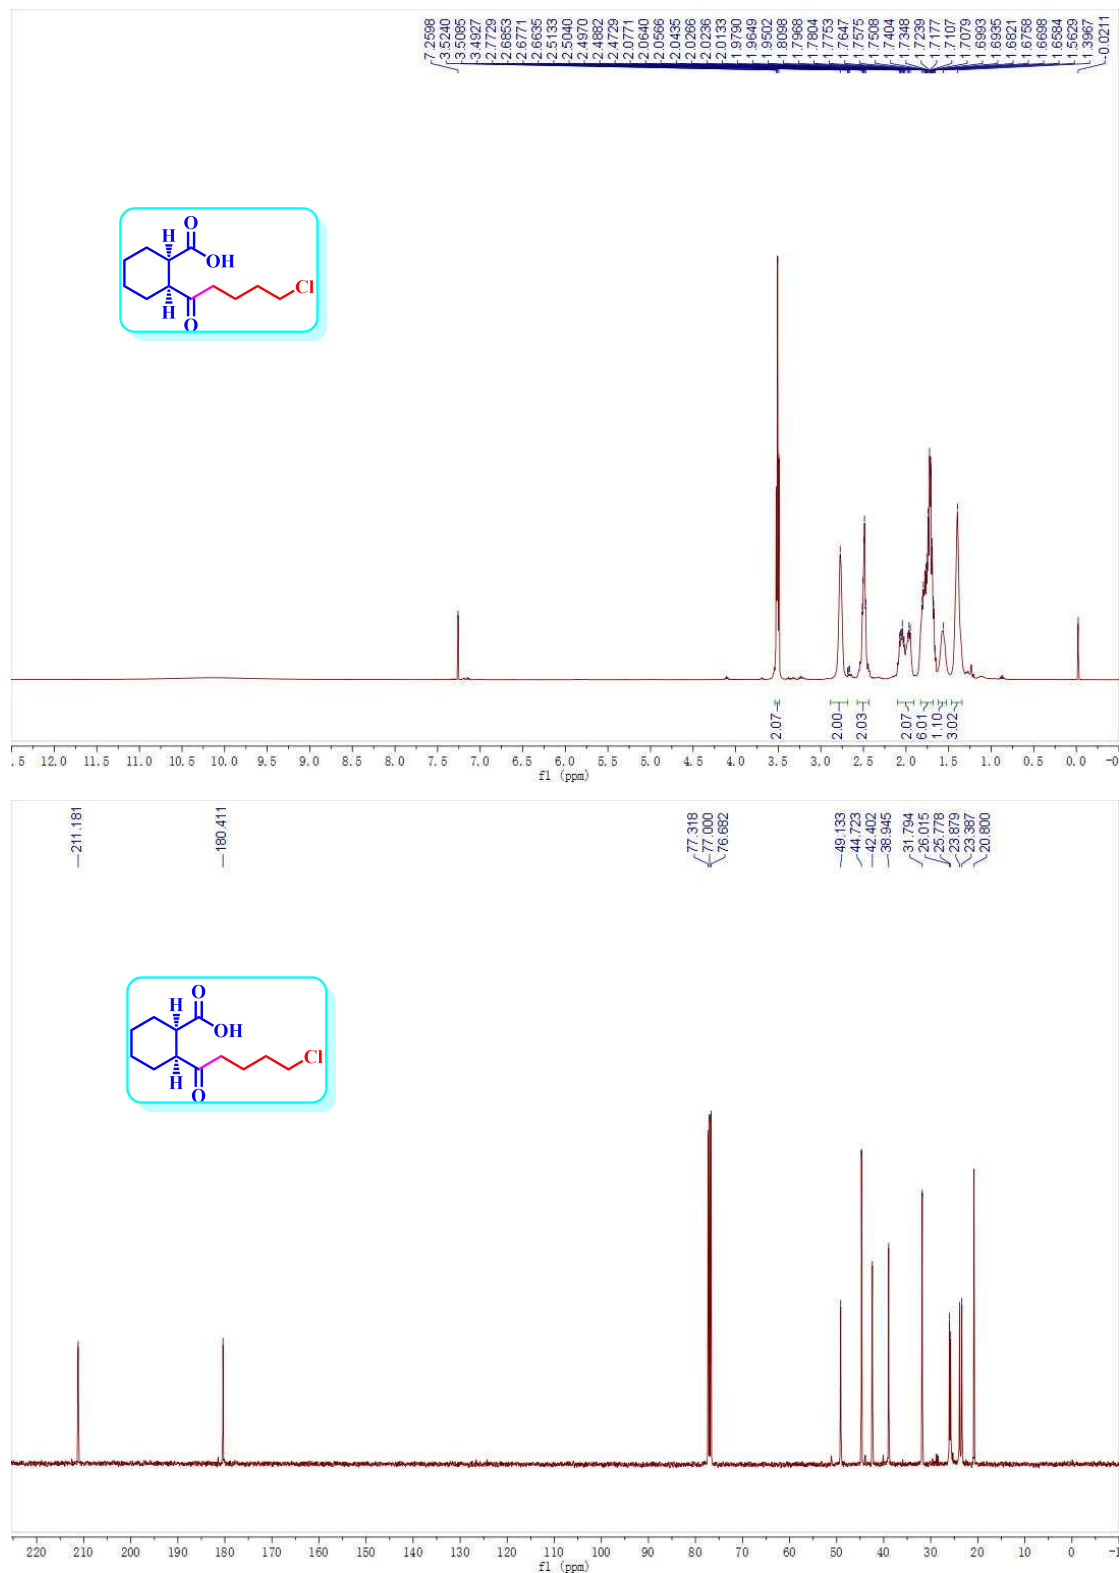

**Figure S18.  $^1\text{H}$  (400 MHz) and  $^{13}\text{C}$   $\{^1\text{H}\}$  (101 MHz) NMR spectra of 3ak in  $\text{CDCl}_3$**

**Cis -2-(3-phenylpropanoyl)cyclohexane-1-carboxylic acid (3a)**

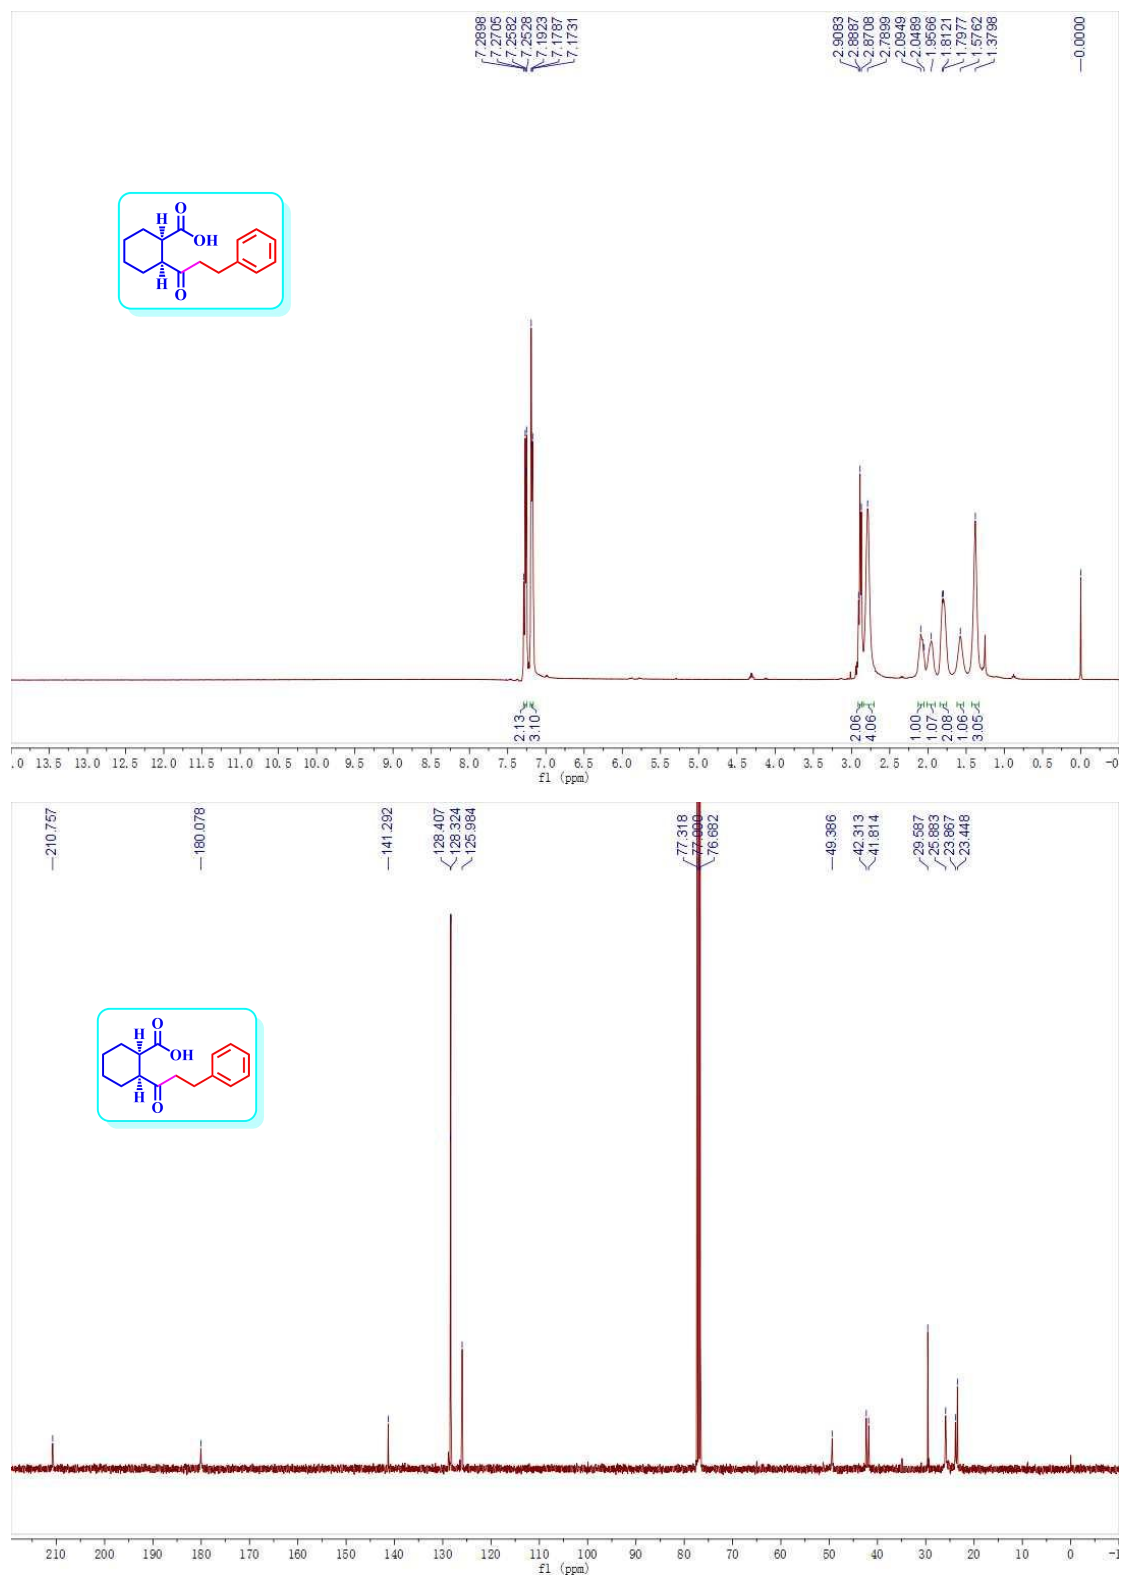

**Figure S19.** <sup>1</sup>H (400 MHz) and <sup>13</sup>C {<sup>1</sup>H} (101 MHz) NMR spectra of 3a in CDCl<sub>3</sub>

***Cis*-2-(3-(2,3-dihydrobenzofuran-6-yl)propanoyl)cyclohexane-1-carboxylic acid (3am)**

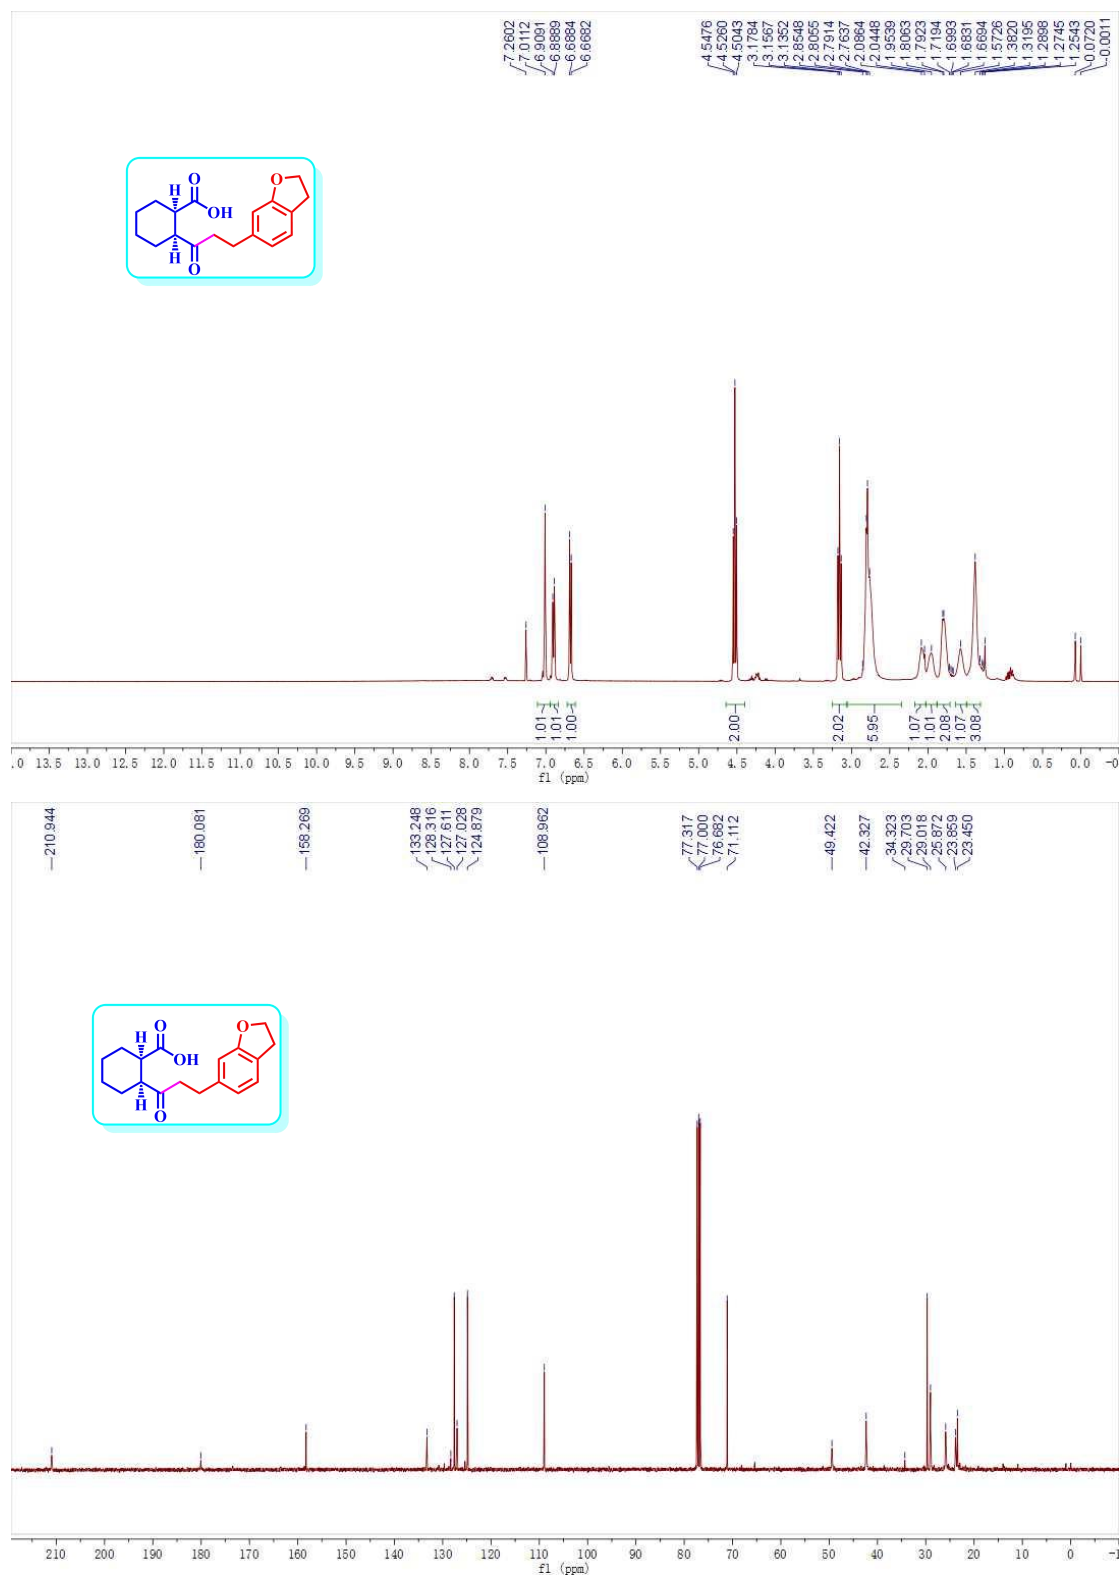

**Figure S20.  $^1\text{H}$  (400 MHz) and  $^{13}\text{C}$   $\{^1\text{H}\}$  (101 MHz) NMR spectra of 3am in  $\text{CDCl}_3$**

***Cis*-2-(3-(4-(methoxycarbonyl)phenyl)propanoyl)cyclohexane-1-carboxylic acid (3an)**

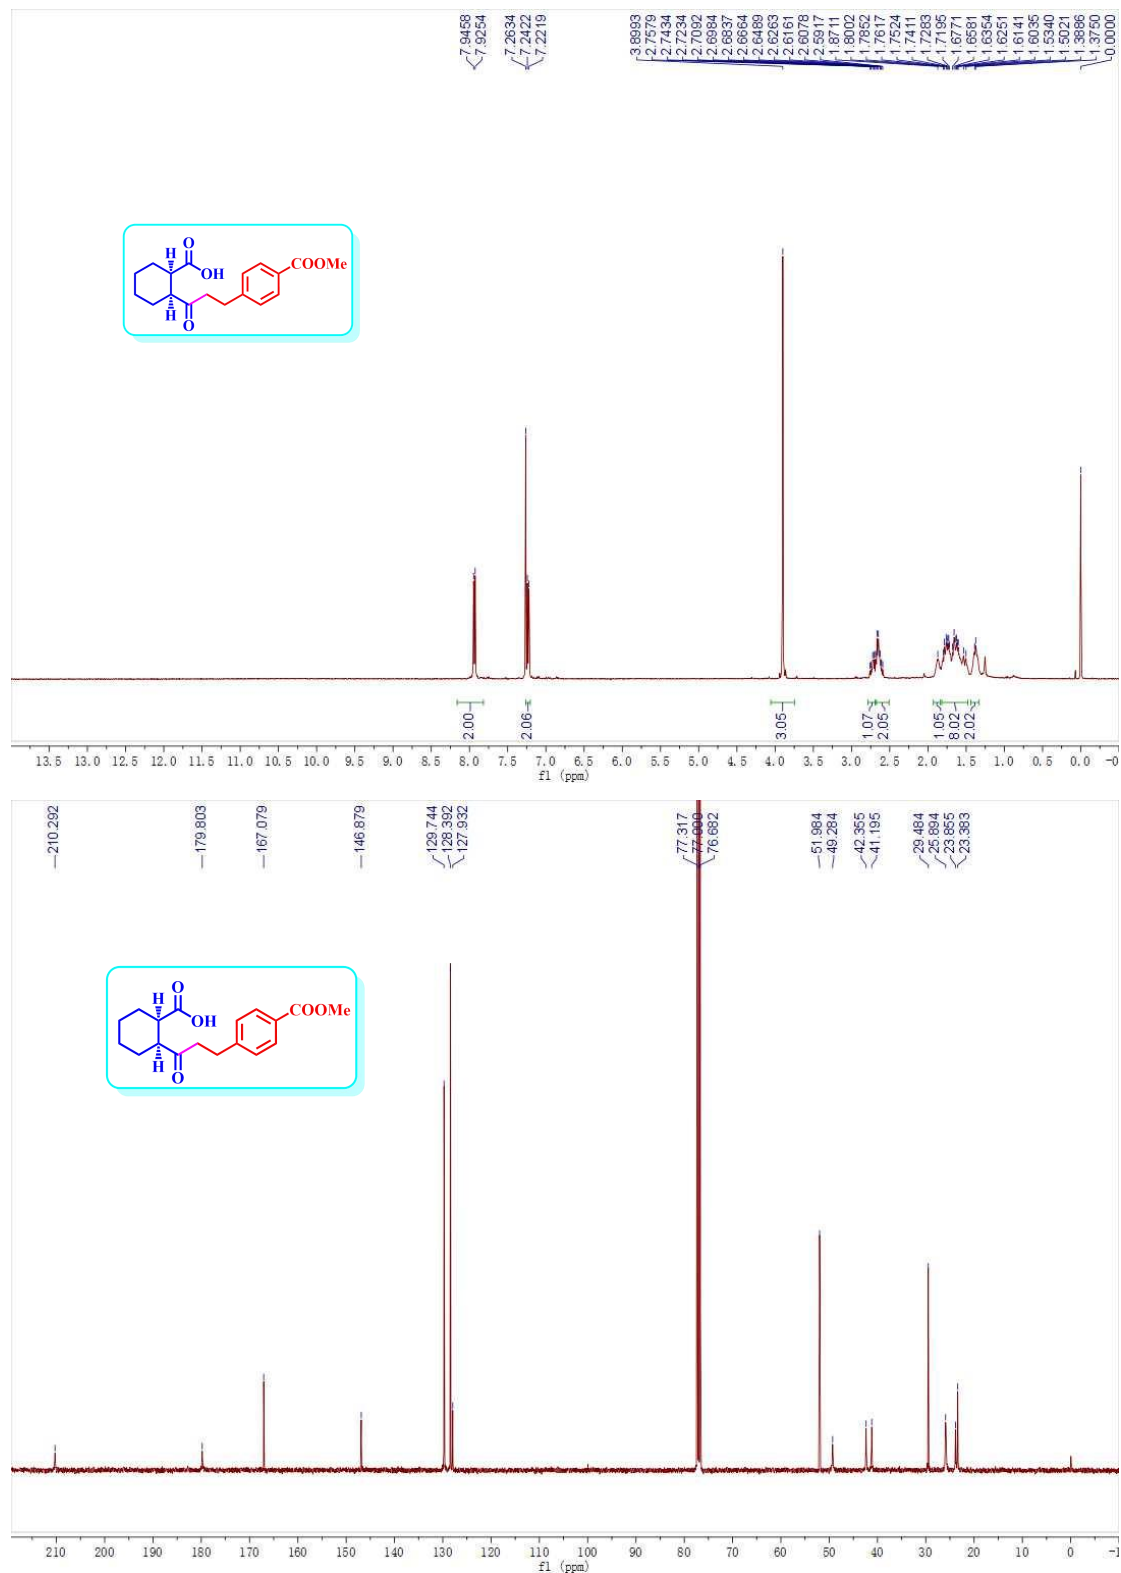

**Figure S21.**  $^1\text{H}$  (400 MHz) and  $^{13}\text{C}$   $\{^1\text{H}\}$  (101 MHz) NMR spectra of 3an in  $\text{CDCl}_3$

**Cis-2-(5-acetoxypentanyl)cyclohexane-1-carboxylic acid (3ao)**

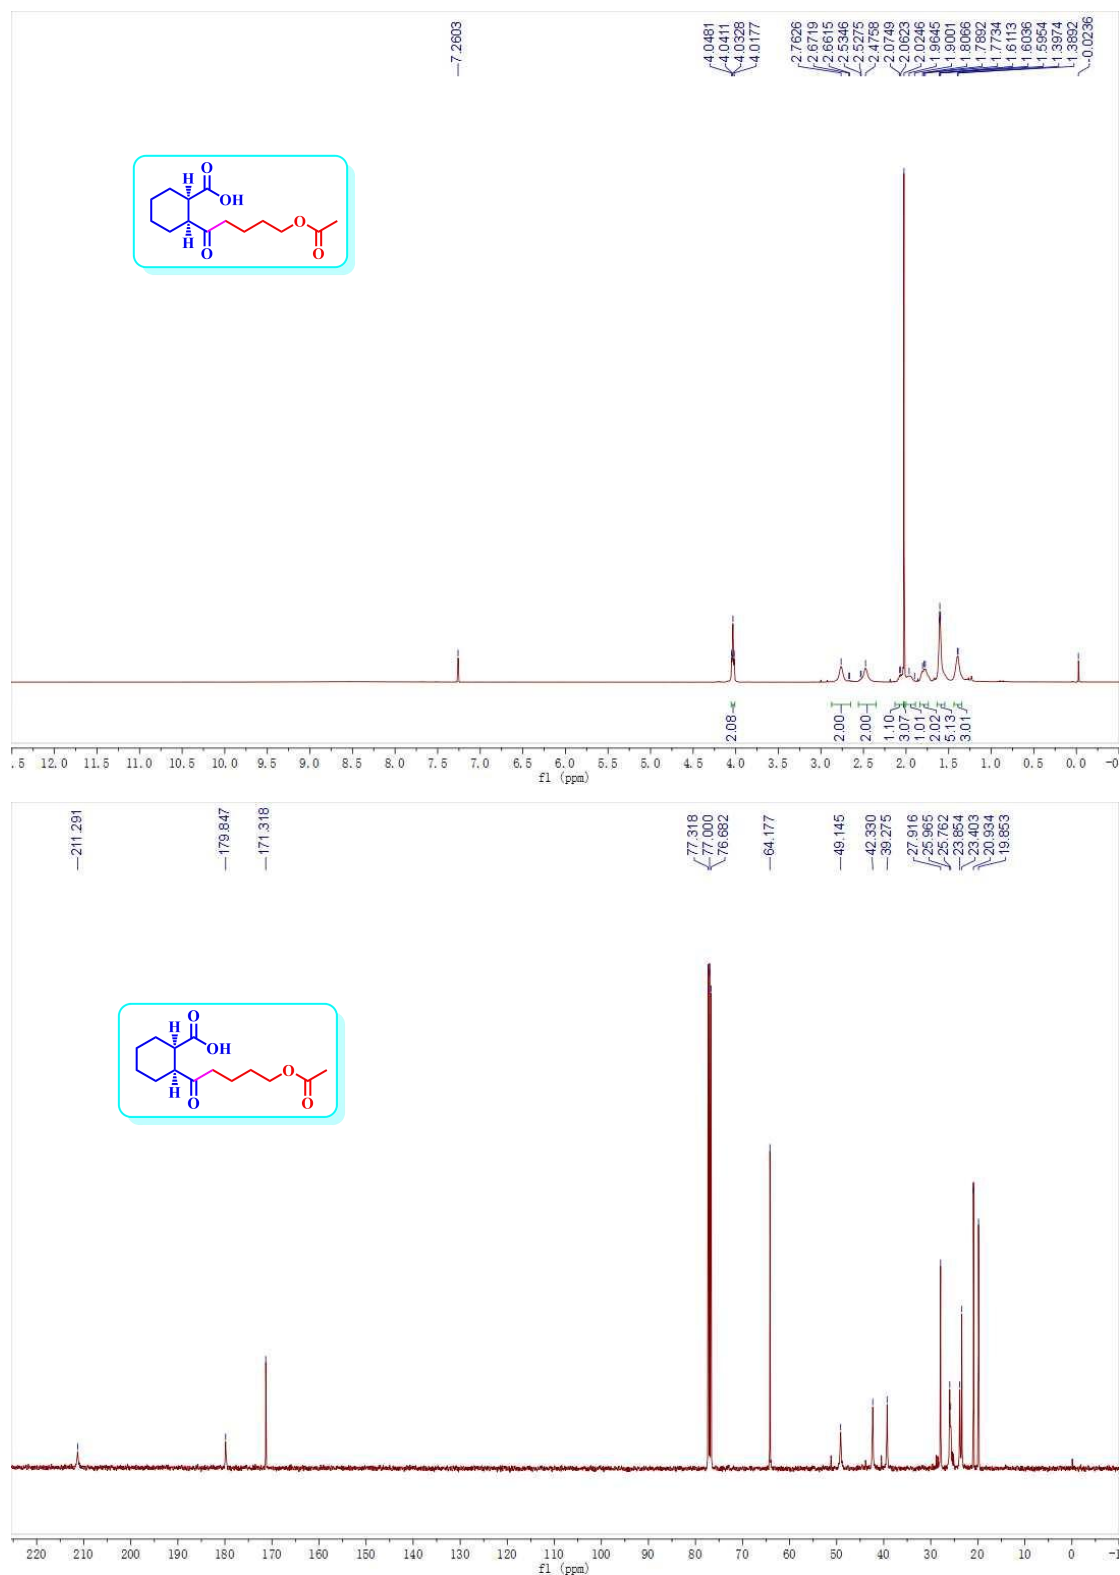

**Figure S22.  $^1\text{H}$  (400 MHz) and  $^{13}\text{C}$   $\{^1\text{H}\}$  (101 MHz) NMR spectra of 3ao in  $\text{CDCl}_3$**

***Cis*-2-(7-ethoxy-7-oxoheptanoyl)cyclohexane-1-carboxylic acid (3ap)**

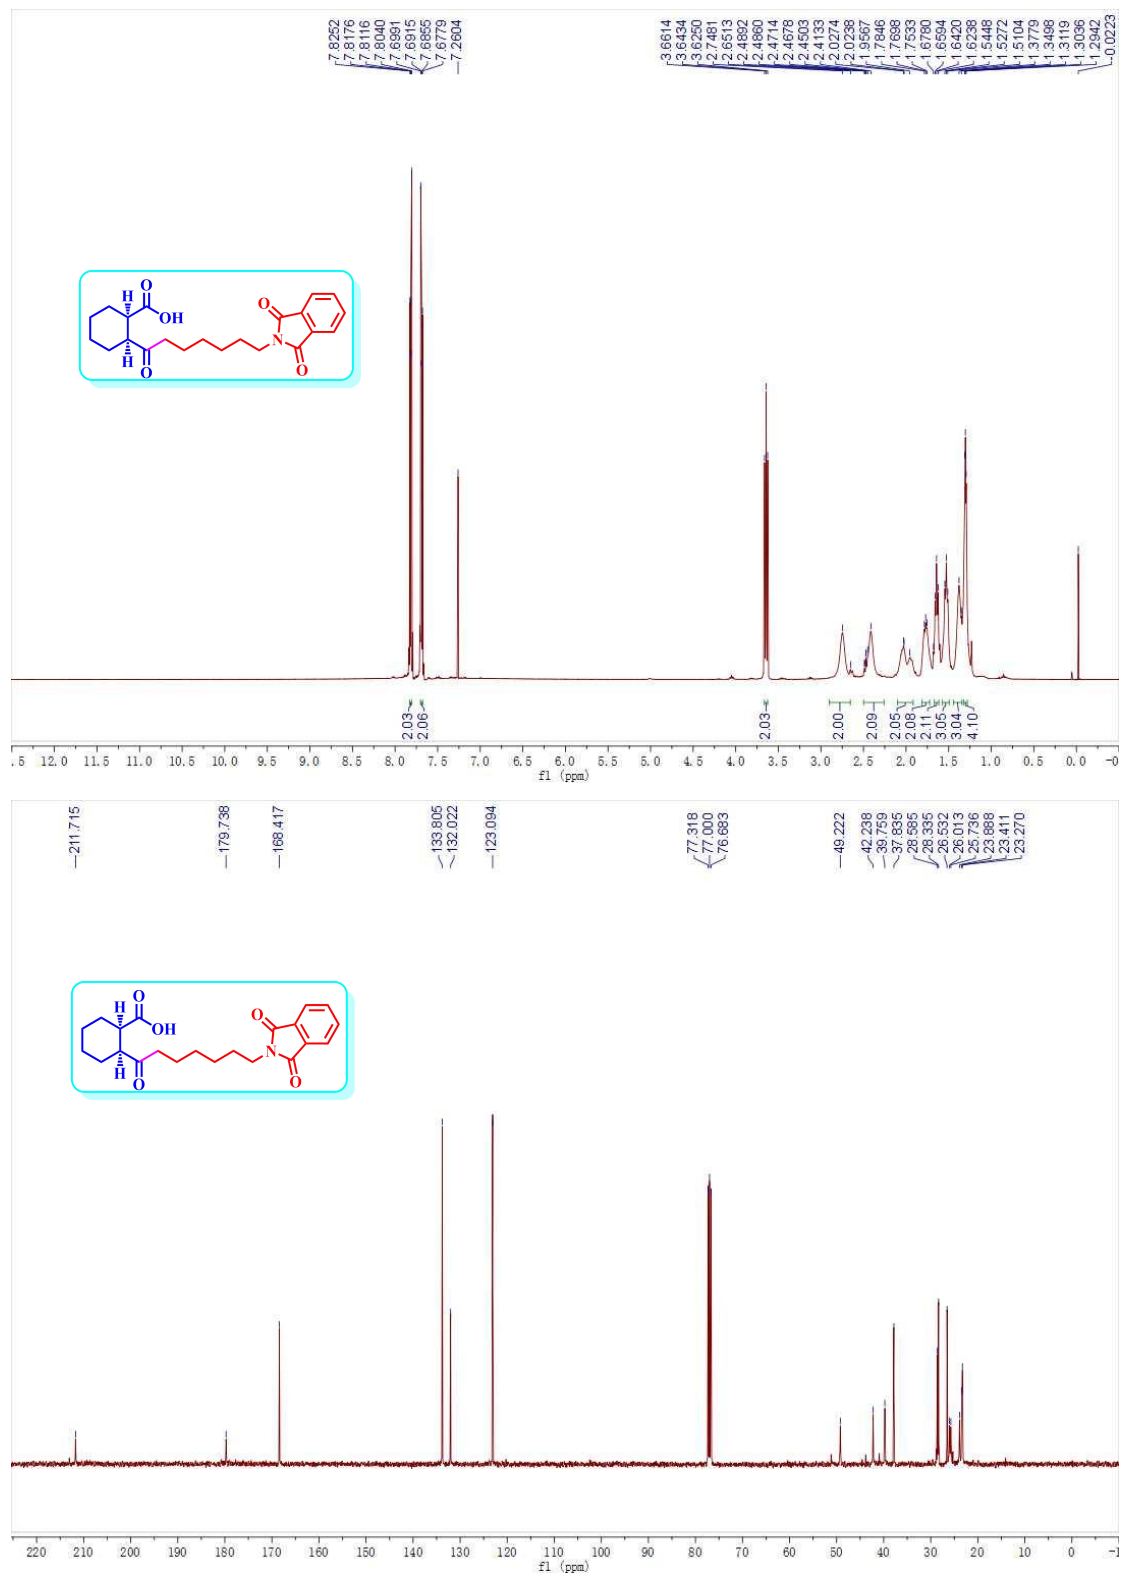

**Figure S23.** <sup>1</sup>H (400 MHz) and <sup>13</sup>C {<sup>1</sup>H} (101 MHz) NMR spectra of 3ap in CDCl<sub>3</sub>

***Cis*-2-(7-(benzyloxy)heptanoyl)cyclohexane-1-carboxylic acid (3aq)**

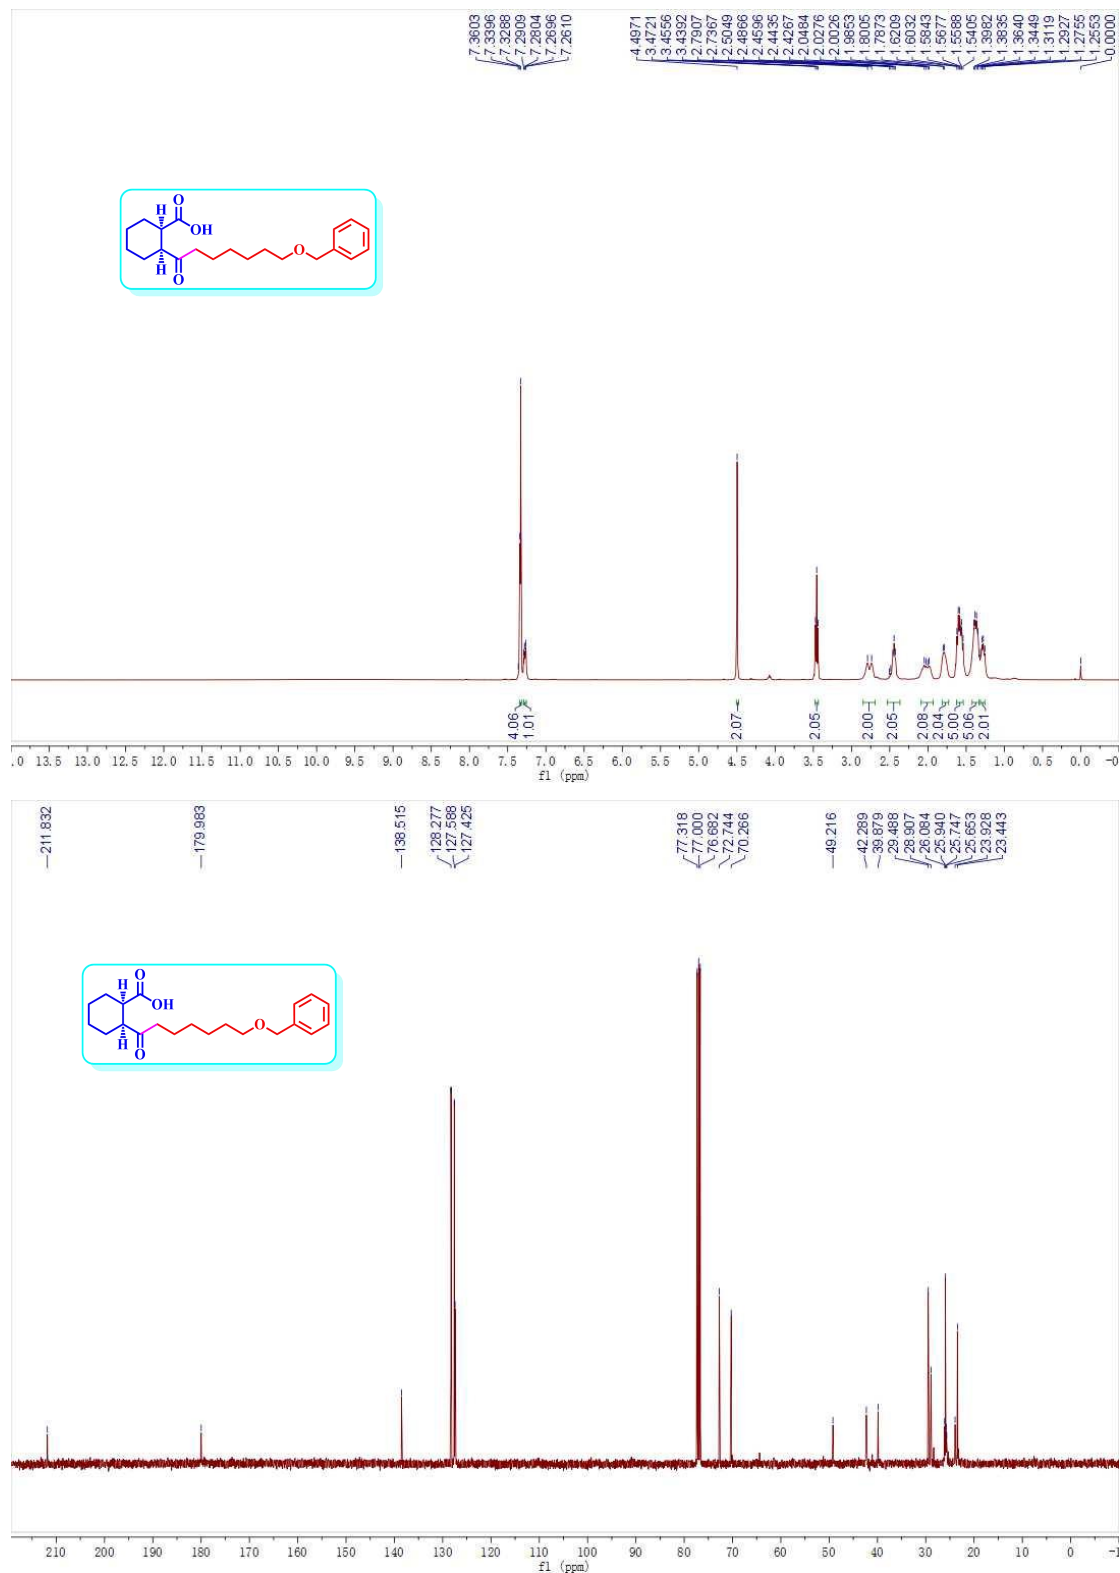

**Figure S24.** <sup>1</sup>H (400 MHz) and <sup>13</sup>C {<sup>1</sup>H} (101 MHz) NMR spectra of 3aq in CDCl<sub>3</sub>

**Cis-2-(7-ethoxy-7-oxoheptanoyl)cyclohexane-1-carboxylic acid (3ar)**

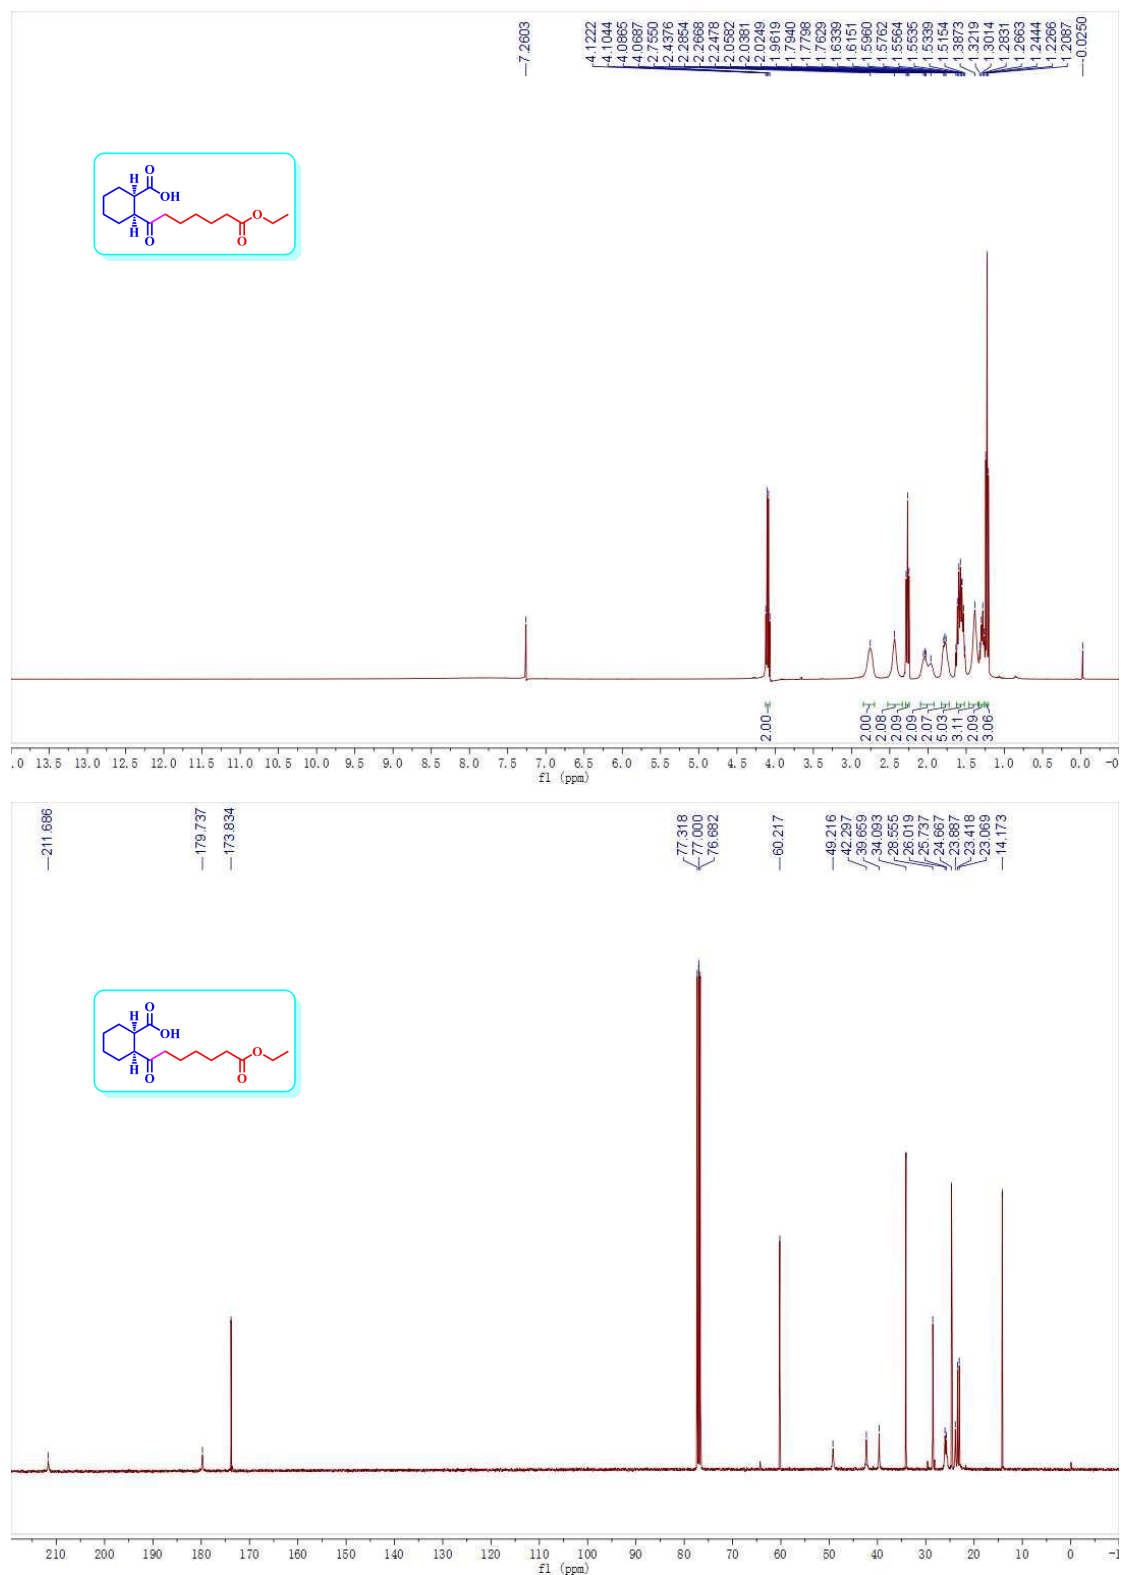

**Figure S25.  $^1\text{H}$  (400 MHz) and  $^{13}\text{C}$   $\{^1\text{H}\}$  (101 MHz) NMR spectra of 3ar in  $\text{CDCl}_3$**

**Trans-2-(cyclohexanecarbonyl)cyclohexane-1-carboxylic acid (3ba)**

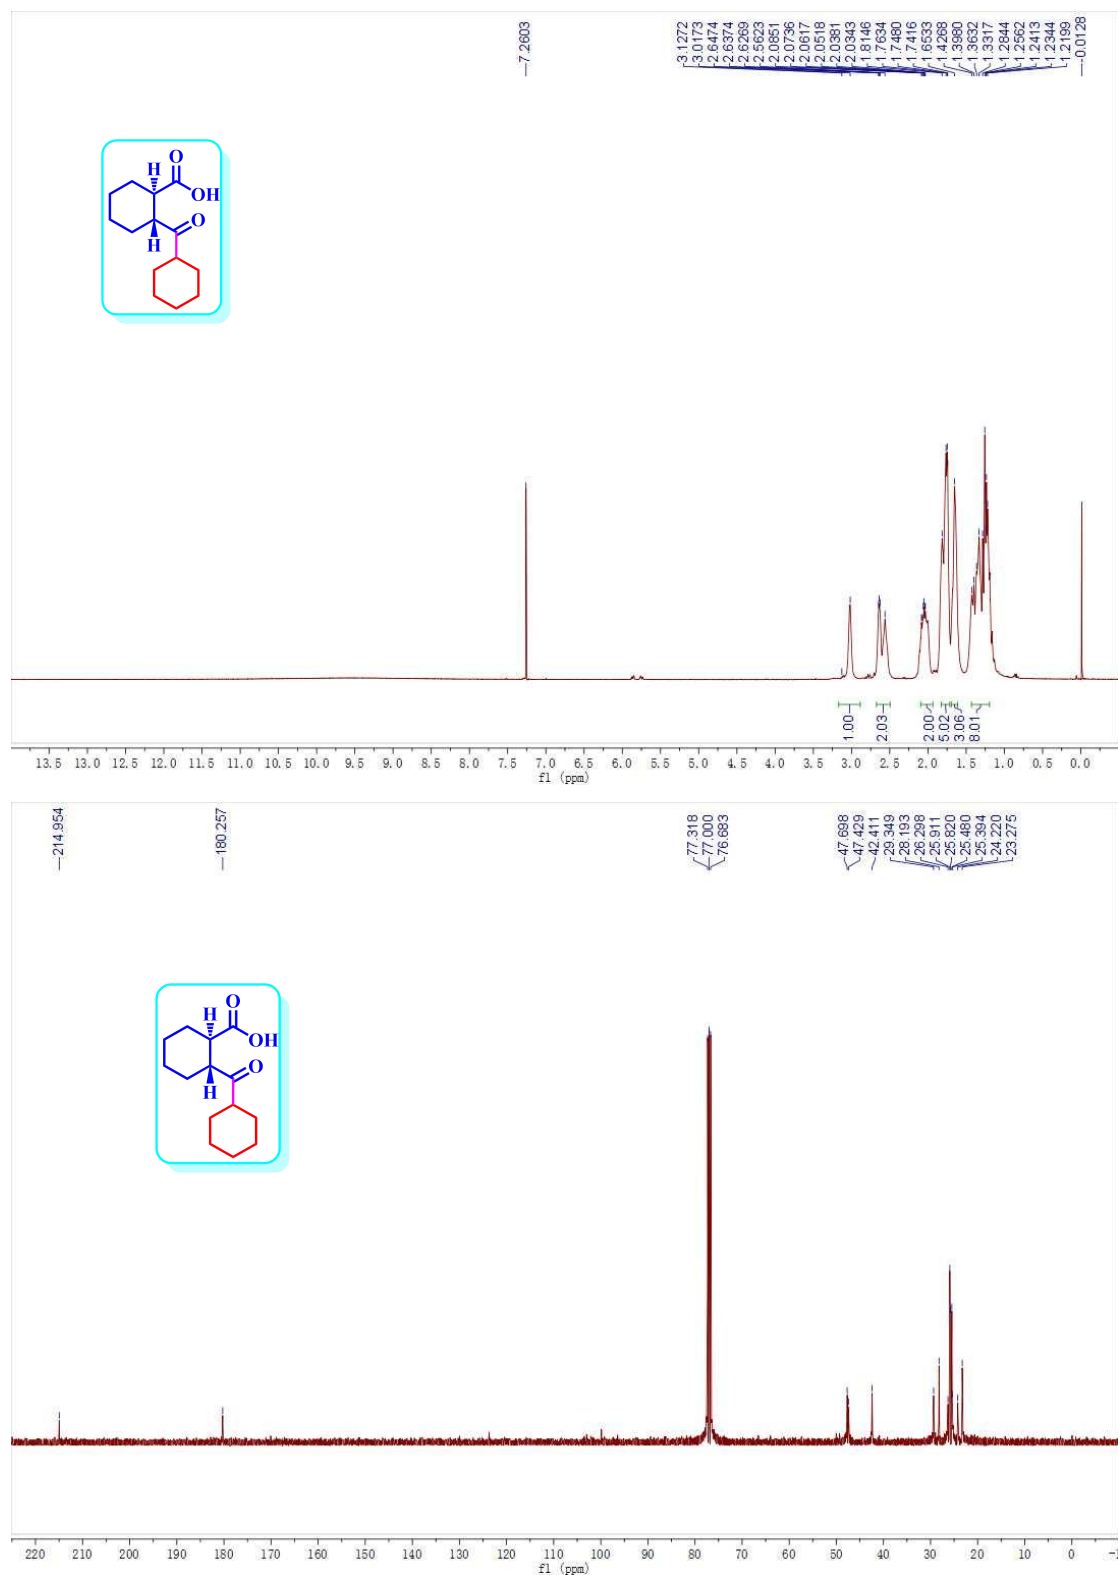

**Figure S26.  $^1\text{H}$  (400 MHz) and  $^{13}\text{C}$   $\{^1\text{H}\}$  (101 MHz) NMR spectra of 3ba in  $\text{CDCl}_3$**

**Trans-2-(7-ethoxy-7-oxoheptanoyl)cyclohexane-1-carboxylic acid  
(3br)**

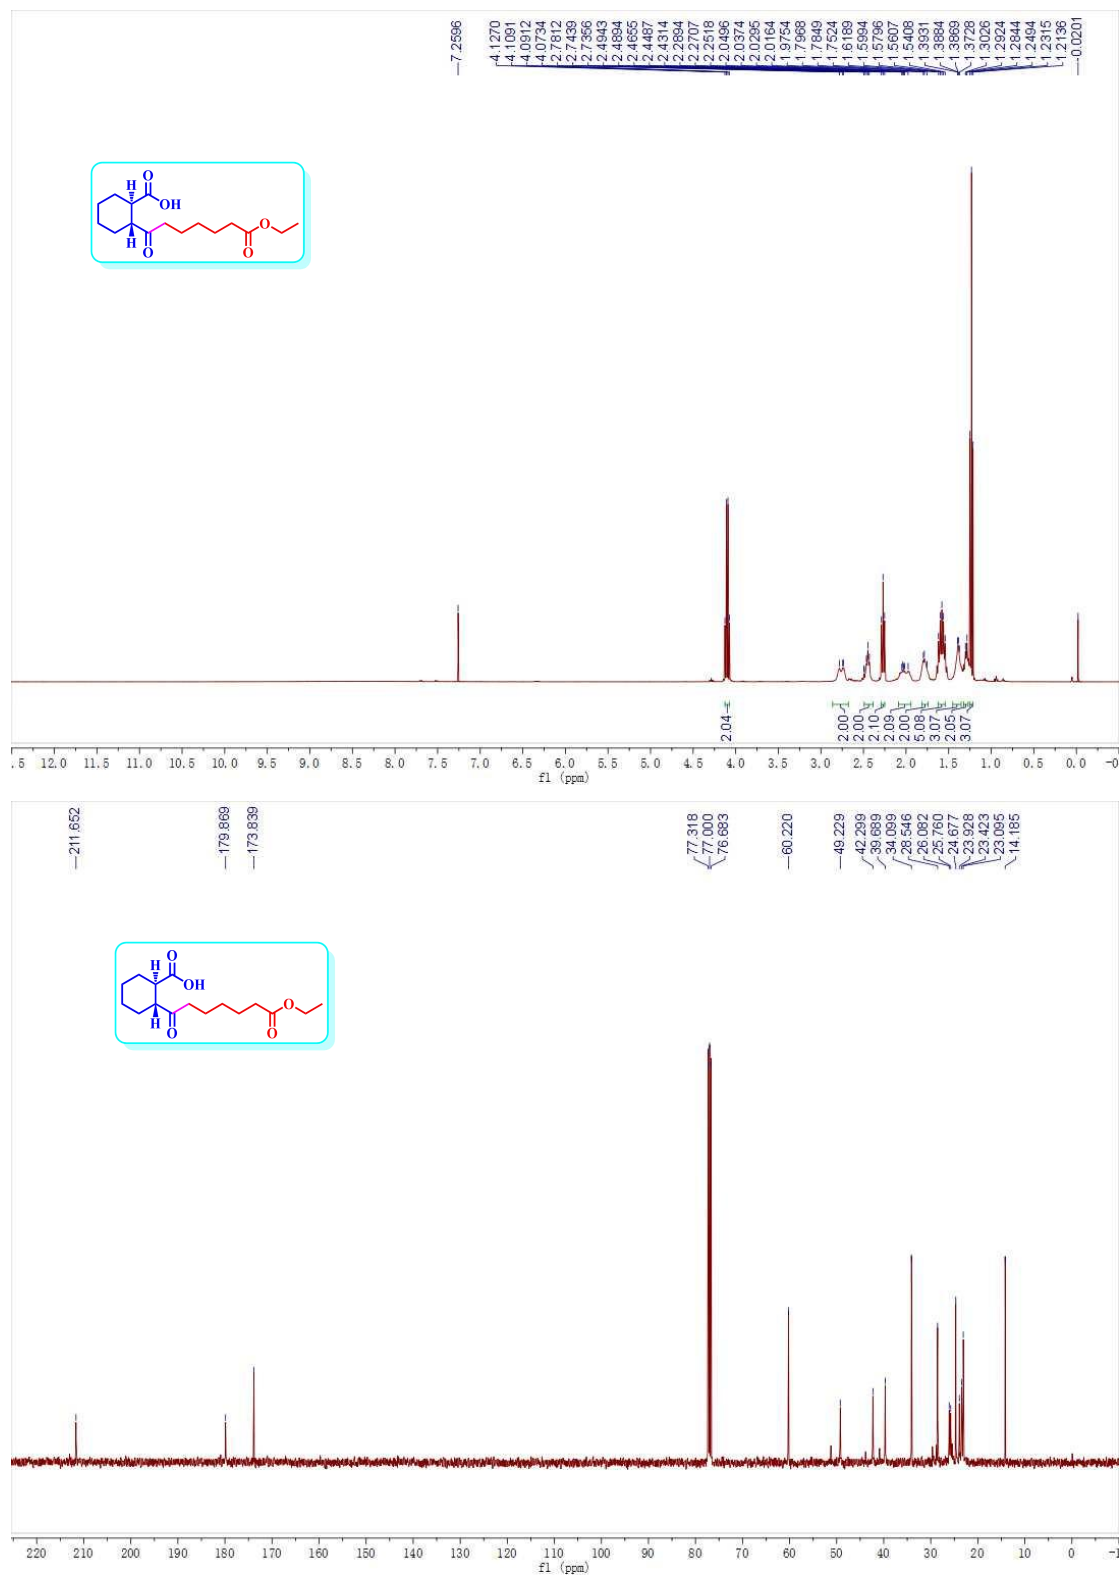

Figure S27.  $^1\text{H}$  (400 MHz) and  $^{13}\text{C}$   $\{^1\text{H}\}$  (101 MHz) NMR spectra of 3br in  $\text{CDCl}_3$

***Cis*-6-nonanoylcyclohex-3-ene-1-carboxylic acid (3cg)**

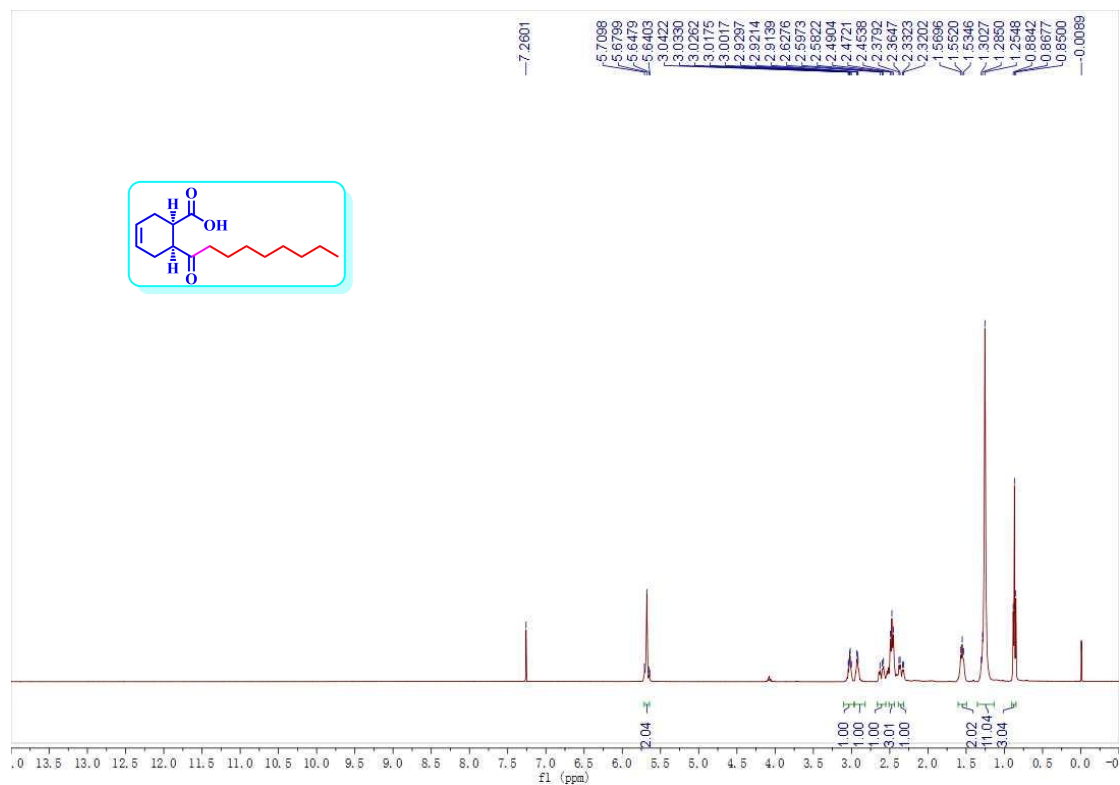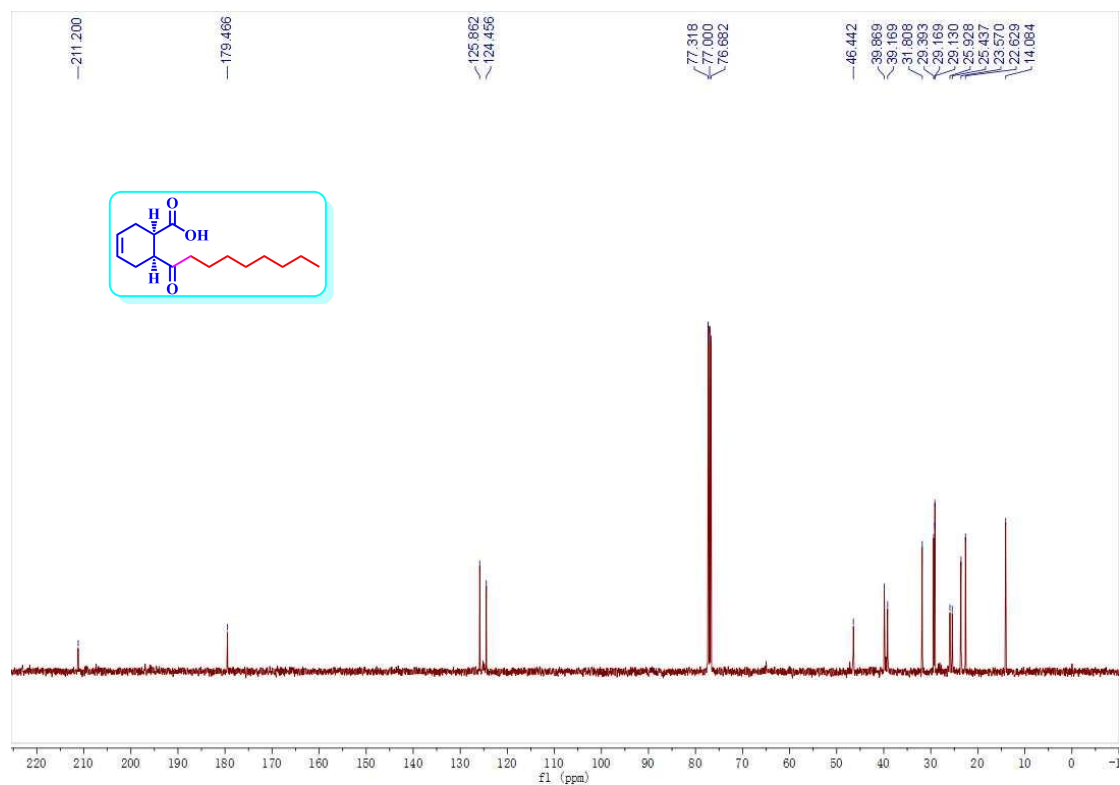

**Figure S28.** <sup>1</sup>H (400 MHz) and <sup>13</sup>C {<sup>1</sup>H} (101 MHz) NMR spectra of 3cg in CDCl<sub>3</sub>

***Cis*-6-(7-(benzyloxy)heptanoyl)cyclohex-3-ene-1-carboxylic acid (3cq)**

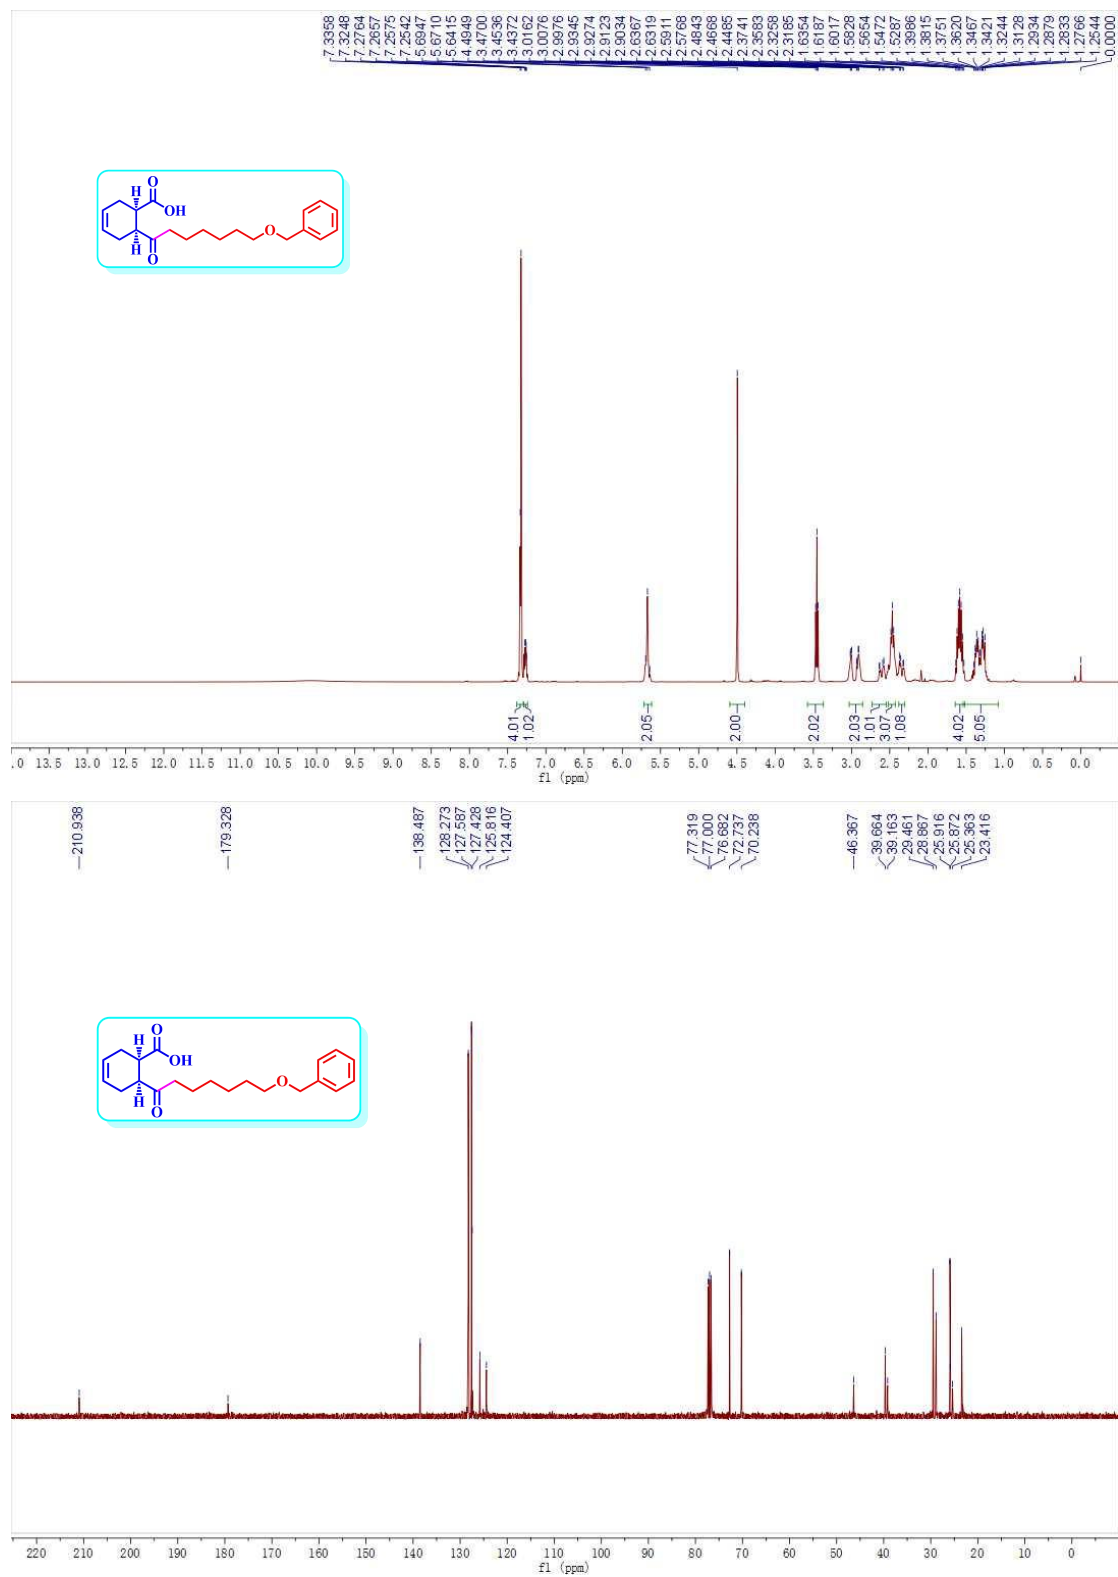

**Figure S29.** <sup>1</sup>H (400 MHz) and <sup>13</sup>C {<sup>1</sup>H} (101 MHz) NMR spectra of 3cq in CDCl<sub>3</sub>

***Cis*-6-(cyclohexanecarbonyl)-3,4-dimethylcyclohex-3-ene-1-carboxylic acid (3da)**

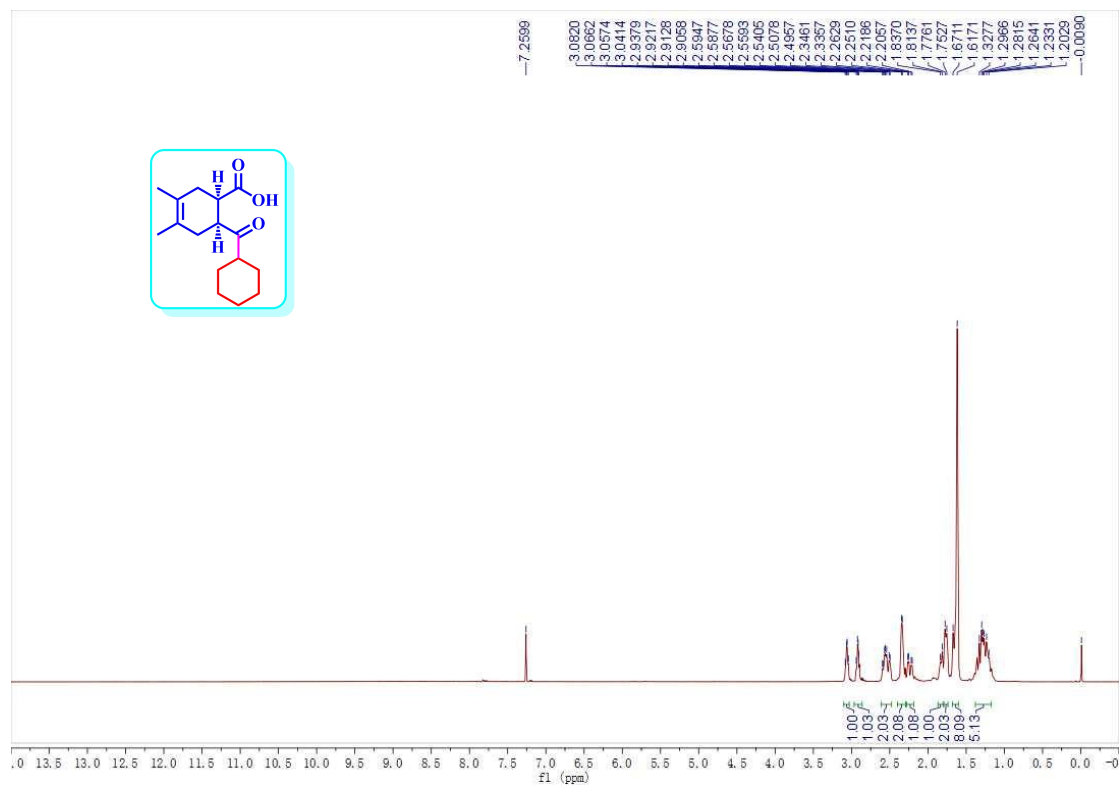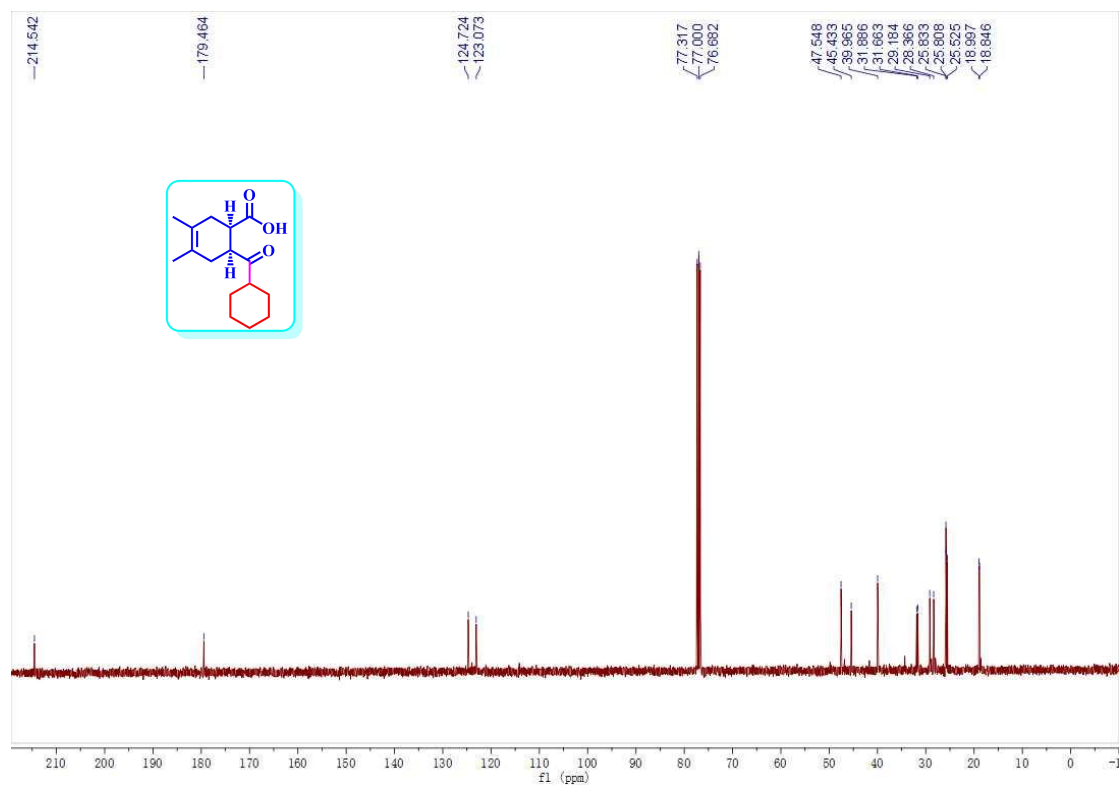

**Figure S30.**  $^1\text{H}$  (400 MHz) and  $^{13}\text{C}$   $\{^1\text{H}\}$  (101 MHz) NMR spectra of 3da in  $\text{CDCl}_3$

**Cis-2-(cyclohexanecarbonyl)cyclopentane-1-carboxylic acid (3ea)**

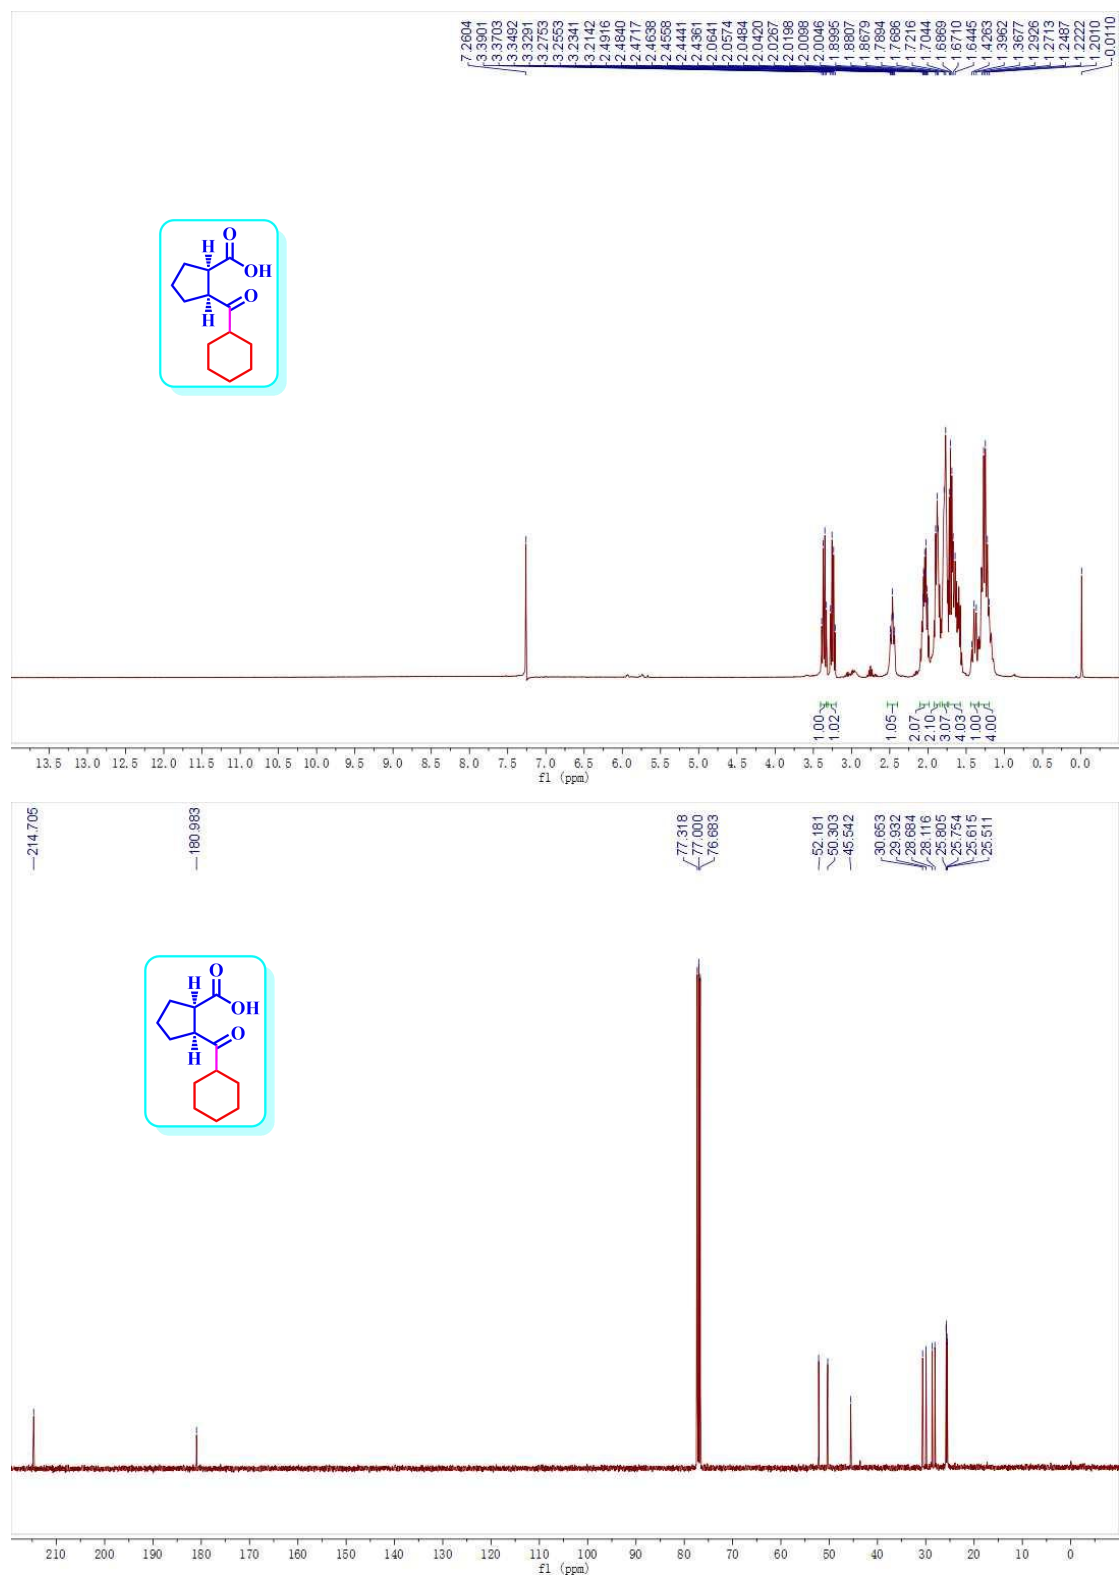

**Figure S31.  $^1\text{H}$  (400 MHz) and  $^{13}\text{C}$  { $^1\text{H}$ } (101 MHz) NMR spectra of 3ea in  $\text{CDCl}_3$**

***Cis*-2-(7-ethoxy-7-oxoheptanoyl)cyclopentane-1-carboxylic acid (3er)**

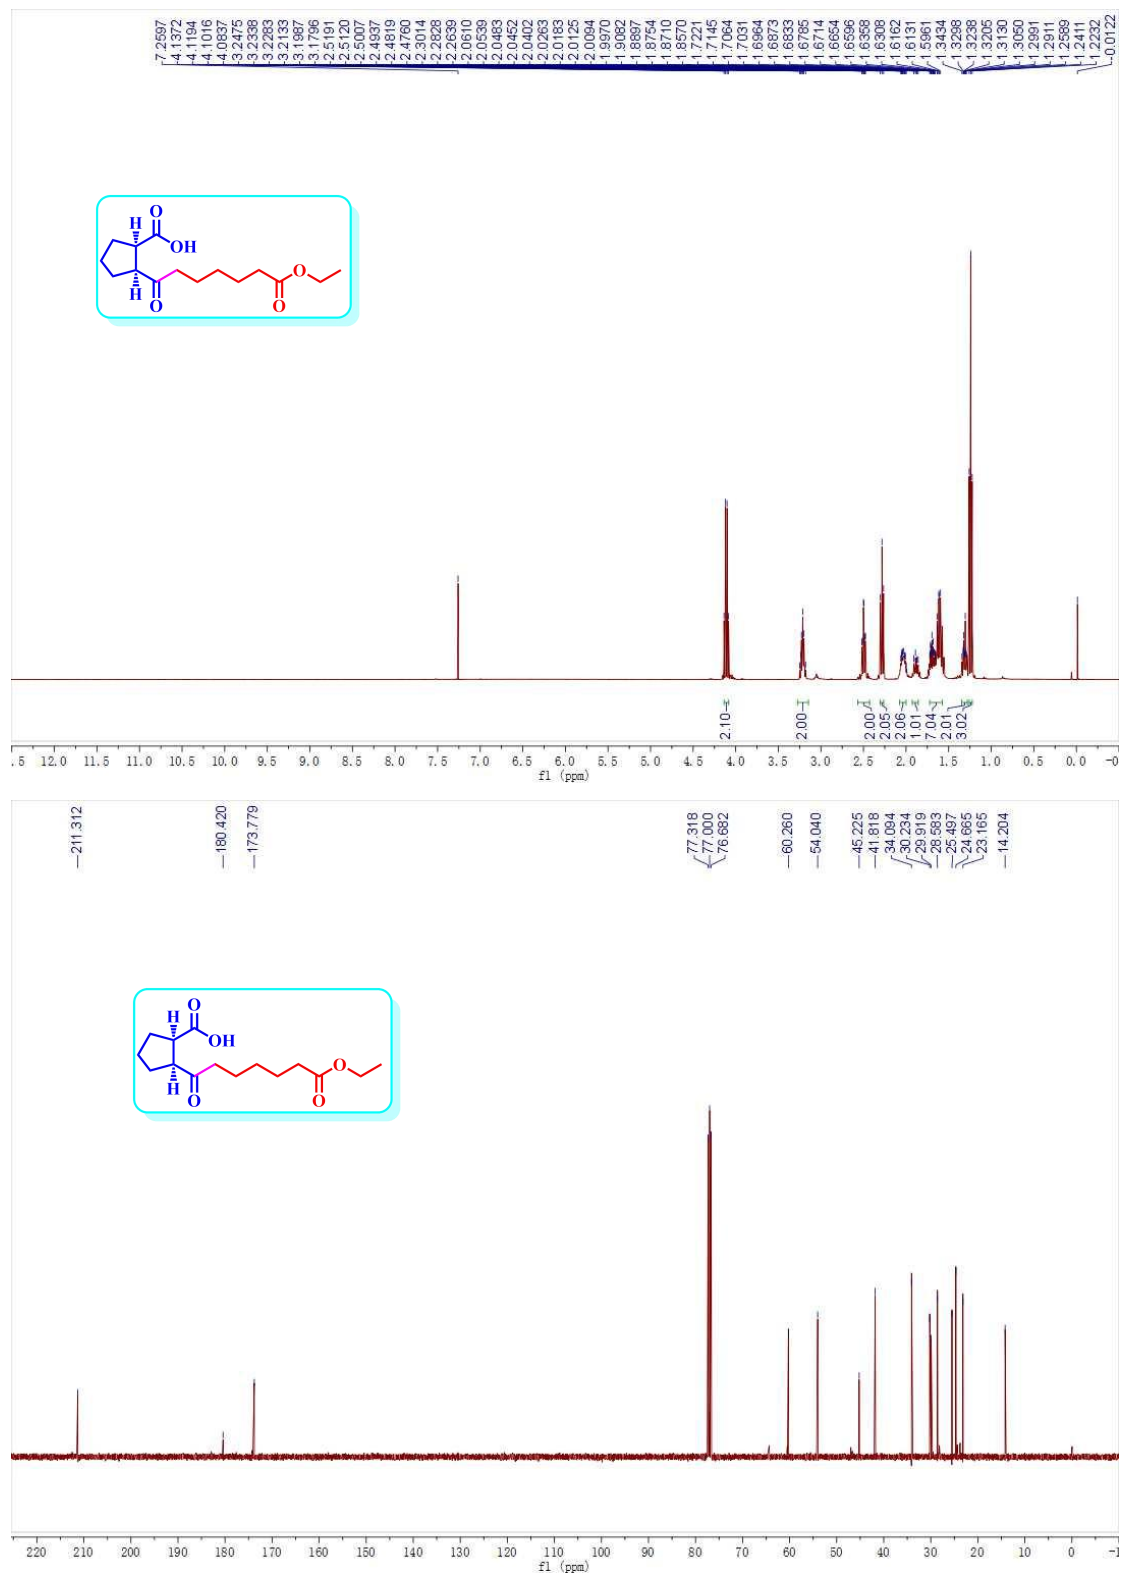

**Figure S32. <sup>1</sup>H (400 MHz) and <sup>13</sup>C {<sup>1</sup>H} (101 MHz) NMR spectra of 3er in CDCl<sub>3</sub>**

***Cis*-3-(7-(benzyloxy)heptanoyl)bicyclo[2.2.1]heptane-2-carboxylic acid (3fq)**

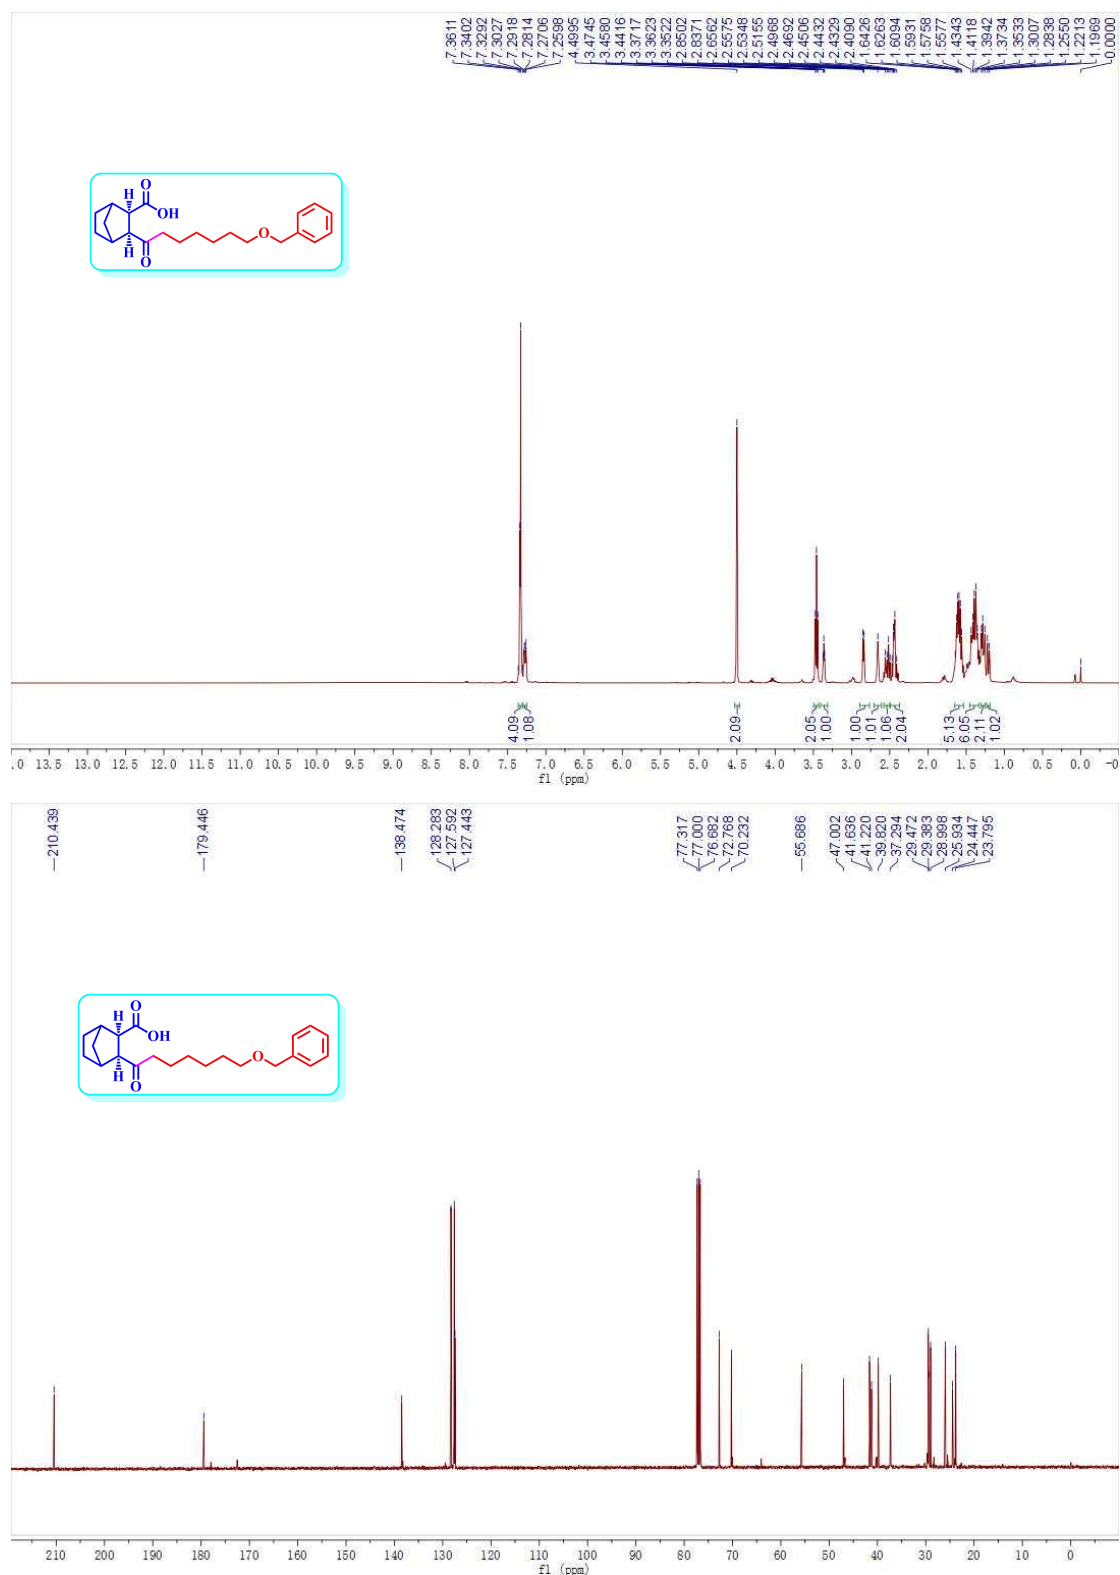

**Figure S33.** <sup>1</sup>H (400 MHz) and <sup>13</sup>C {<sup>1</sup>H} (101 MHz) NMR spectra of 3fq in CDCl<sub>3</sub>

***Cis*-3-(7-ethoxy-7-oxoheptanoyl)bicyclo[2.2.1]heptane-2-carboxylic acid (3fr)**

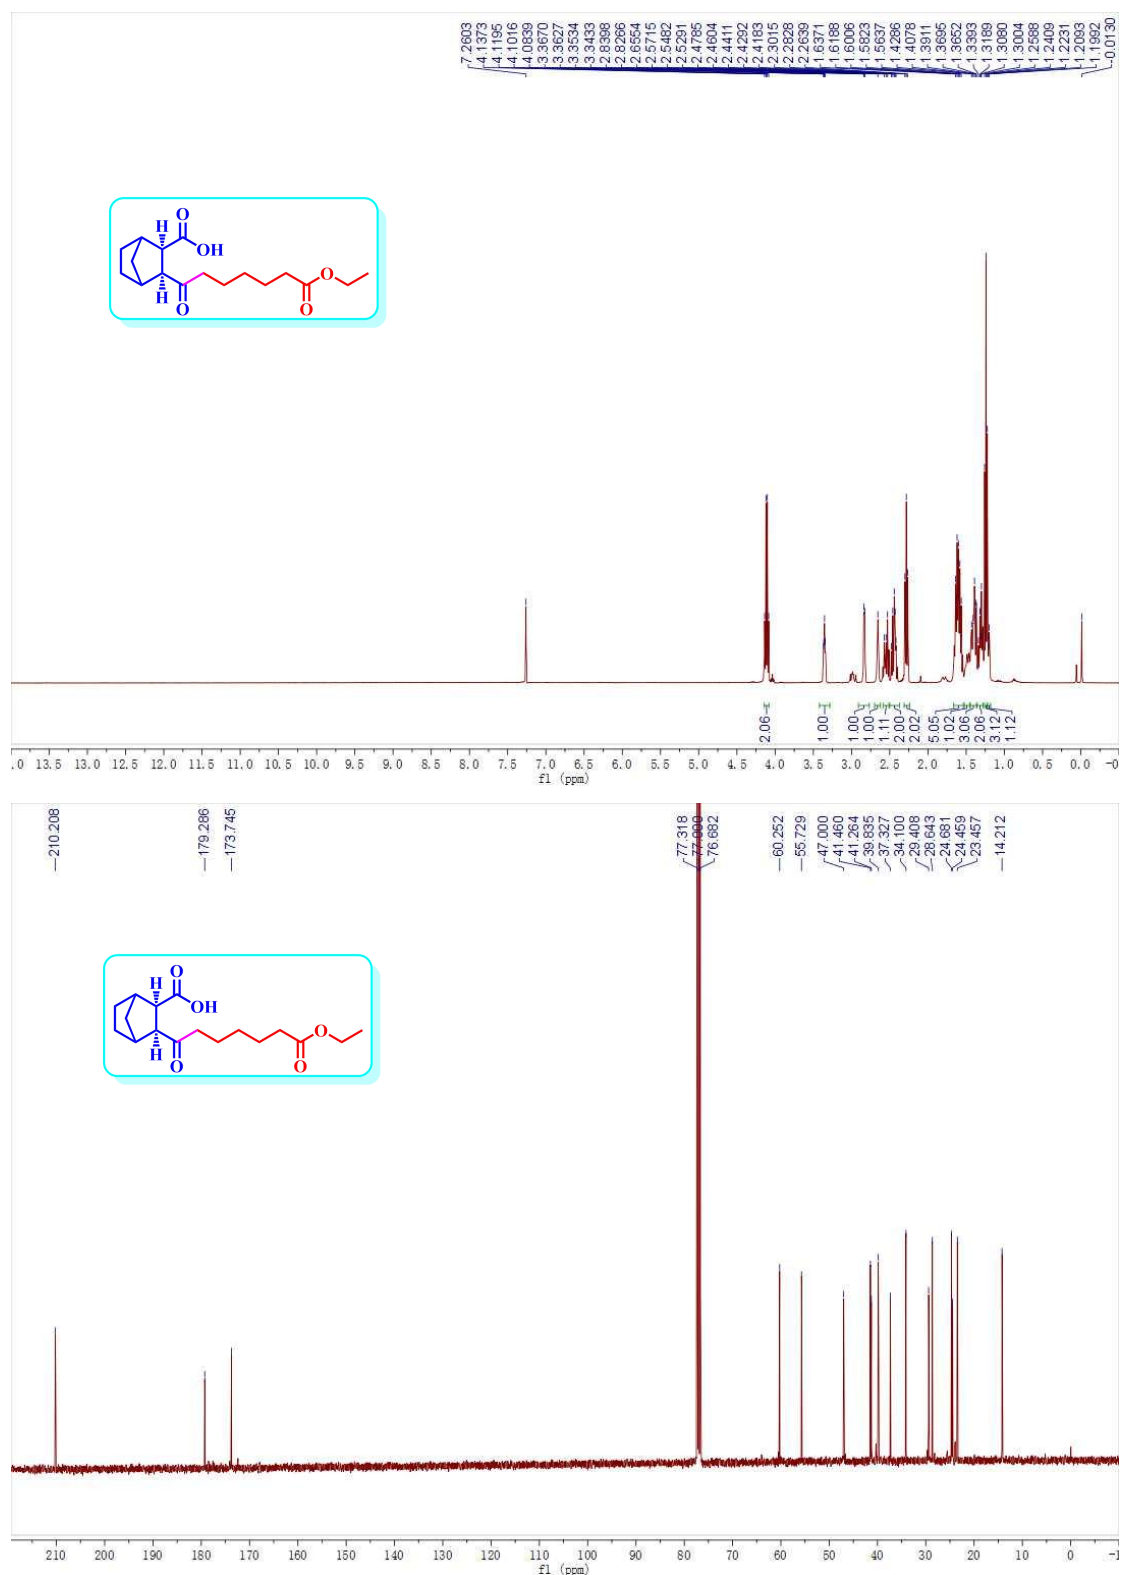

**Figure S34.** <sup>1</sup>H (400 MHz) and <sup>13</sup>C {<sup>1</sup>H} (101 MHz) NMR spectra of 3fr in CDCl<sub>3</sub>

***Cis*-3-(7-(benzyloxy)heptanoyl)bicyclo[2.2.1]hept-5-ene-2-carboxylic acid (3gq)**

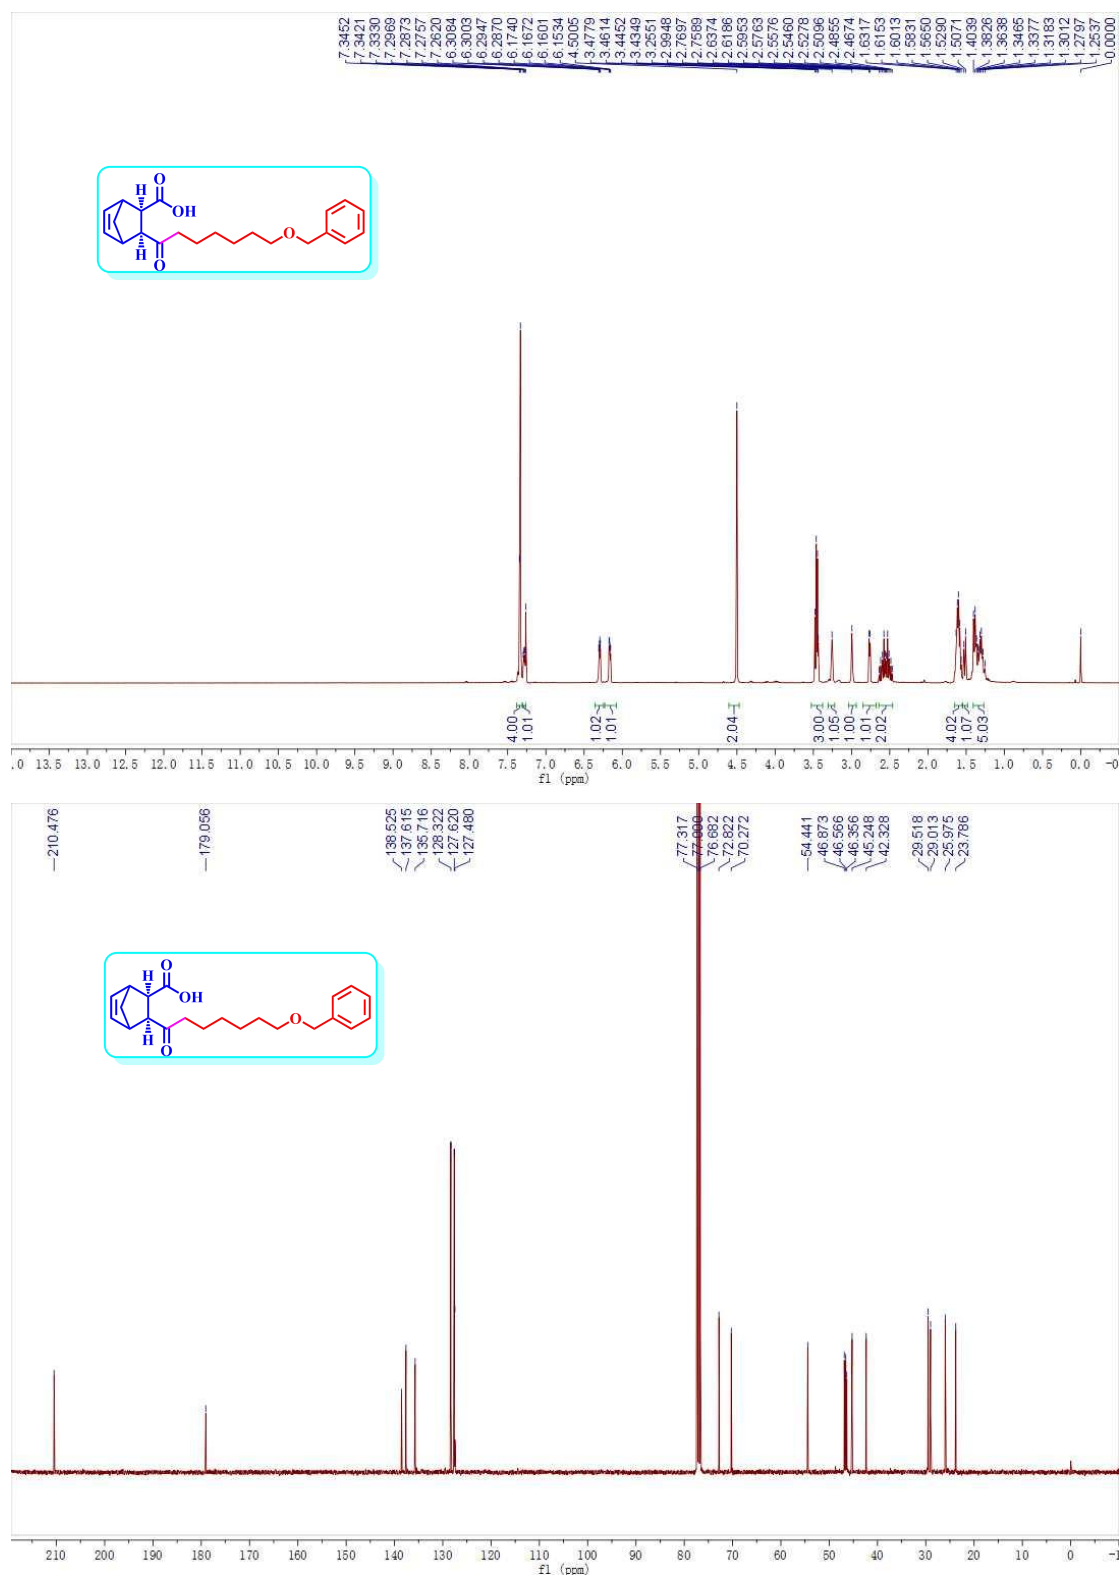

Figure S35. <sup>1</sup>H (400 MHz) and <sup>13</sup>C {<sup>1</sup>H} (101 MHz) NMR spectra of 3gq in CDCl<sub>3</sub>

***Cis*-3-(7-ethoxy-7-oxoheptanoyl)bicyclo[2.2.1]hept-5-ene-2-carboxylic acid (3gr)**

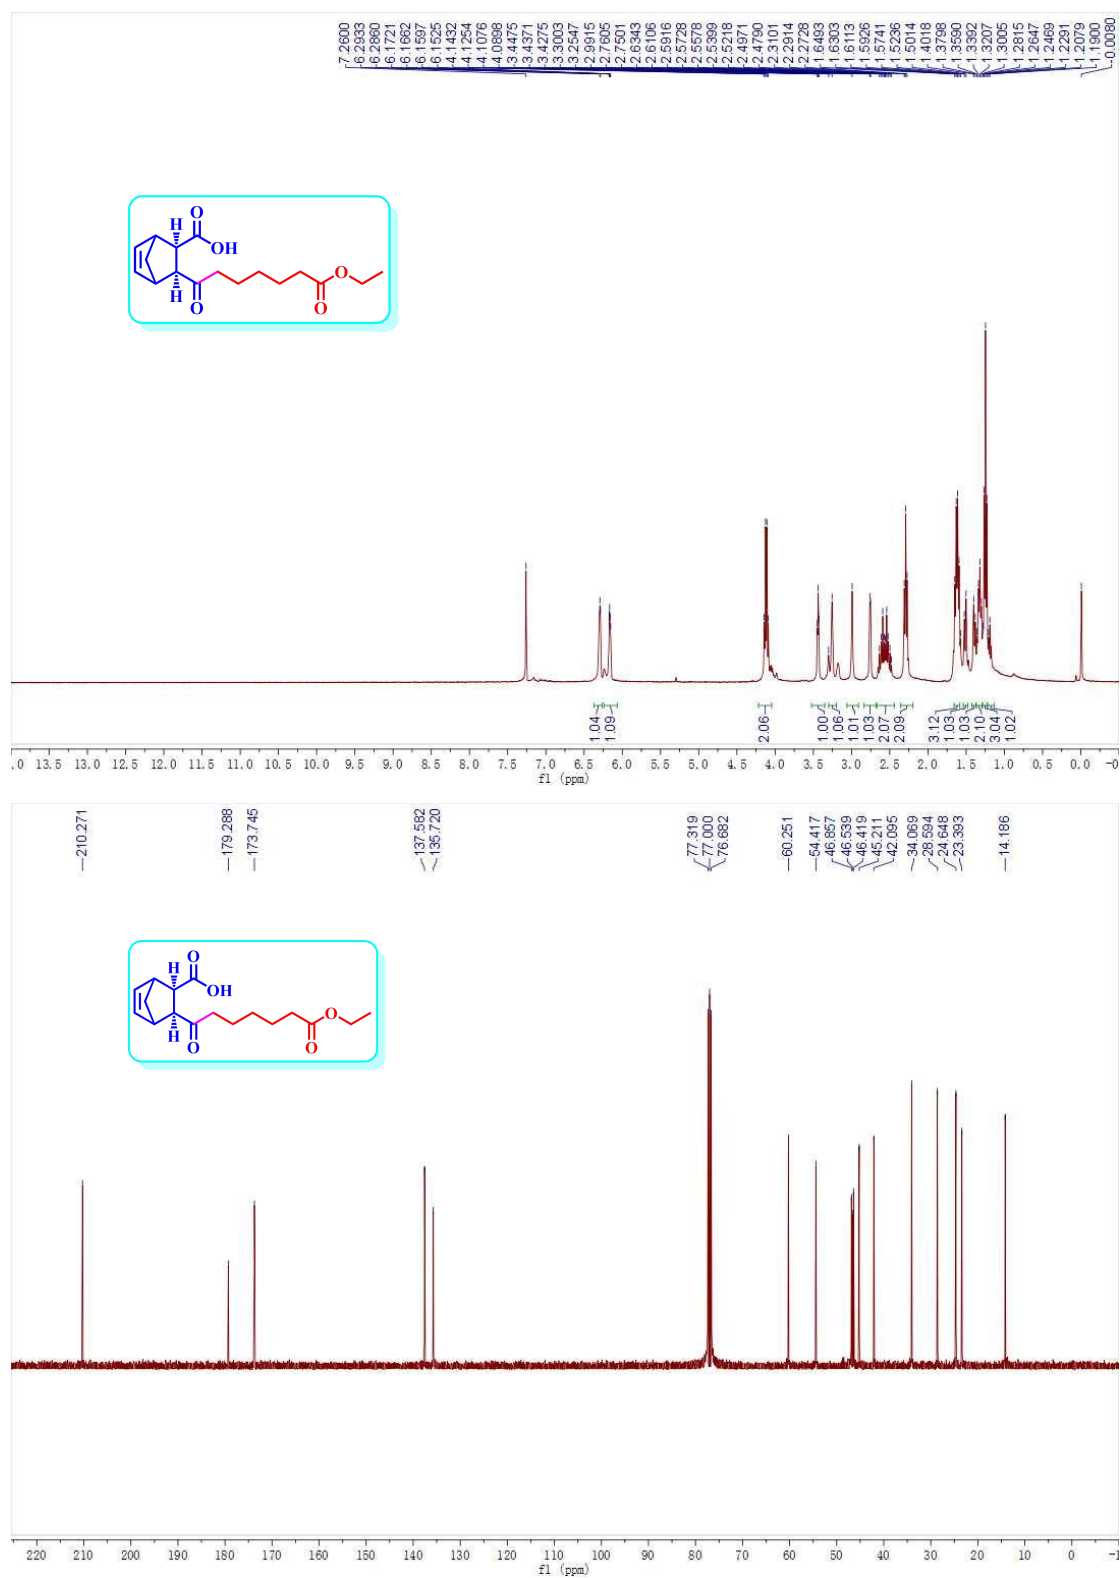

**Figure S36. <sup>1</sup>H (400 MHz) and <sup>13</sup>C {<sup>1</sup>H} (101 MHz) NMR spectra of 3gr in CDCl<sub>3</sub>**

**Cis-2-butylcyclohexane-1-carboxylic acid (4aa)**

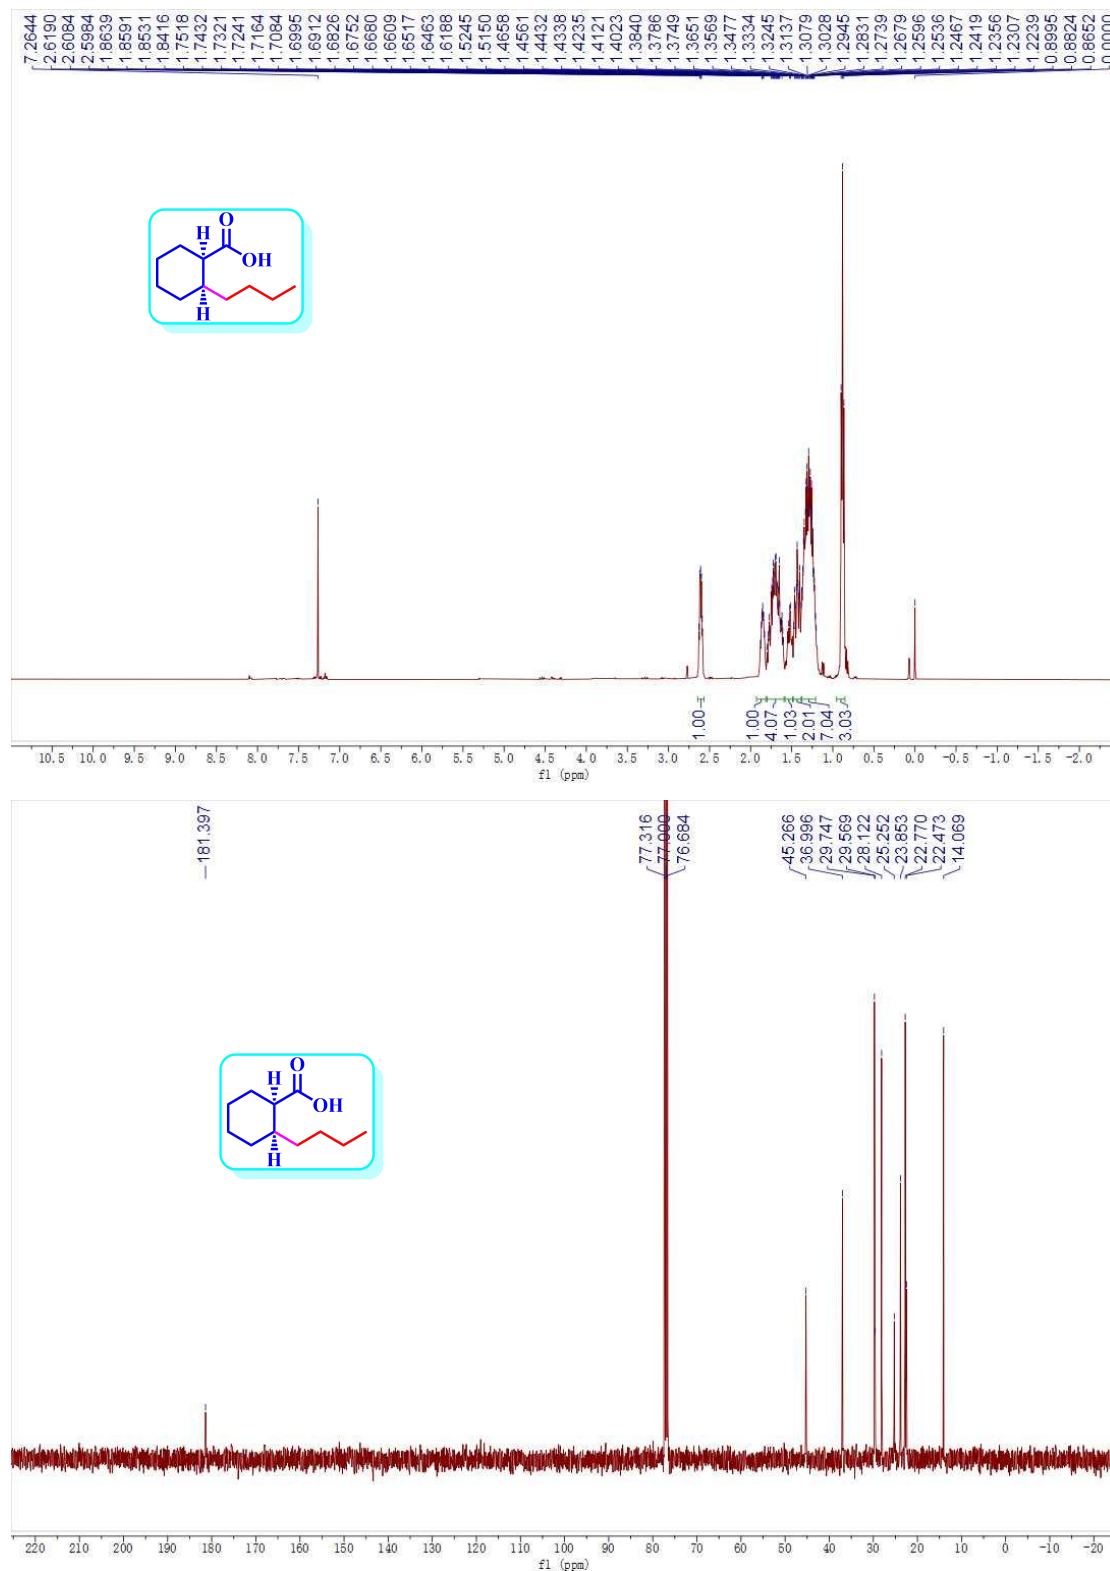

**Figure S37. <sup>1</sup>H (400 MHz) and <sup>13</sup>C {<sup>1</sup>H} (101 MHz) NMR spectra of 4aa in CDCl<sub>3</sub>**

**Cis-2-pentylcyclohexane-1-carboxylic acid (4ab)**

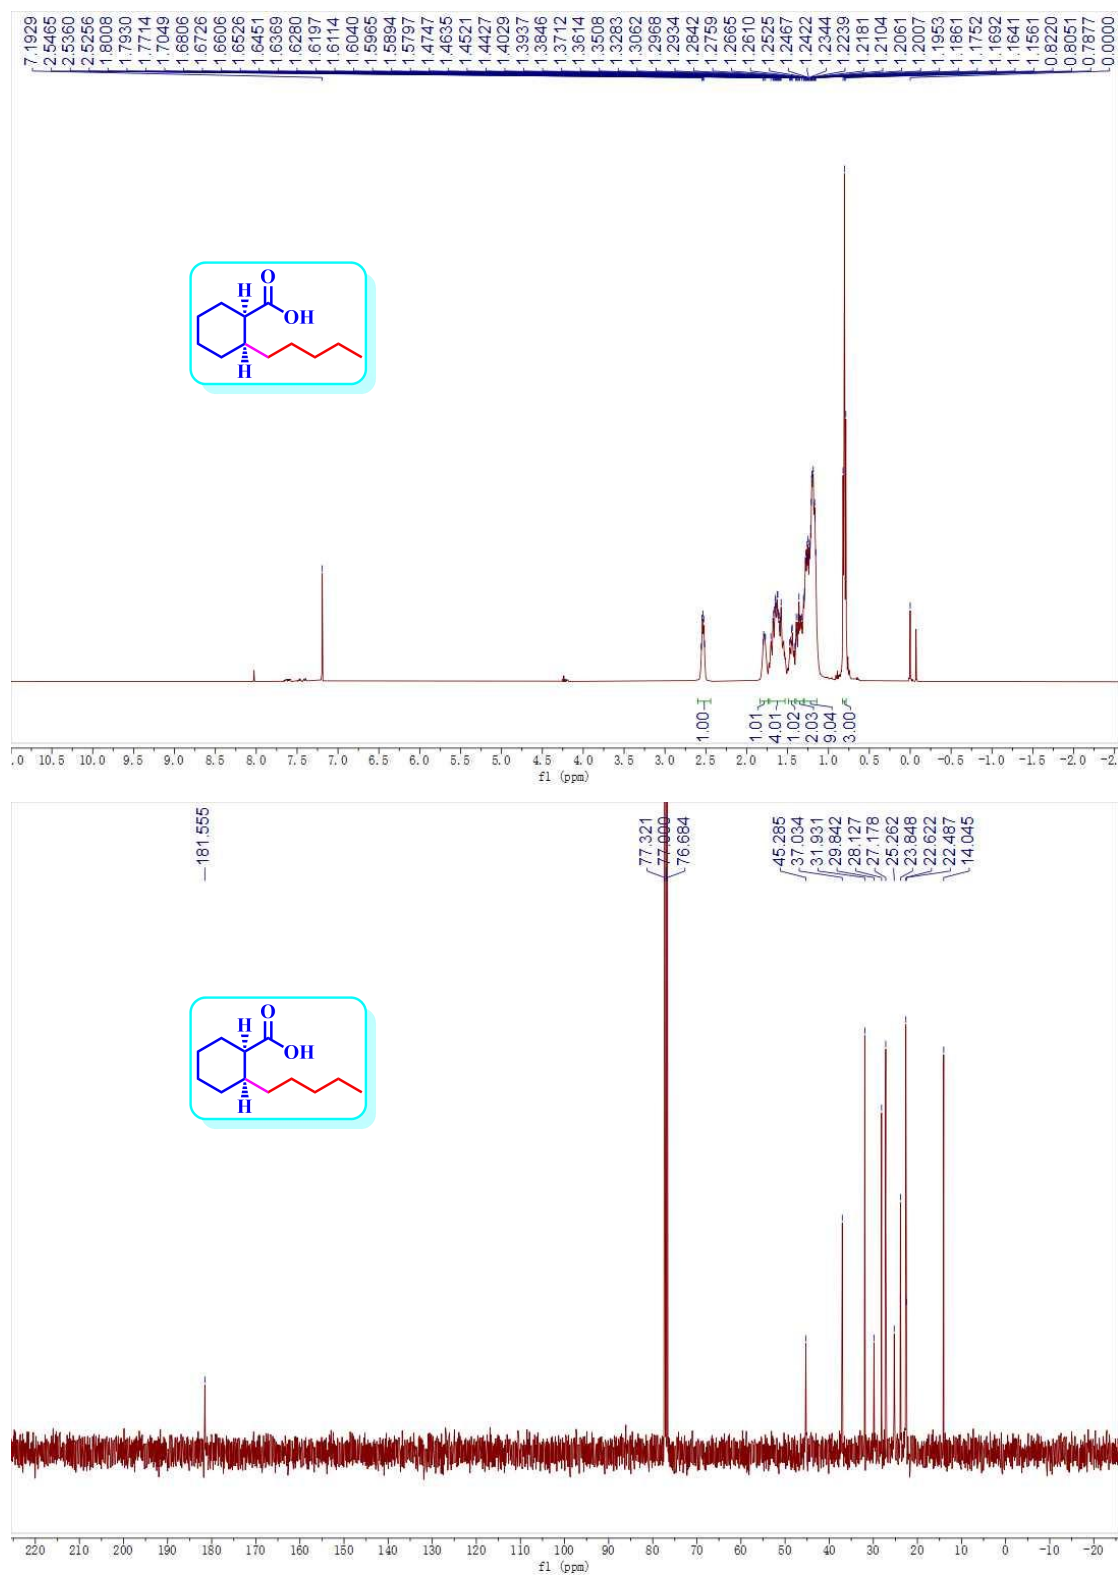

**Figure S38. <sup>1</sup>H (400 MHz) and <sup>13</sup>C {<sup>1</sup>H} (101 MHz) NMR spectra of 4ab in CDCl<sub>3</sub>**

**Cis-2-hexylcyclohexane-1-carboxylic acid (4ac)**

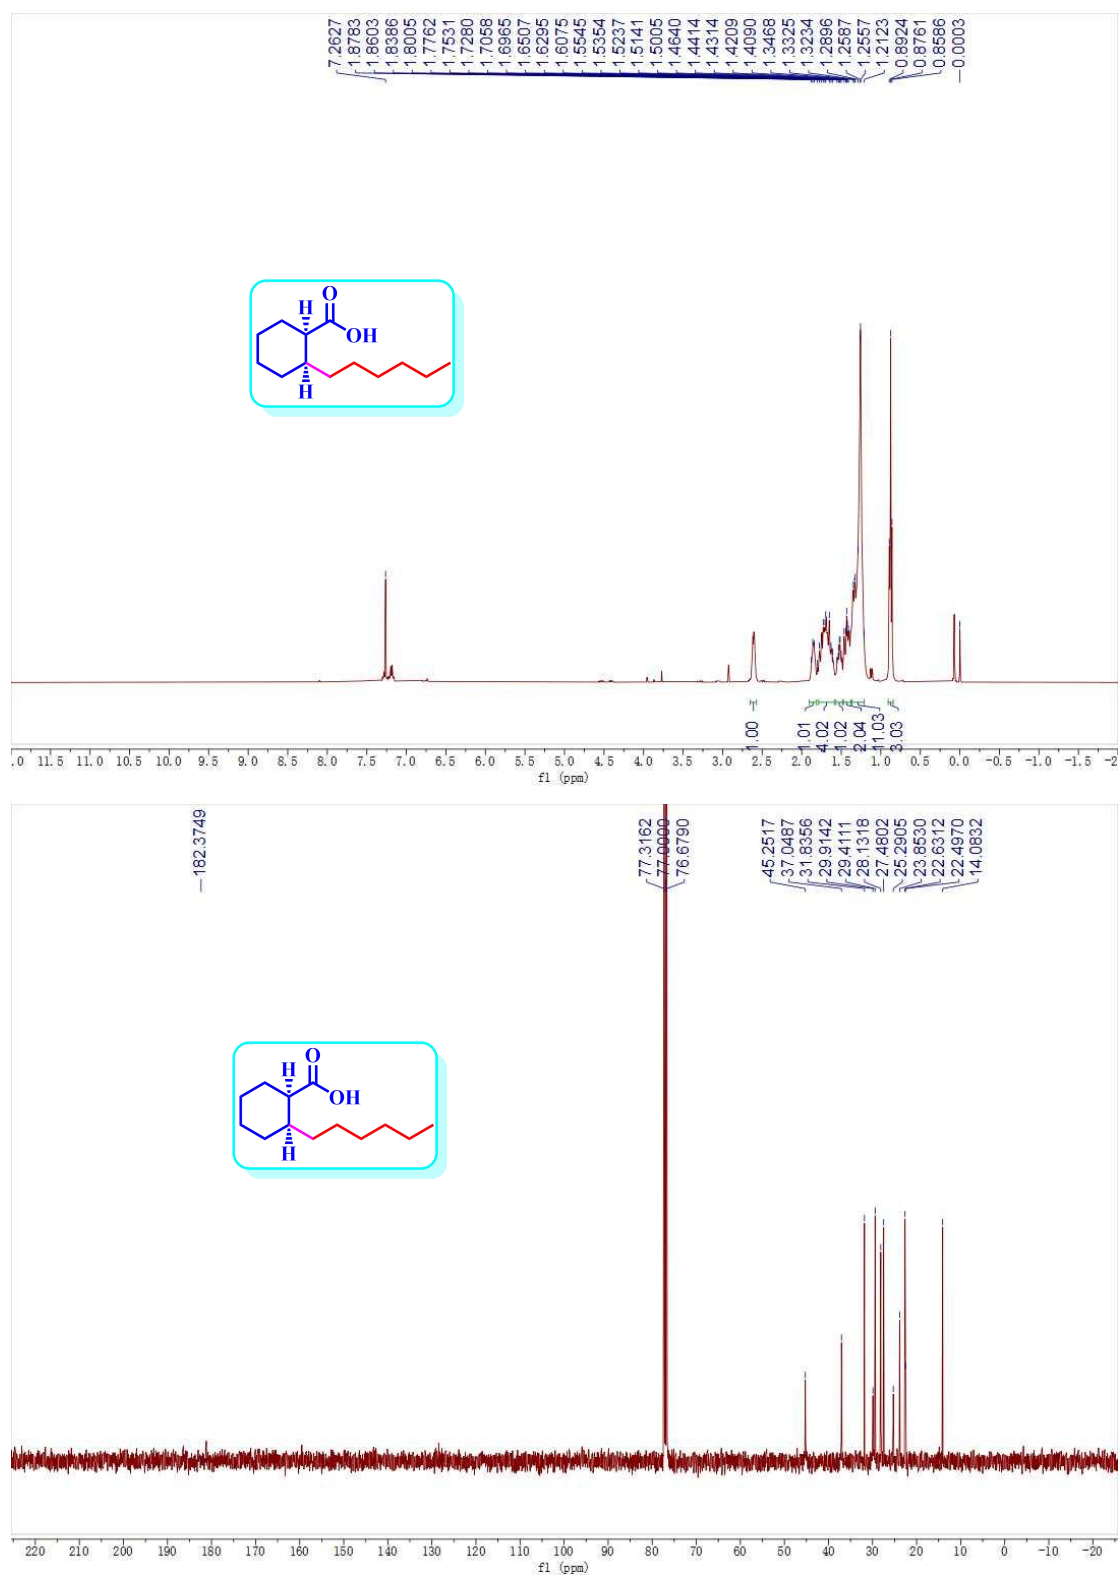

**Figure S39.**  $^1\text{H}$  (400 MHz) and  $^{13}\text{C}$   $\{^1\text{H}\}$  (101 MHz) NMR spectra of 4ac in  $\text{CDCl}_3$

**Cis-2-octylcyclohexane-1-carboxylic acid (4ad)**

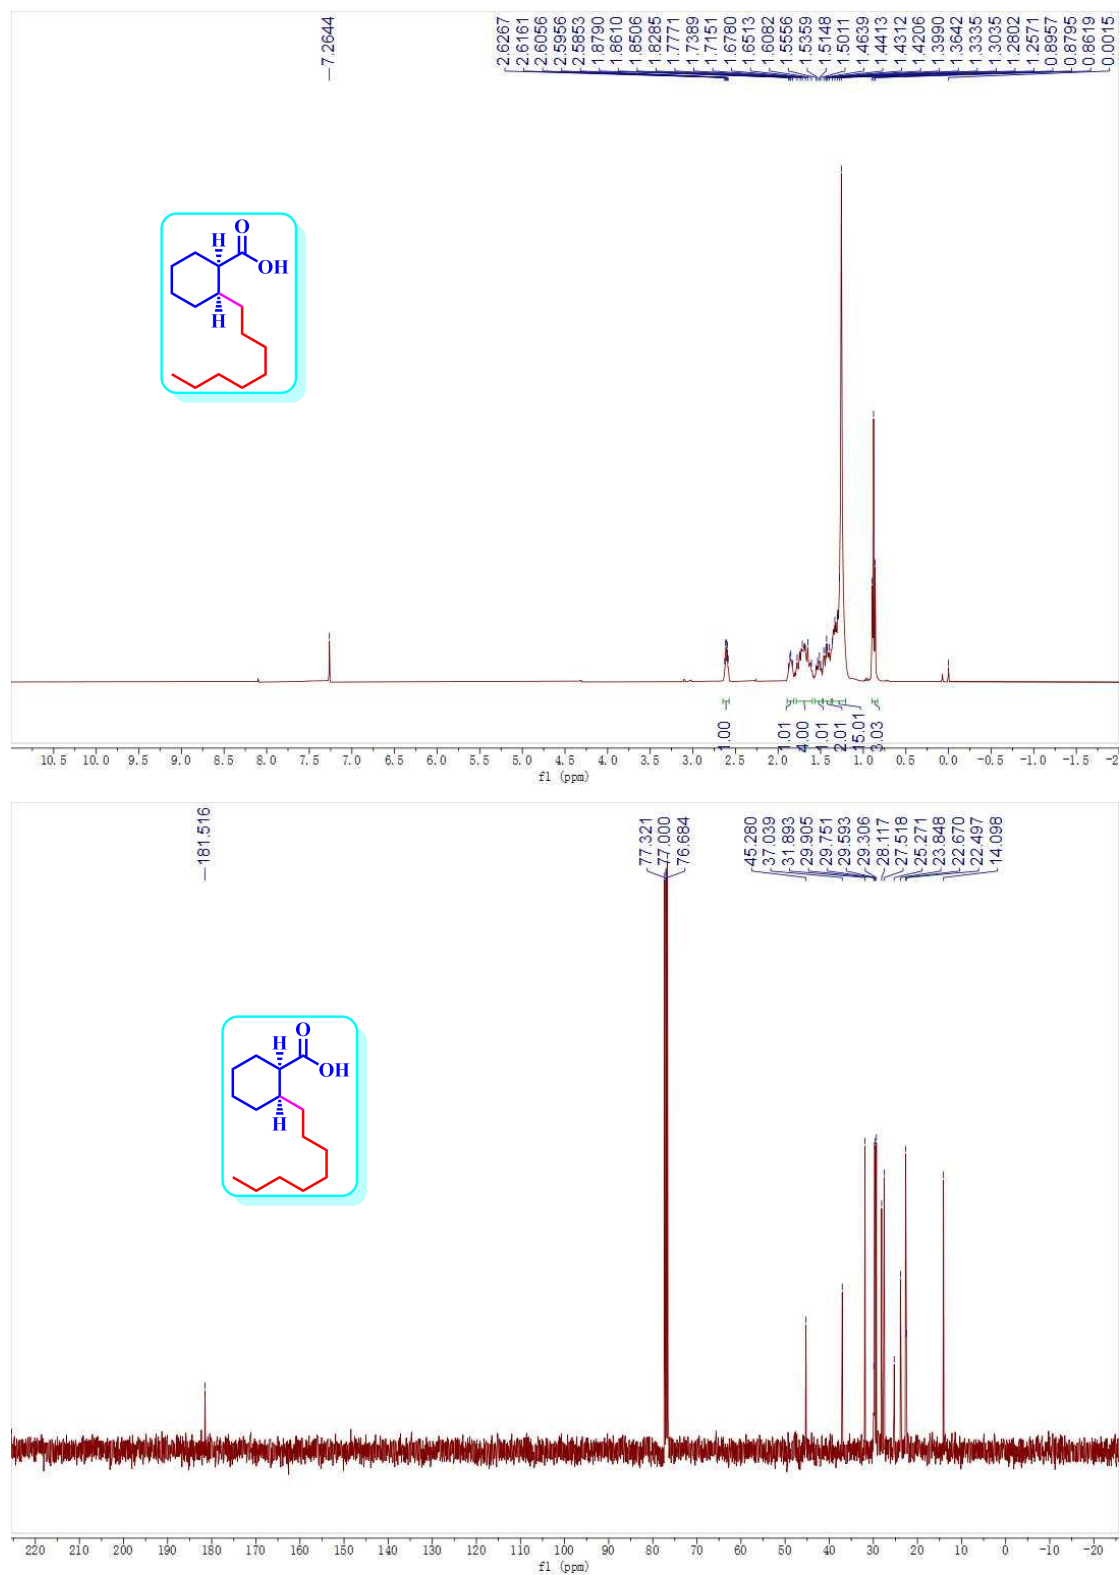

**Figure S40.  $^1\text{H}$  (400 MHz) and  $^{13}\text{C}$   $\{^1\text{H}\}$  (101 MHz) NMR spectra of 4ad in  $\text{CDCl}_3$**

**Cis-2-isopentylcyclohexane-1-carboxylic acid (4ae)**

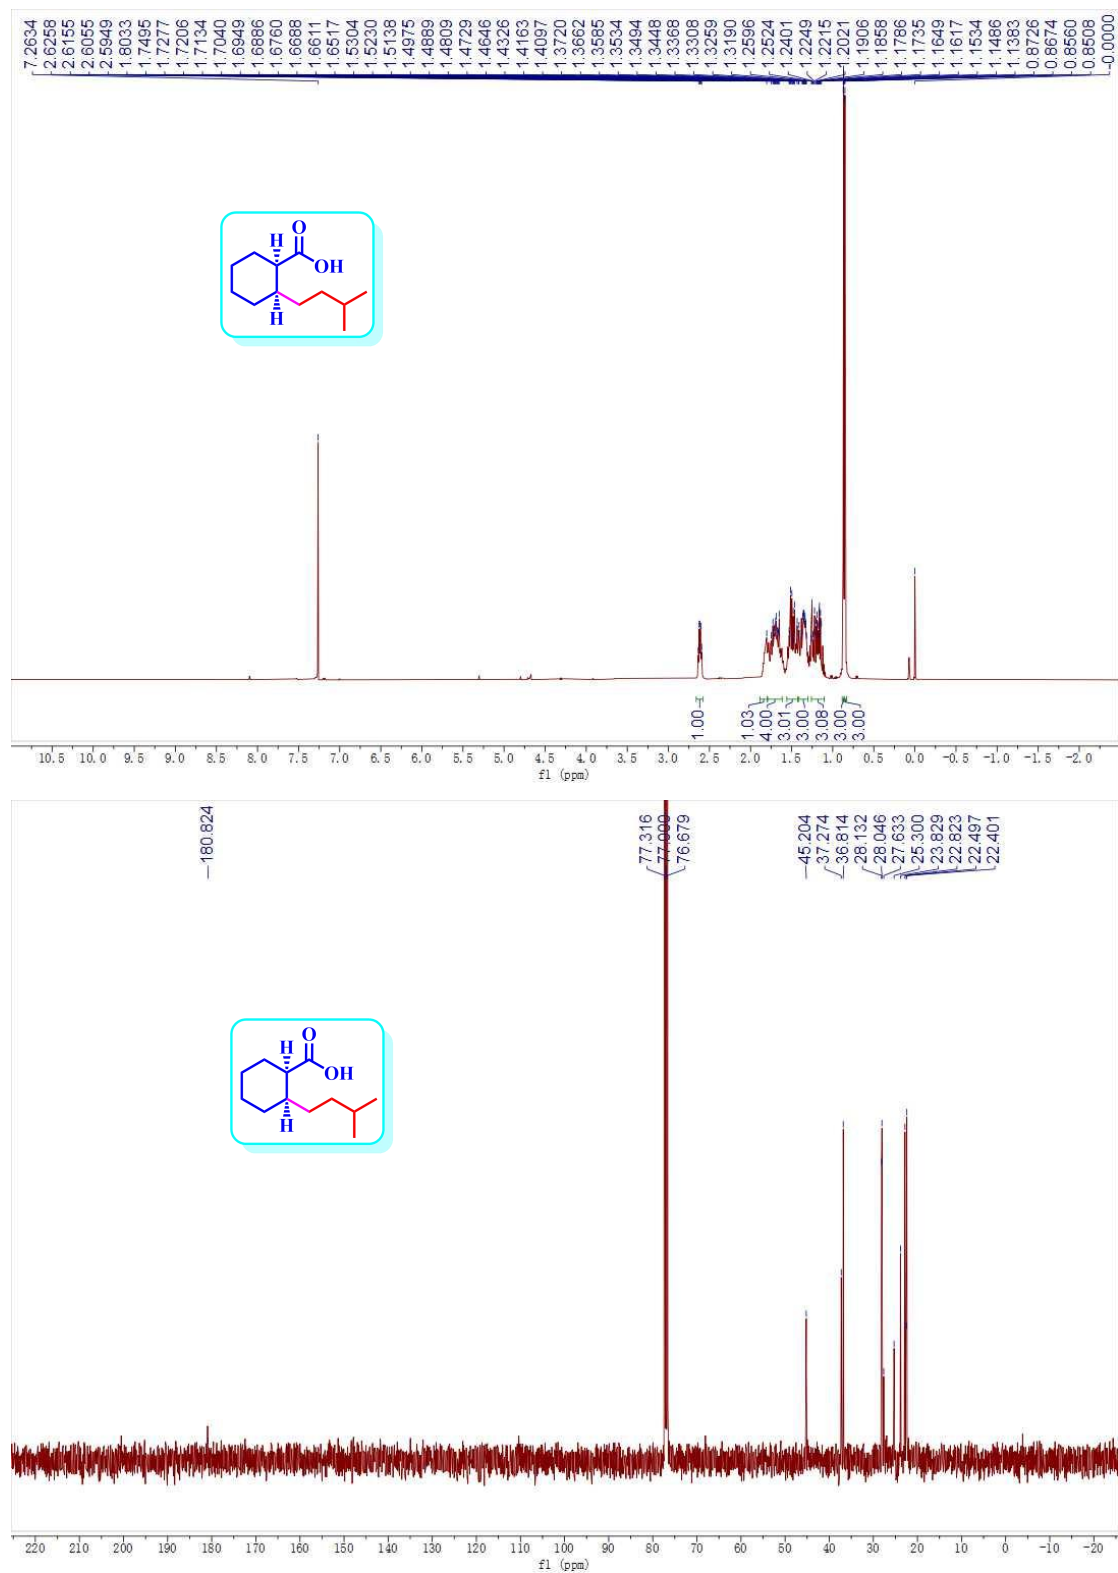

**Figure S41. <sup>1</sup>H (400 MHz) and <sup>13</sup>C {<sup>1</sup>H} (101 MHz) NMR spectra of 4ae in CDCl<sub>3</sub>**

**Cis-2-(cyclopentylmethyl)cyclohexane-1-carboxylic acid (4af)**

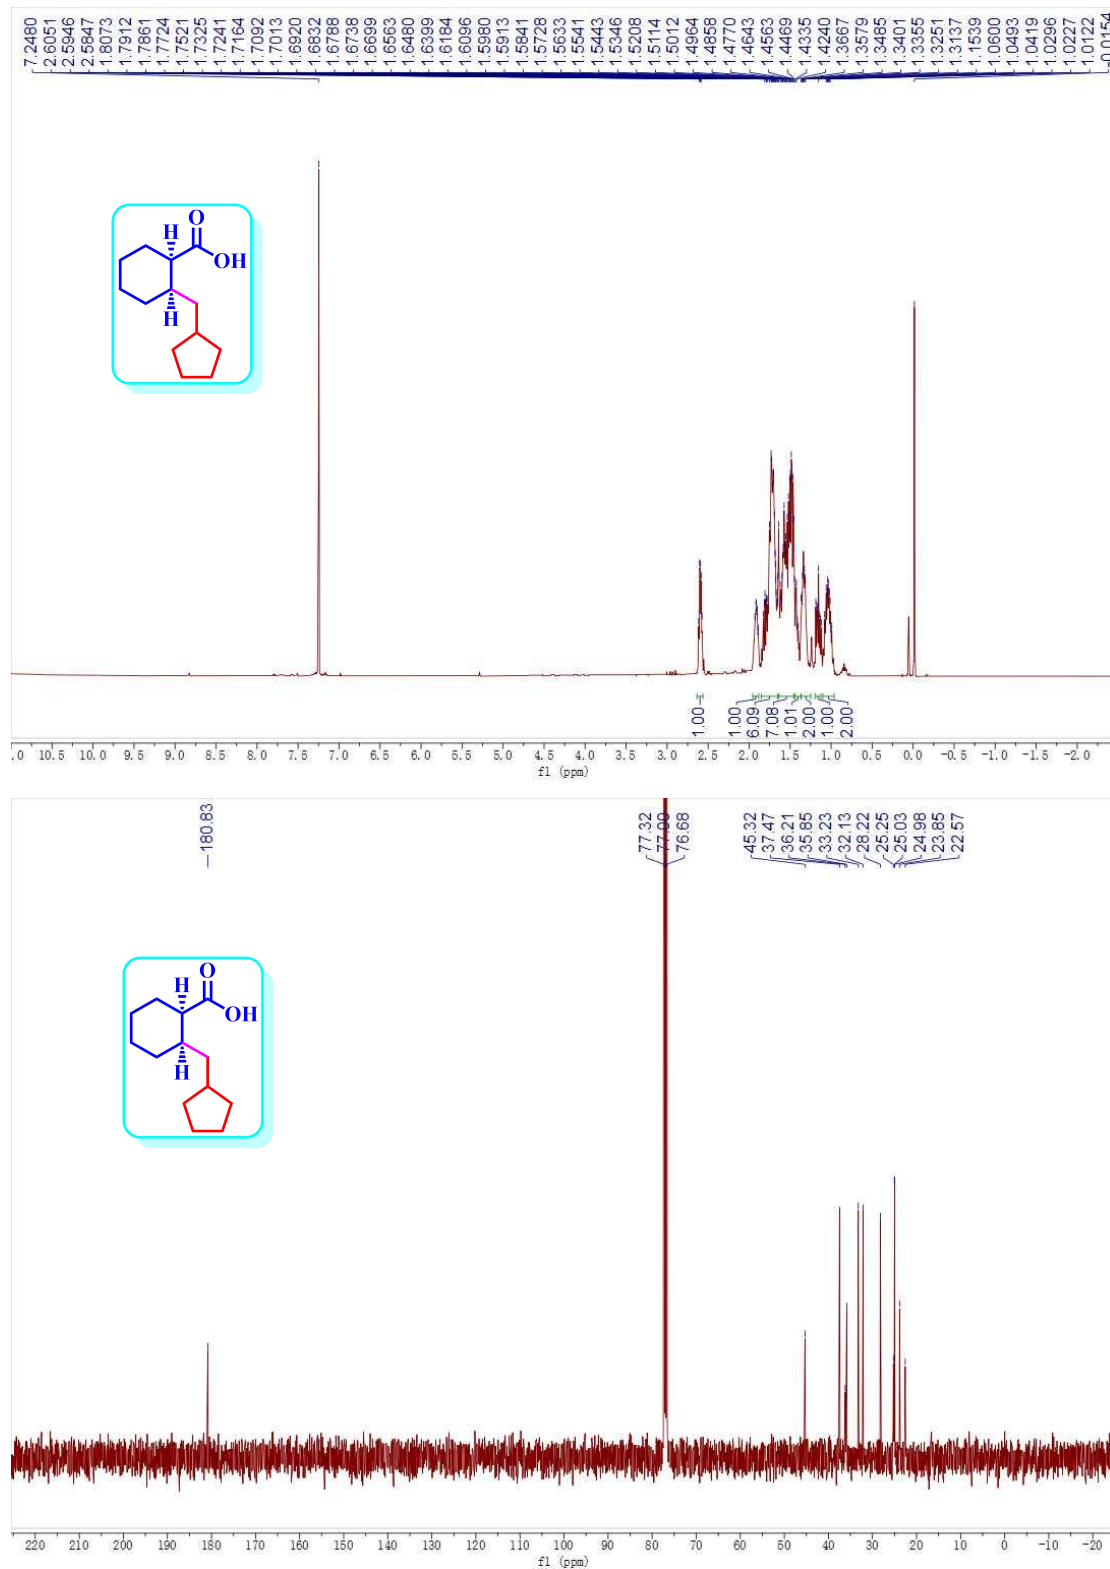

**Figure S42.  $^1\text{H}$  (400 MHz) and  $^{13}\text{C}$  { $^1\text{H}$ } (101 MHz) NMR spectra of 4af in  $\text{CDCl}_3$**

**Cis-2-(cyclohexylmethyl)cyclohexane-1-carboxylic acid (4ag)**

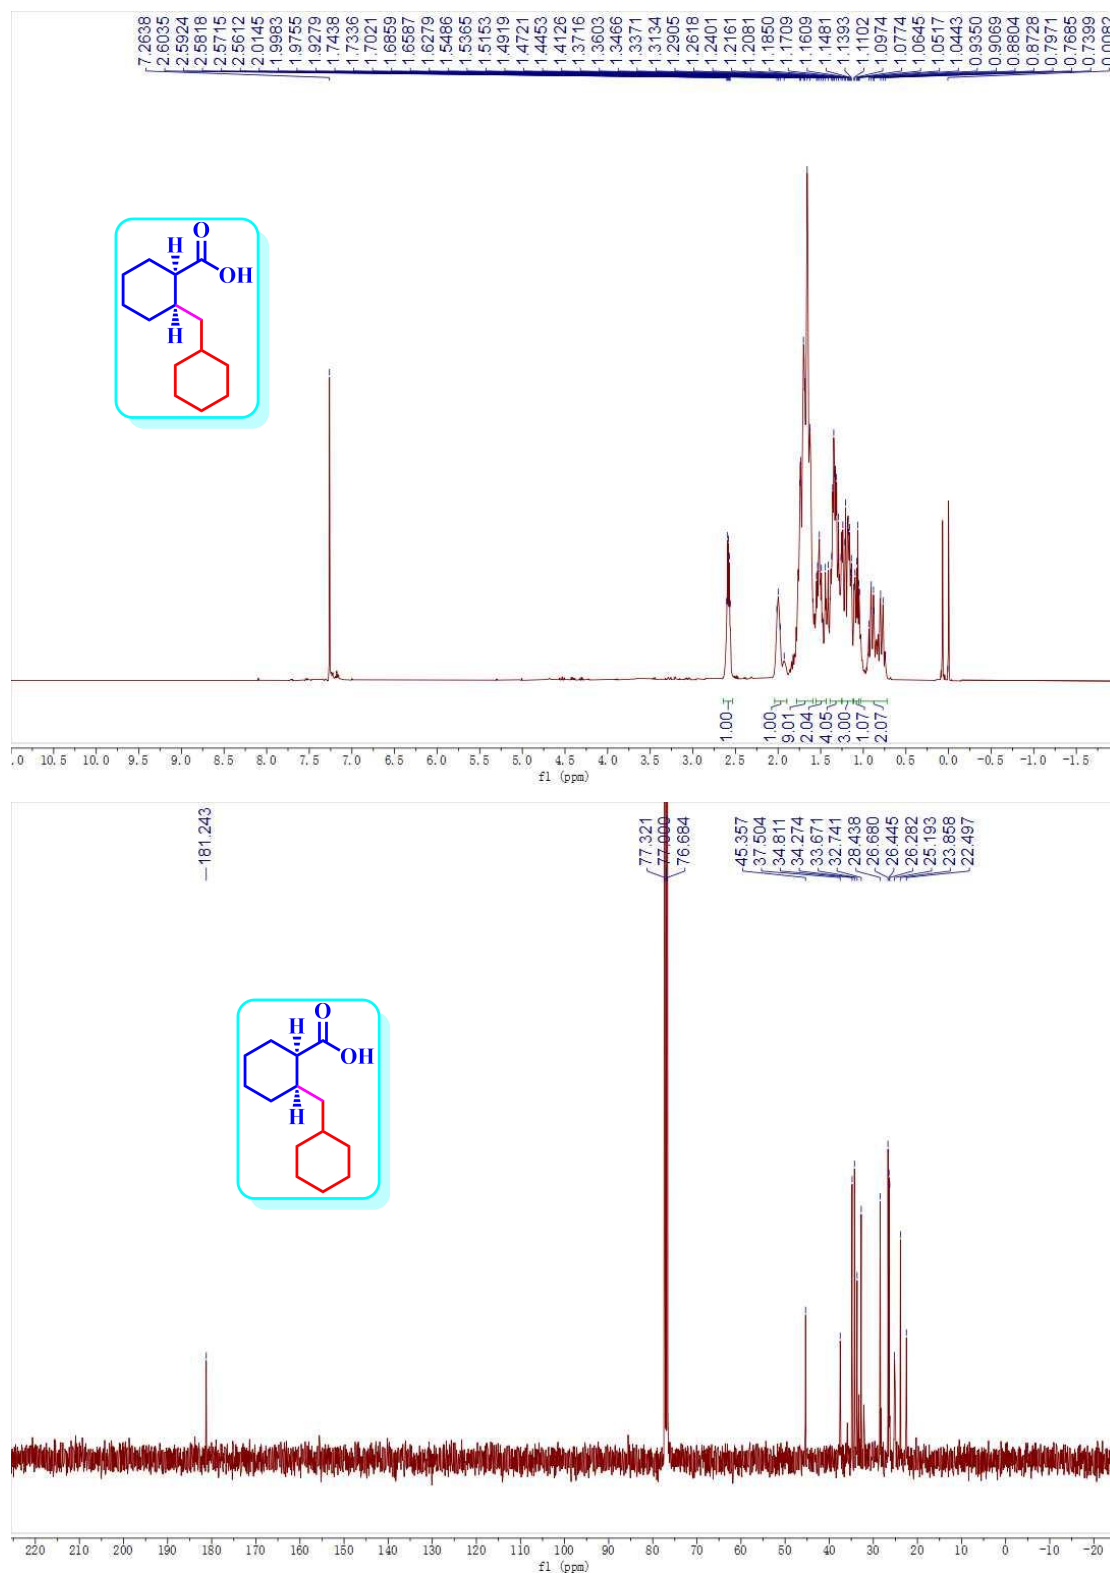

**Figure S43. <sup>1</sup>H (400 MHz) and <sup>13</sup>C {<sup>1</sup>H} (101 MHz) NMR spectra of 4ag in CDCl<sub>3</sub>**

**Cis-2-(4-methoxybutyl)cyclohexane-1-carboxylic acid (4ah)**

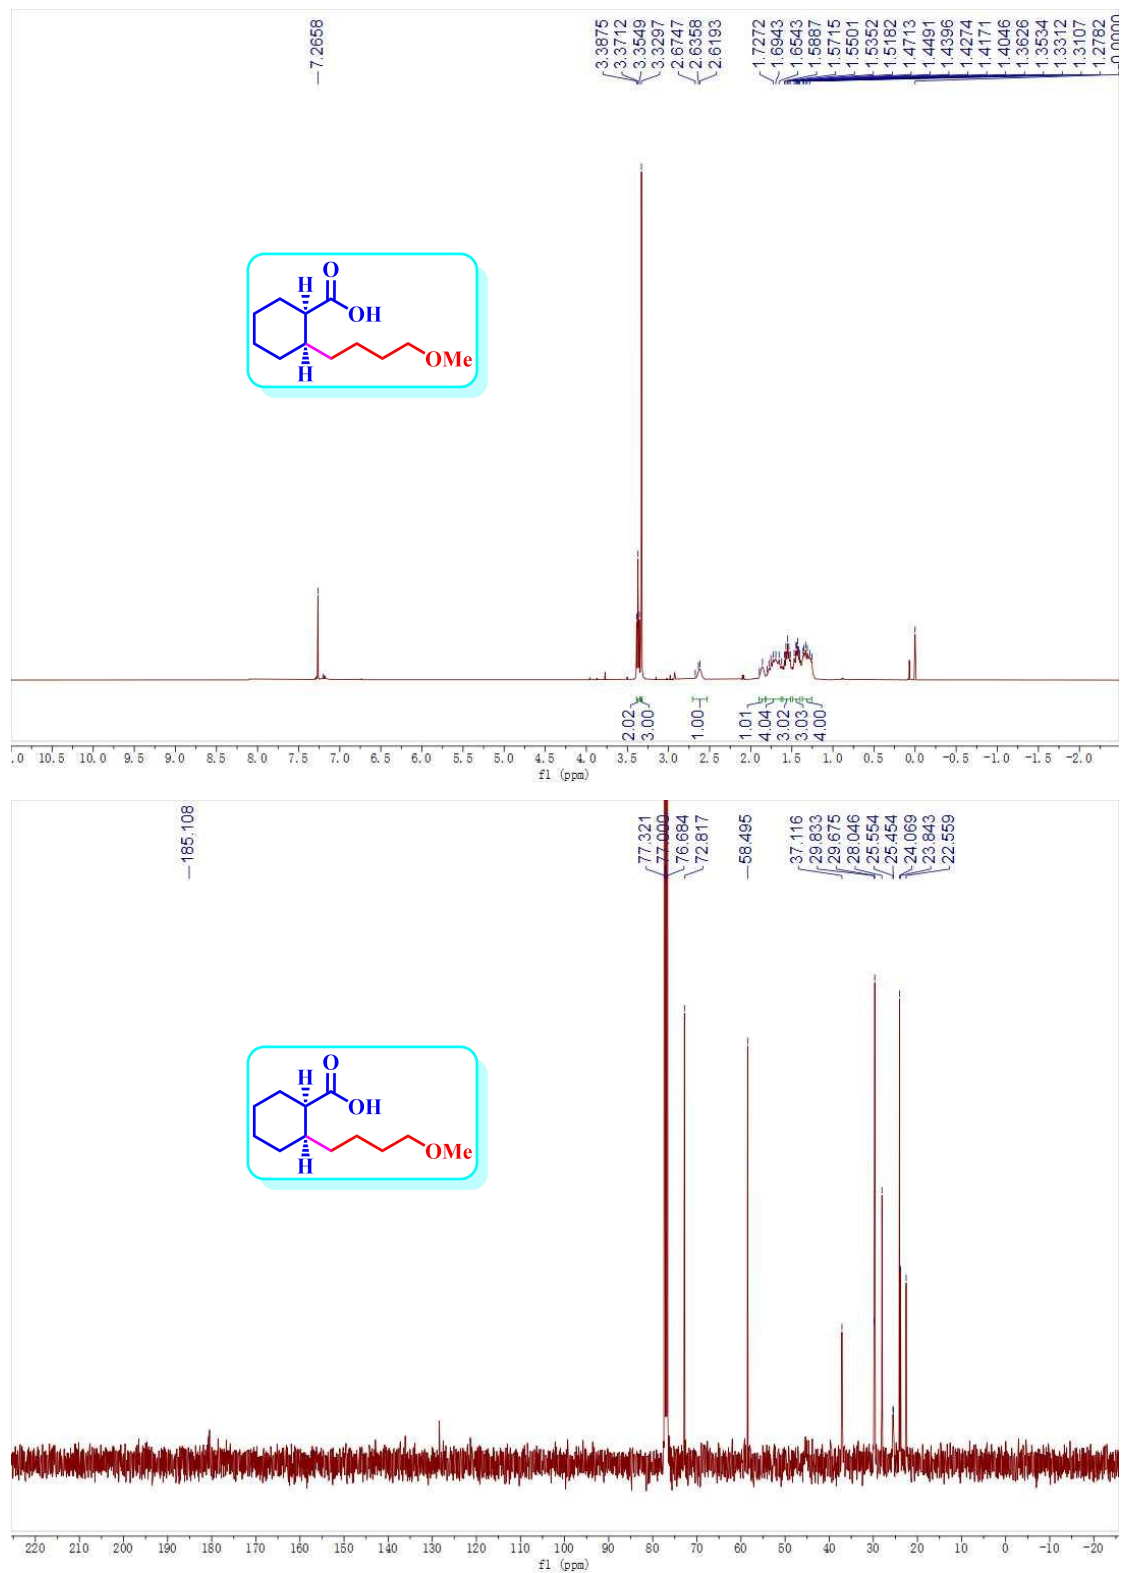

**Figure S44.** <sup>1</sup>H (400 MHz) and <sup>13</sup>C {<sup>1</sup>H} (101 MHz) NMR spectra of 4ah in CDCl<sub>3</sub>

***Cis*-2-(5-(propionyloxy)pentyl)cyclohexane-1-carboxylic acid (4ai)**

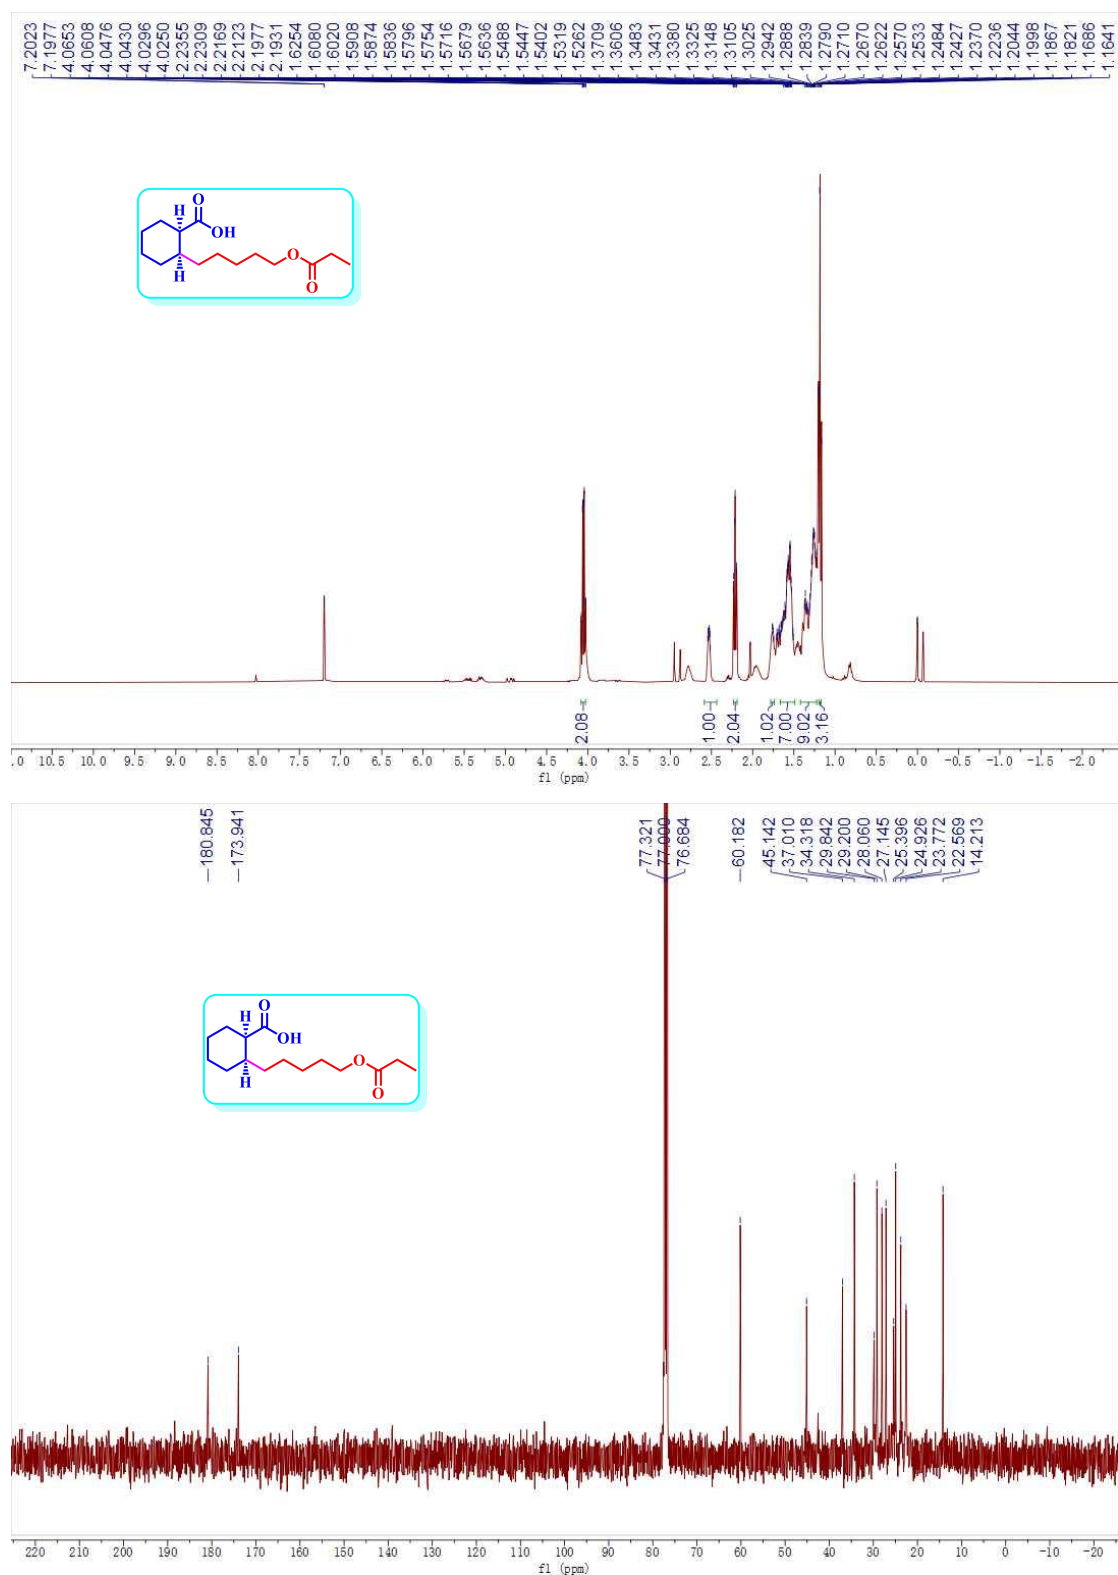

**Figure S45.**  $^1\text{H}$  (400 MHz) and  $^{13}\text{C}$   $\{^1\text{H}\}$  (101 MHz) NMR spectra of 4ai in  $\text{CDCl}_3$

**Cis-2-(7-ethoxy-7-oxoheptyl)cyclohexane-1-carboxylic acid (4aj)**

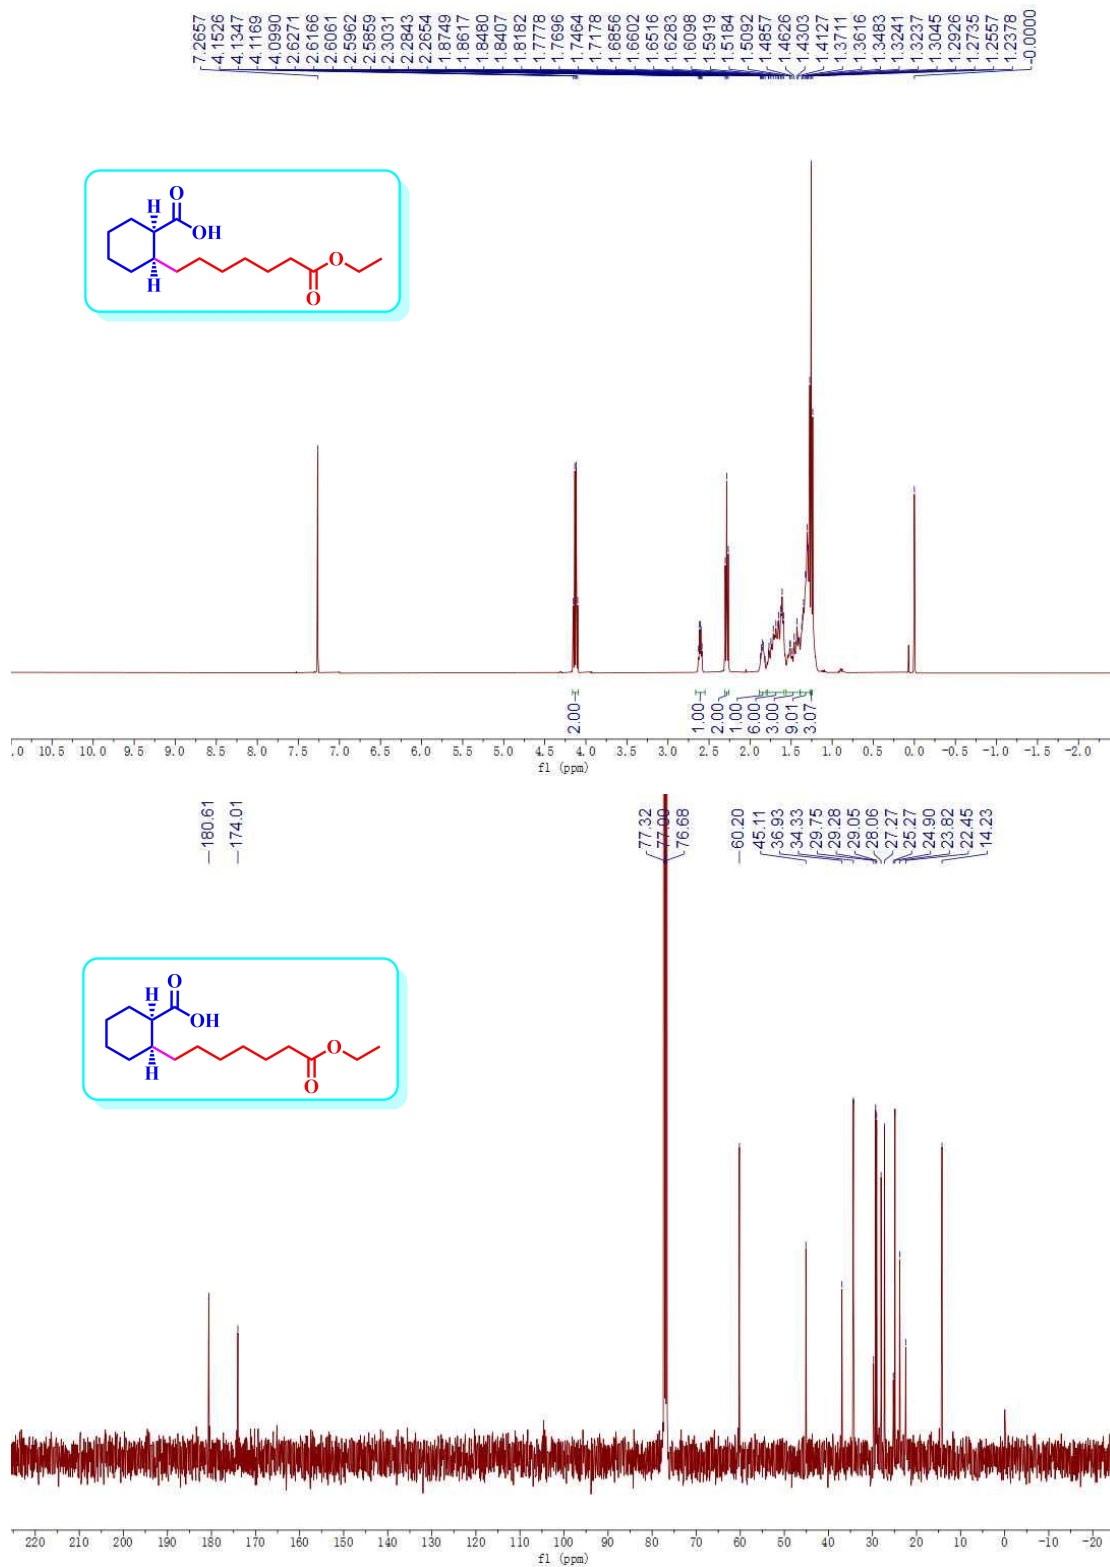

**Figure S46.** <sup>1</sup>H (400 MHz) and <sup>13</sup>C {<sup>1</sup>H} (101 MHz) NMR spectra of 4aj in CDCl<sub>3</sub>

**Cis-2-(3-phenylpropyl)cyclohexane-1-carboxylic acid (4ak)**

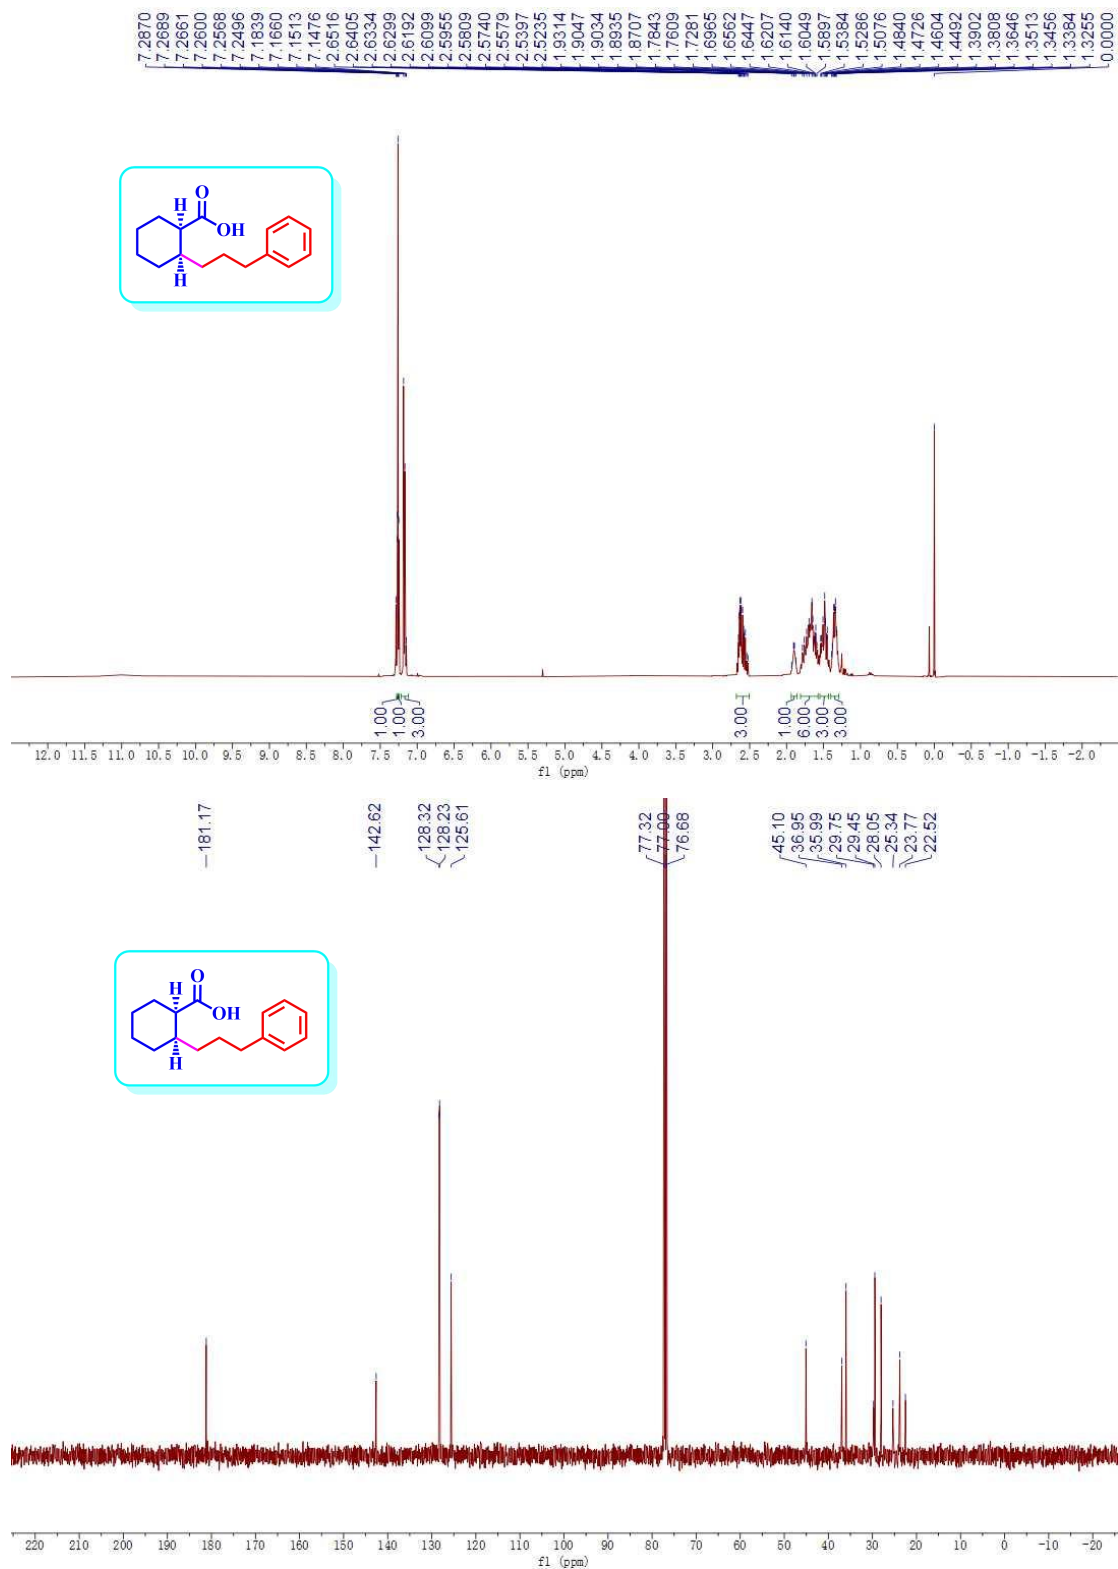

**Figure S47. <sup>1</sup>H (400 MHz) and <sup>13</sup>C {<sup>1</sup>H} (101 MHz) NMR spectra of 4ak in CDCl<sub>3</sub>**

**Cis-2-phenethylcyclohexane-1-carboxylic acid (4a)**

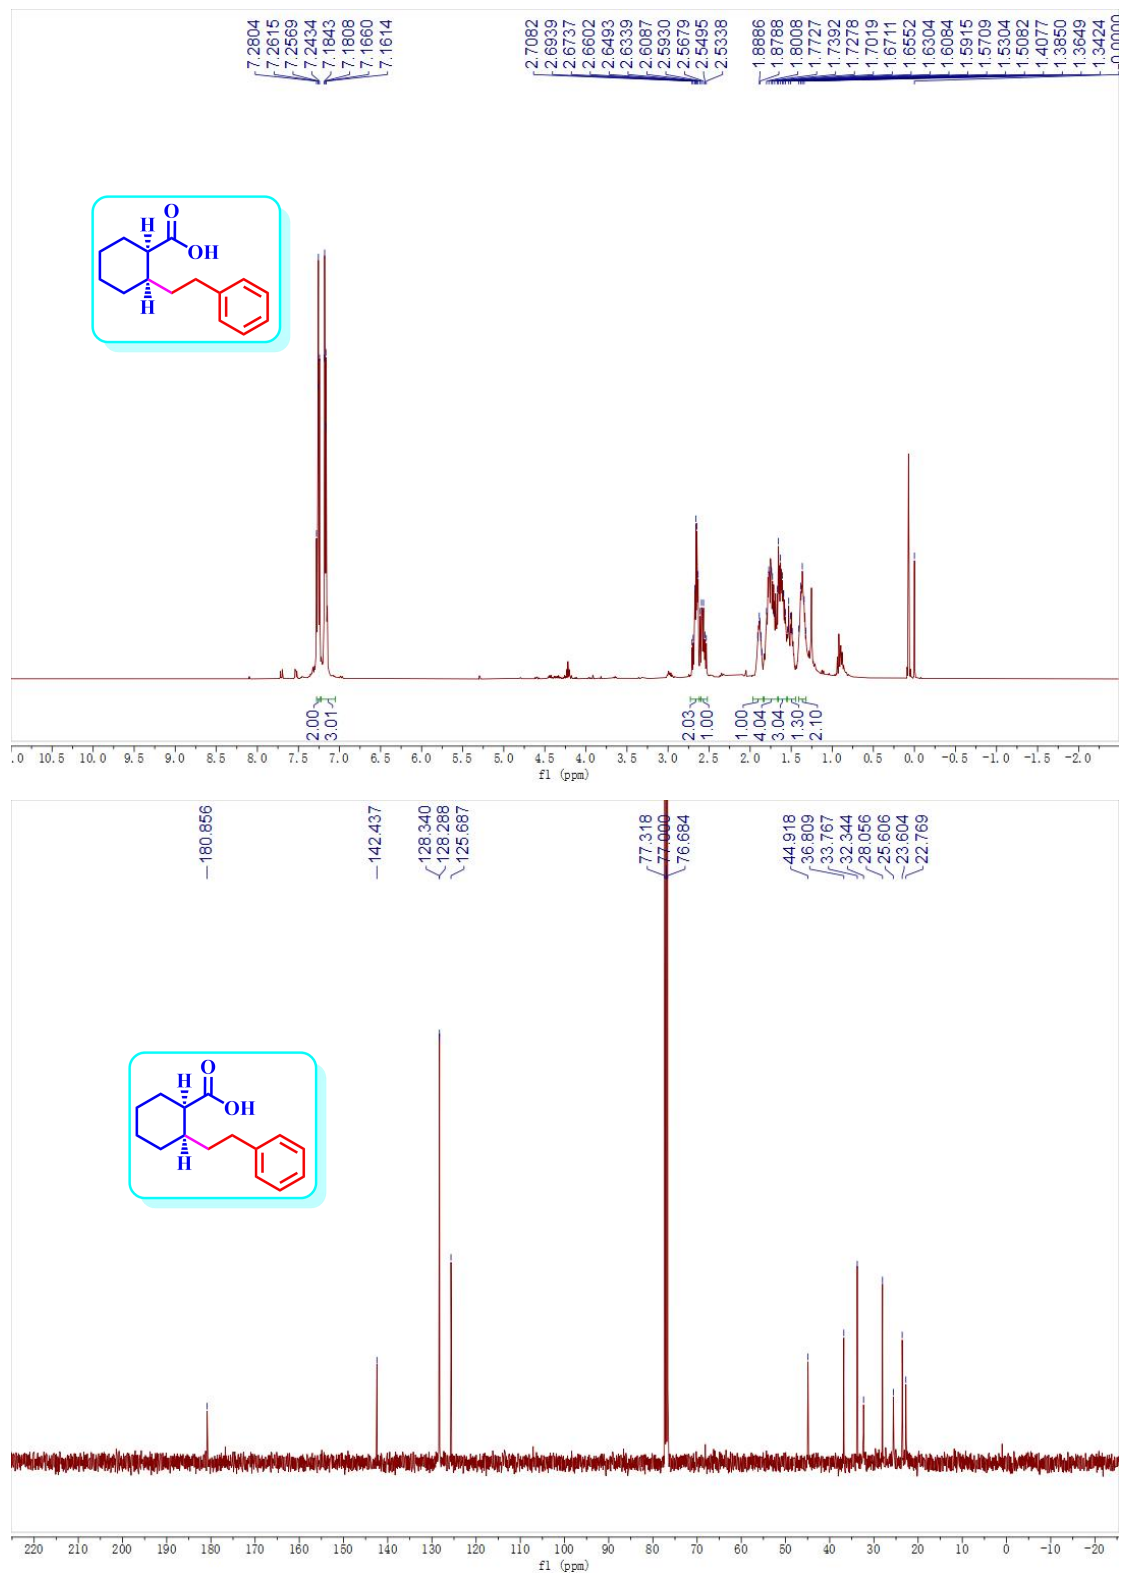

**Figure S48.  $^1\text{H}$  (400 MHz) and  $^{13}\text{C}$   $\{^1\text{H}\}$  (101 MHz) NMR spectra of 4a in  $\text{CDCl}_3$**

***Cis*-2-(8-(hexadecan-8-yloxy)-8-oxooctyl)cyclohexane-1-carboxylic acid (4am)**

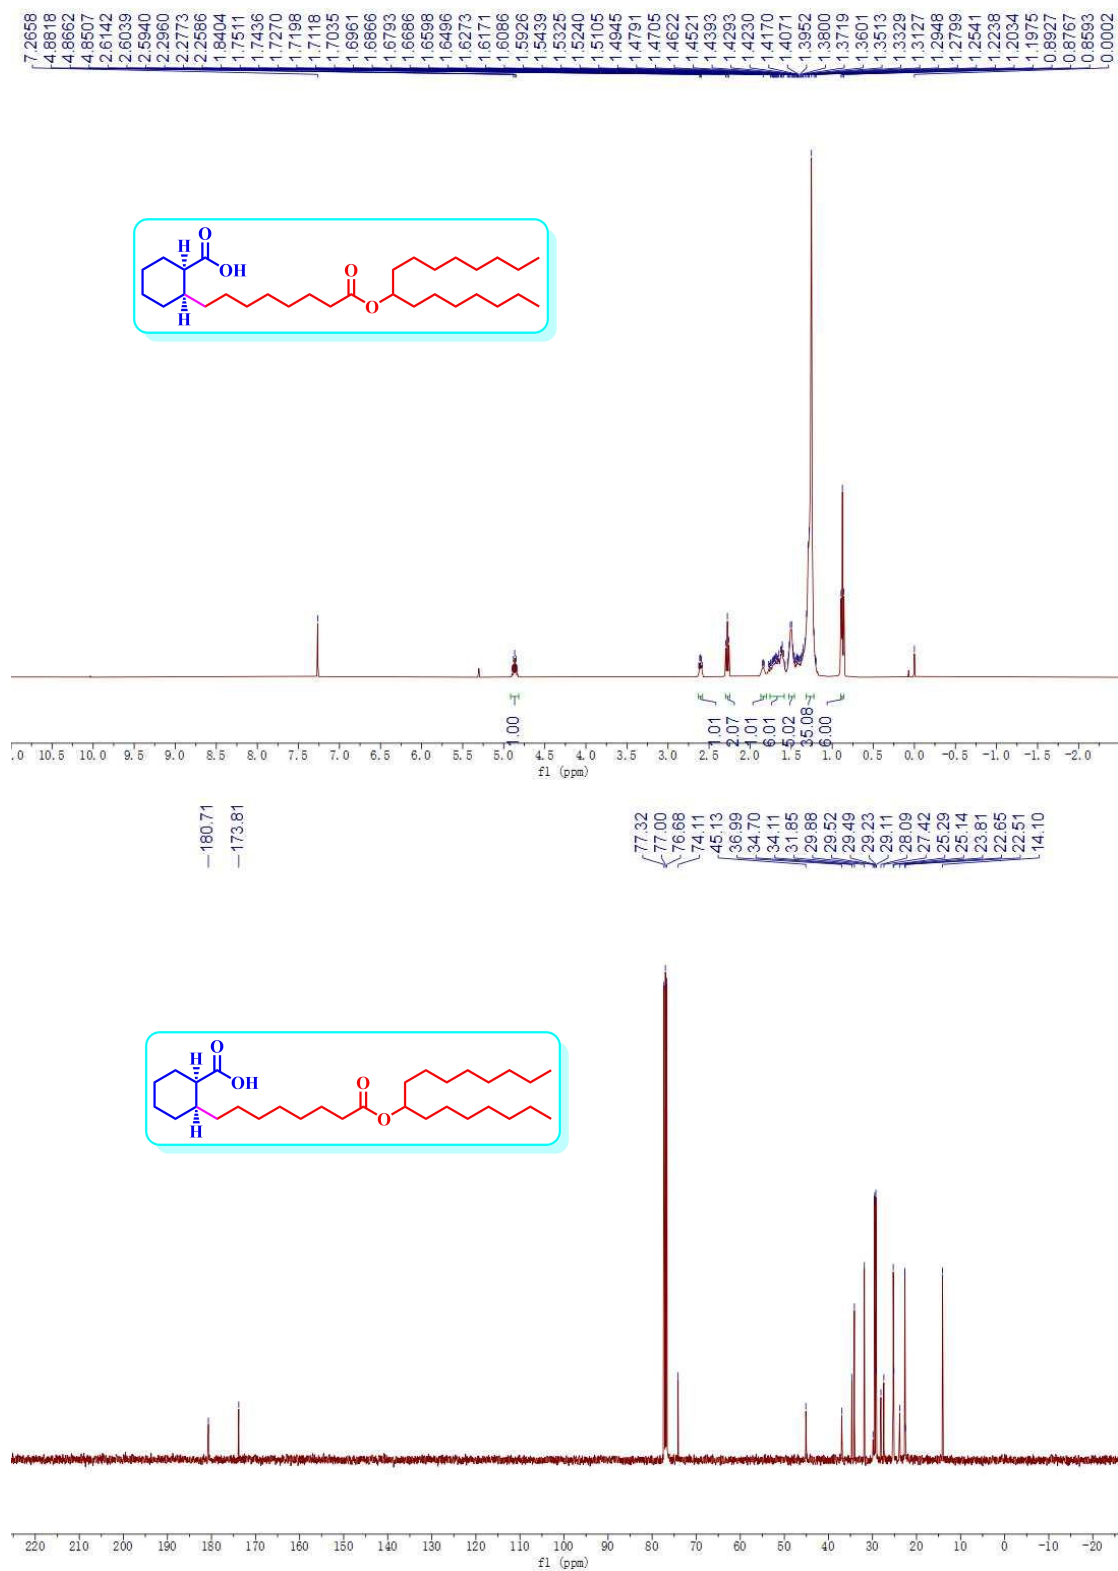

**Figure S49.** <sup>1</sup>H (400 MHz) and <sup>13</sup>C {<sup>1</sup>H} (101 MHz) NMR spectra of 4am in CDCl<sub>3</sub>

**Cis-2-(6-((2-heptylnonanoyl)oxy)hexyl)cyclohexane-1-carboxylic acid (4an)**

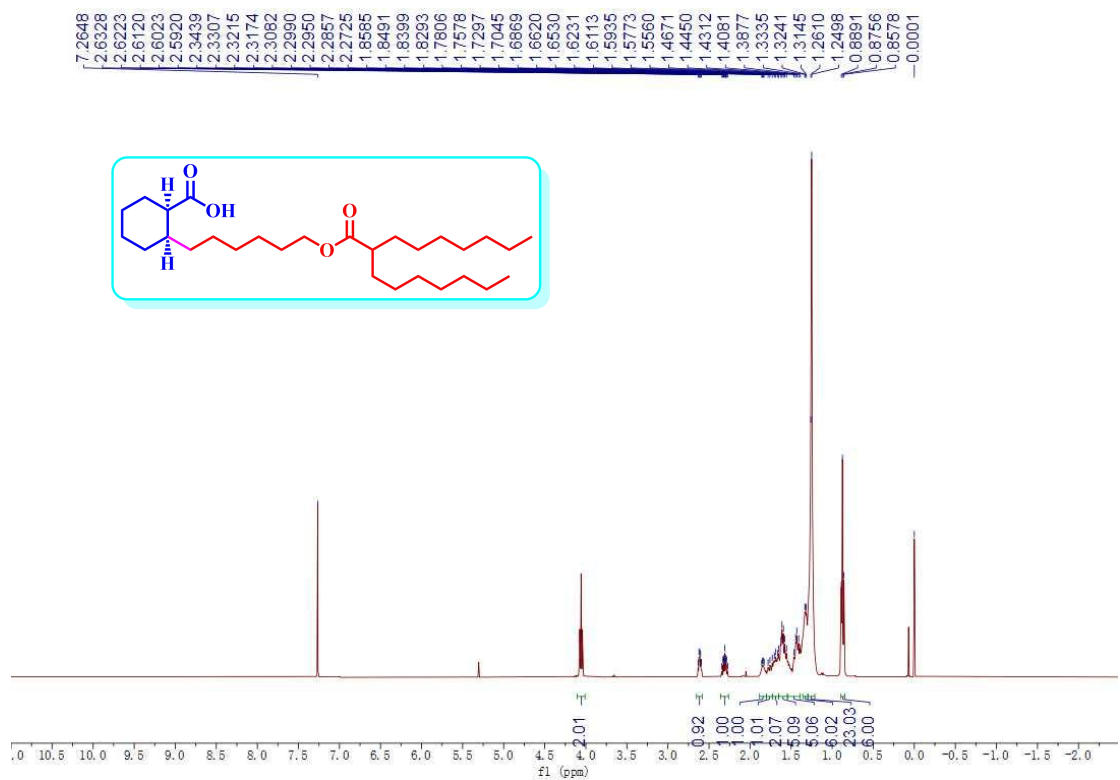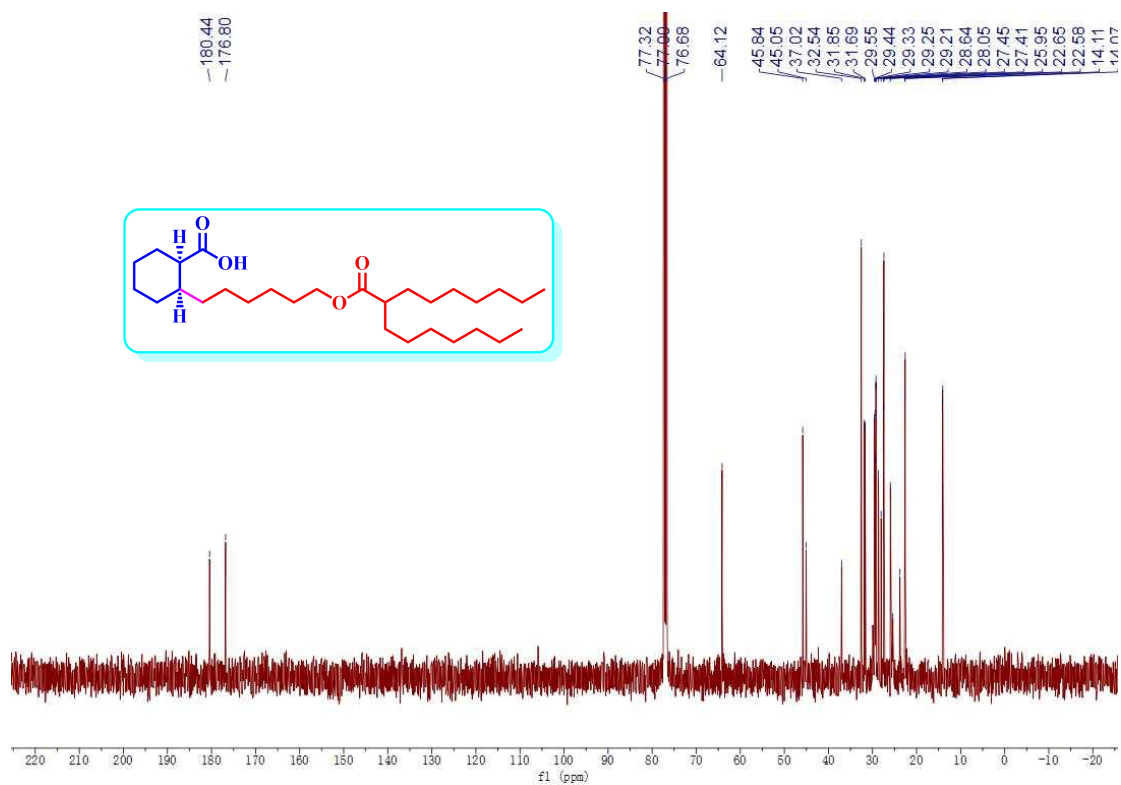

**Figure S50.** <sup>1</sup>H (400 MHz) and <sup>13</sup>C {<sup>1</sup>H} (101 MHz) NMR spectra of **4an** in CDCl<sub>3</sub>

**Cis-[1,1'-bi(cyclohexane)]-2-carboxylic acid (4ao)**

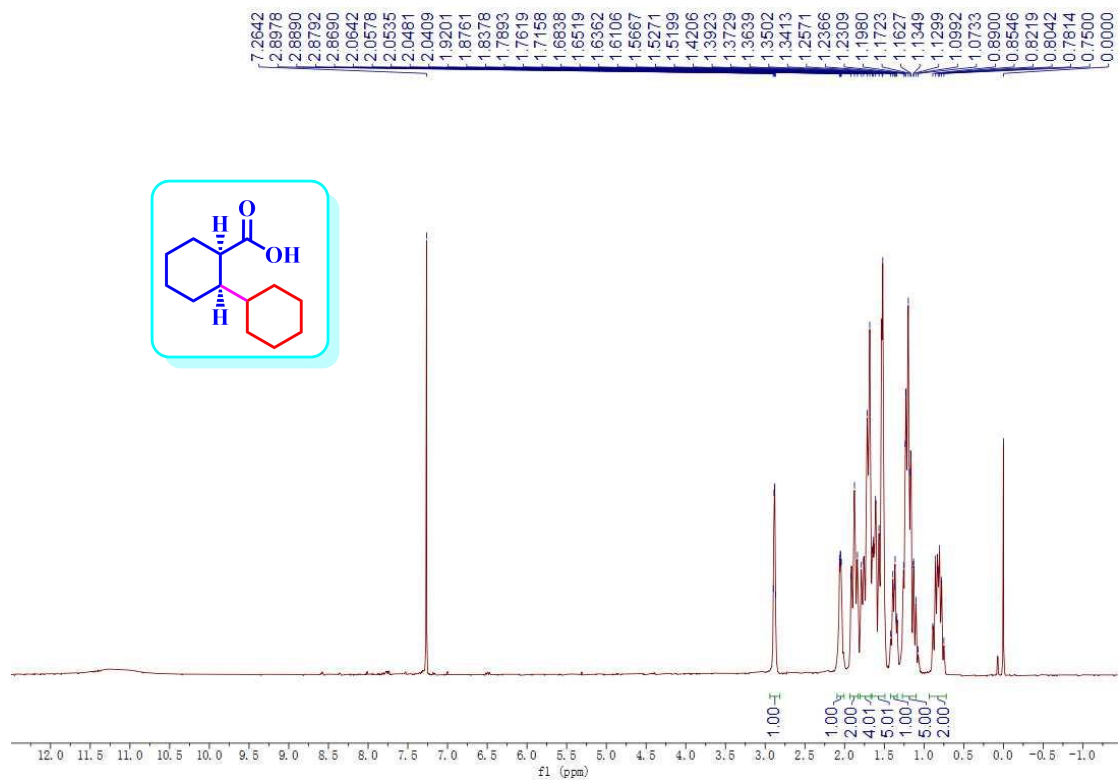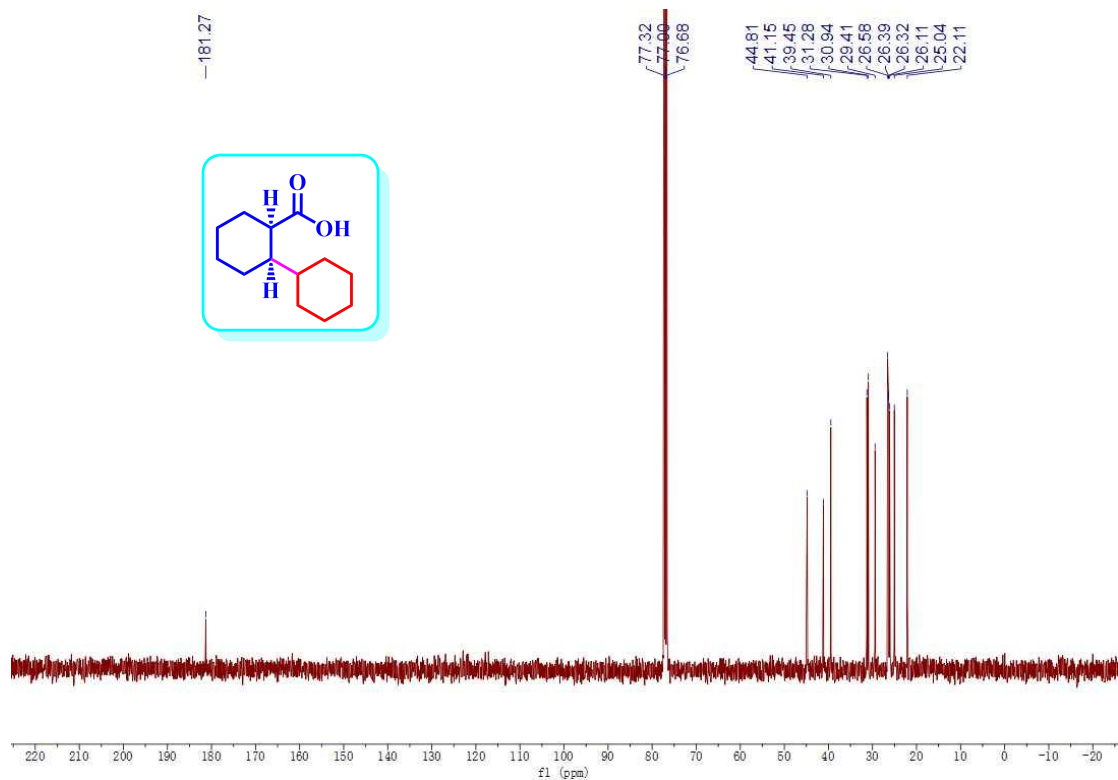

**Figure S51.**  $^1\text{H}$  (400 MHz) and  $^{13}\text{C}$   $\{^1\text{H}\}$  (101 MHz) NMR spectra of 4ao in  $\text{CDCl}_3$

**Cis-2-phenethylcyclopentane-1-carboxylic acid (4bl)**

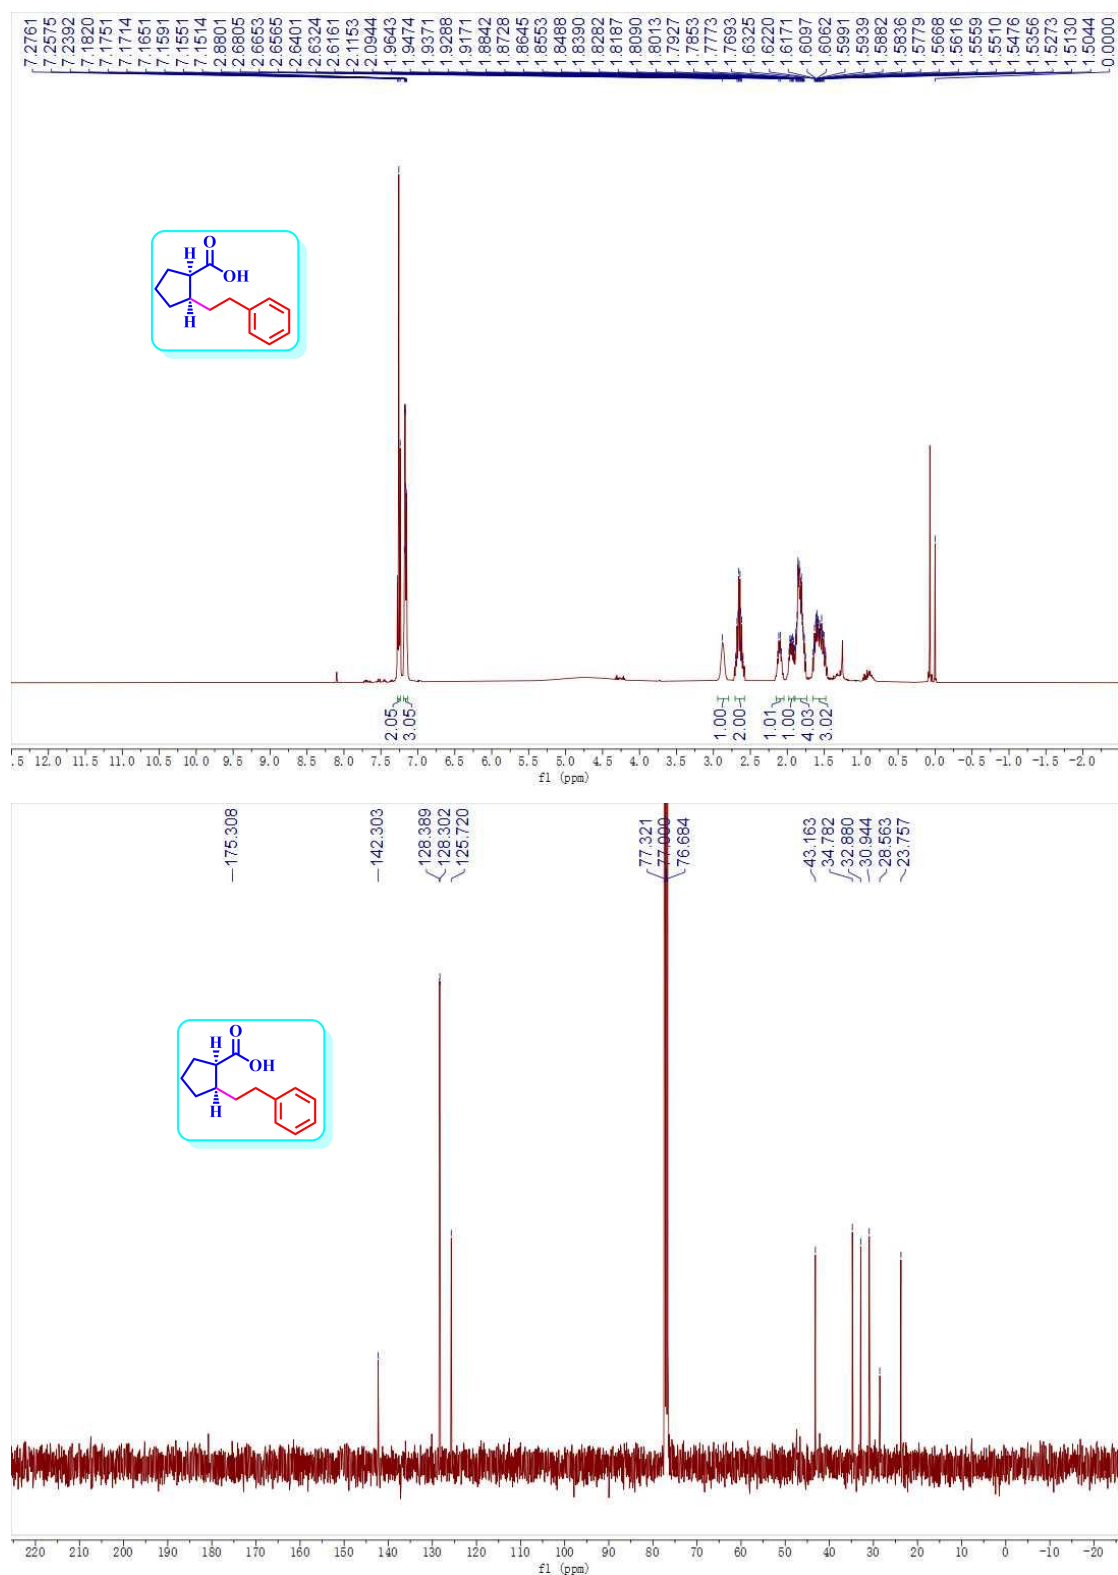

**Figure S52. <sup>1</sup>H (400 MHz) and <sup>13</sup>C {<sup>1</sup>H} (101 MHz) NMR spectra of 4bl in CDCl<sub>3</sub>**

**Cis-2-phenethylcyclobutane-1-carboxylic acid (4cl)**

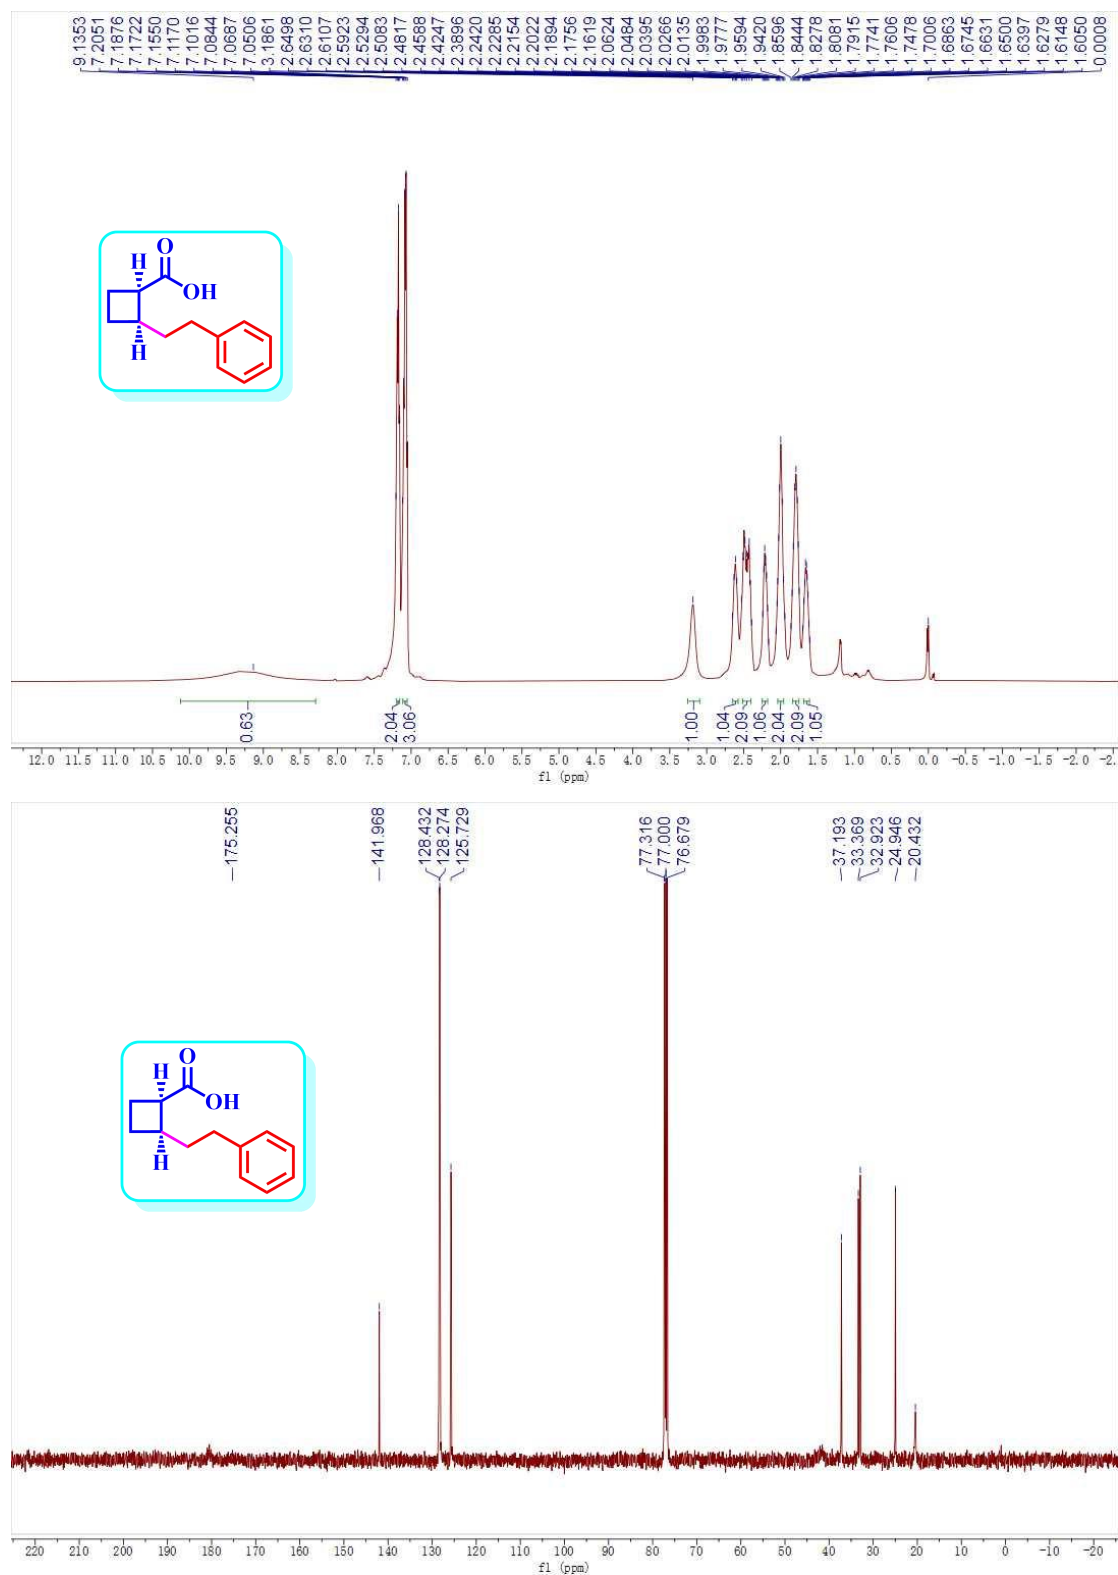

**Figure S53. <sup>1</sup>H (400 MHz) and <sup>13</sup>C {<sup>1</sup>H} (101 MHz) NMR spectra of 4cl in CDCl<sub>3</sub>**

**Cis-2-phenethylcyclobutane-1-carboxylic acid (4dl)**

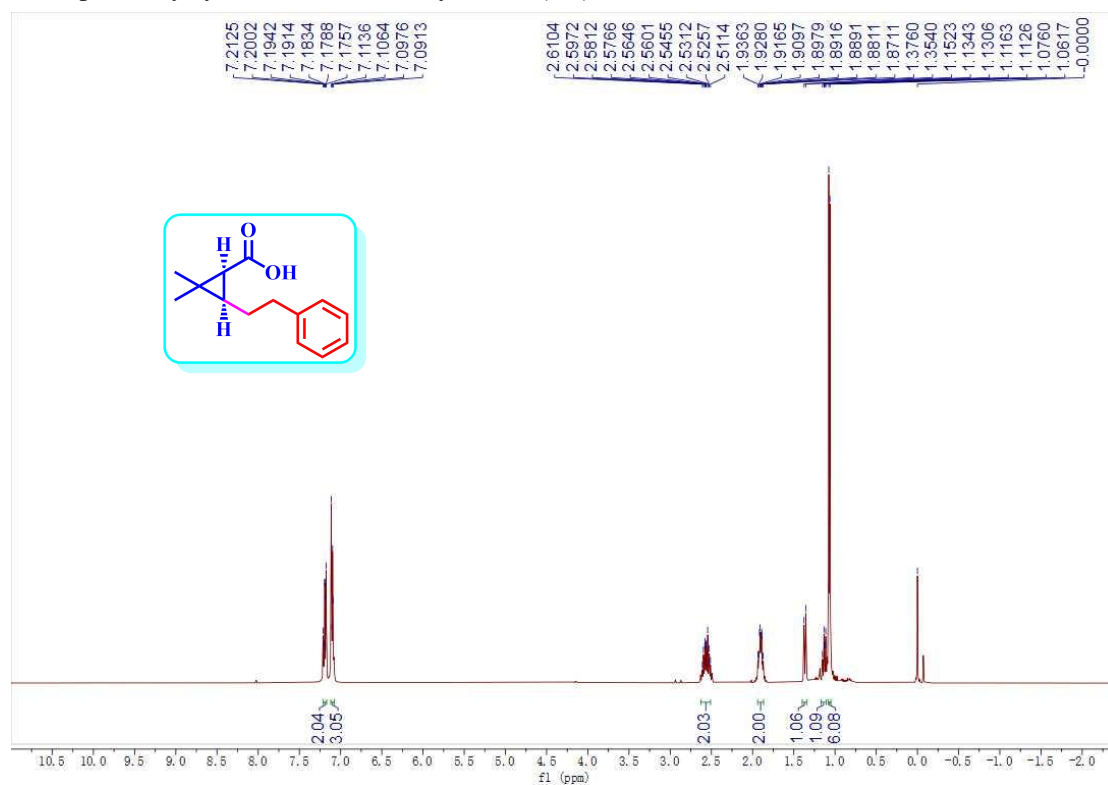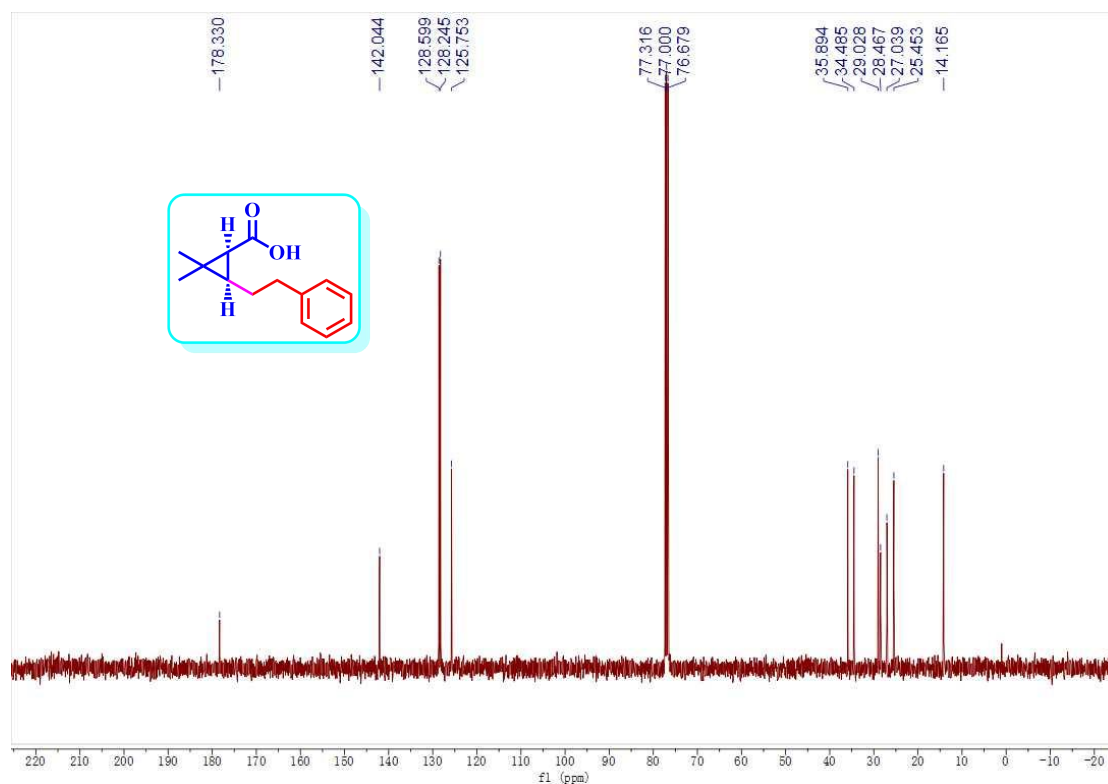

**Figure S54.** <sup>1</sup>H (400 MHz) and <sup>13</sup>C {<sup>1</sup>H} (101 MHz) NMR spectra of 4dl in CDCl<sub>3</sub>

**2-(1-(3-phenylpropyl)cyclopentyl)acetic acid (4el)**

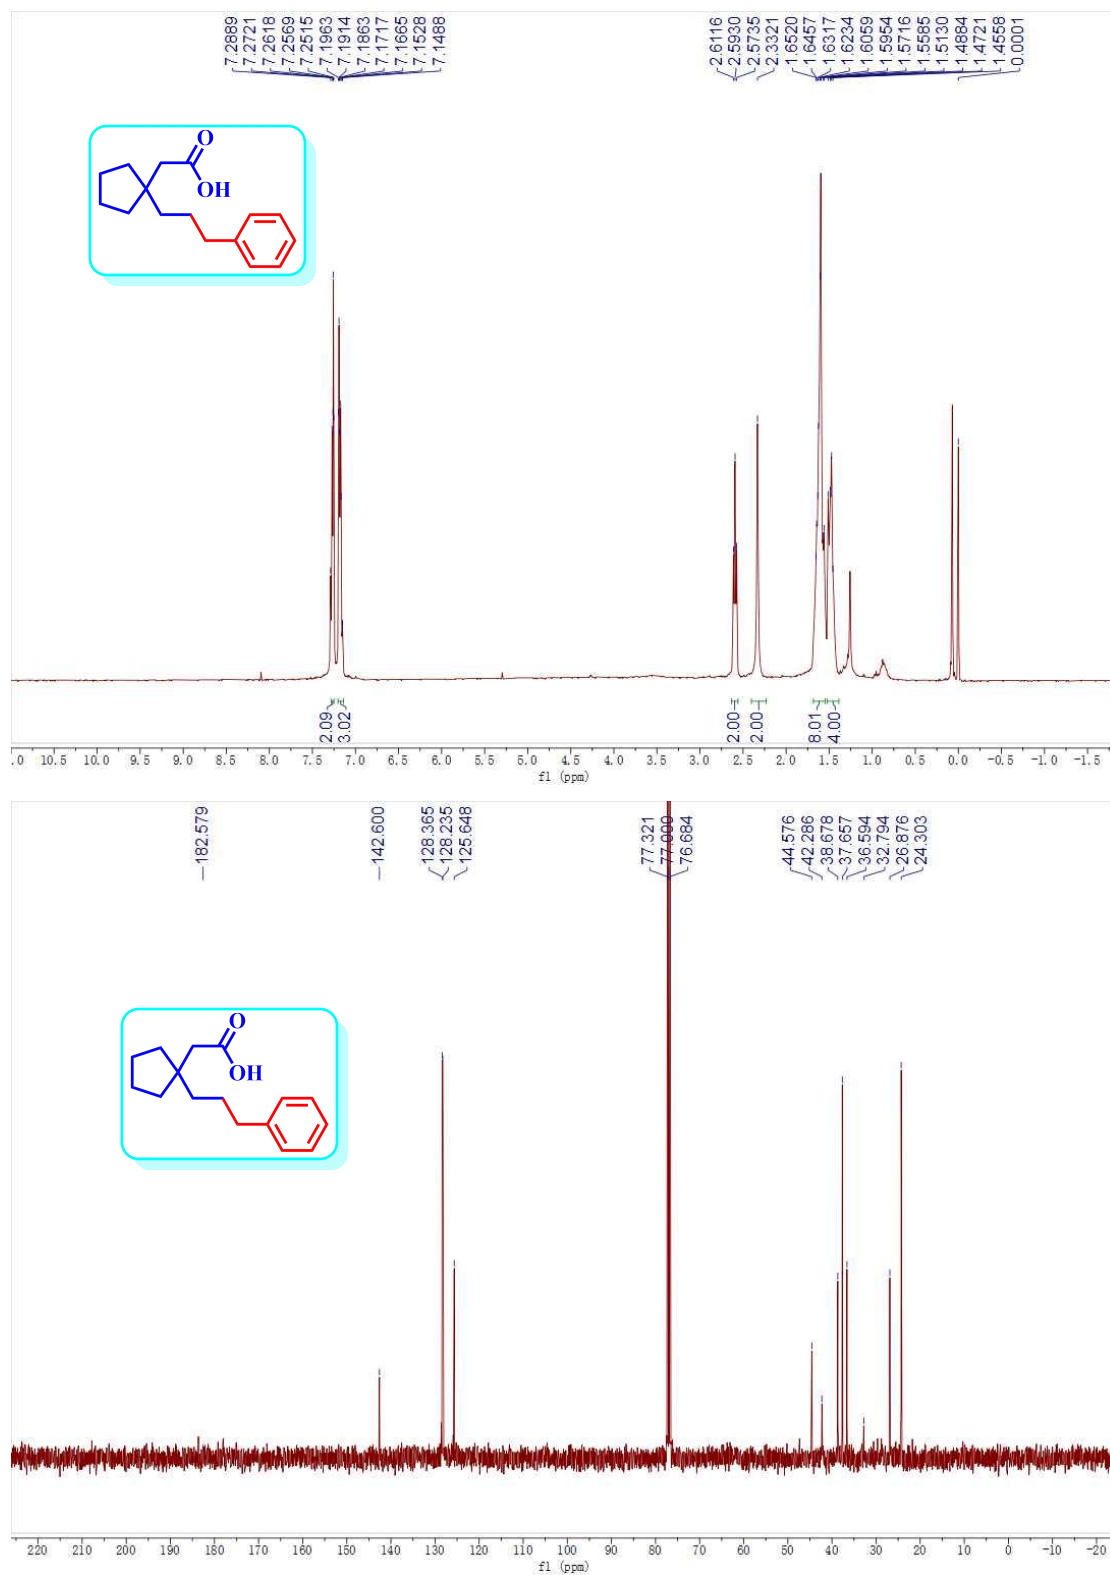

Figure S55. <sup>1</sup>H (400 MHz) and <sup>13</sup>C {<sup>1</sup>H} (101 MHz) NMR spectra of 4el in CDCl<sub>3</sub>
